# Supplementary material for: Proteomic analysis of multiple primary cilia reveals a novel mode of ciliary development in mammals
Source: Oxford University Press journal article supplement (doi:10.1242/bio.20121081), 2012-06-29
Supplement: bio_20121081-ts1.pdf [file bio_20121081-ts1.pdf]

| Swine protein data |          |            |       |          |          |          |                | Human ortholog data |             |               | Database analysis   |  |
|--------------------|----------|------------|-------|----------|----------|----------|----------------|---------------------|-------------|---------------|---------------------|--|
| gi                 | Coverage | # Peptides | # AAs | MW [kDa] | calc. pI | Score    | RefSeq ID      | RefSeq ID           | Gene symbol | Cllome        | Contamination check |  |
| 187370717          | 56.42    | 1274       | 553   | 59.7     | 9.19     | 62366.54 | ACD02421.1     | NP_001001937.1      | ATP5A1      | -             | Mitochondrion       |  |
| 194037554          | 70.64    | 800        | 528   | 56.3     | 5.27     | 38671.07 | XP_001929445.1 | NP_001677.2         | ATP5B       | Yes (9+2/9+0) | Mitochondrion       |  |
| 47523756           | 56.20    | 563        | 1178  | 129.5    | 6.83     | 26589.87 | NP_999514.1    | NP_071504.2         | PC          | Yes (9+0)     | Mitochondrion       |  |
| 194044029          | 57.07    | 487        | 573   | 60.9     | 5.87     | 23555.83 | XP_001928634.1 | NP_955472.1         | HSPD1       | Yes (9+2/9+0) | Mitochondrion       |  |
| 47522754           | 48.62    | 440        | 763   | 83.1     | 9.20     | 21314.37 | NP_999127.1    | NP_000173.2         | HADHA       | -             | Mitochondrion       |  |
| 187370723          | 48.62    | 432        | 763   | 83.2     | 9.20     | 21057.67 | ACD02424.1     | NP_000173.2         | HADHA       | -             | Mitochondrion       |  |
| 283443670          | 43.58    | 437        | 1021  | 112.7    | 5.58     | 20945.70 | ADB19852.1     | NP_000692.2         | ATP1A1      | Yes (9+2/9+0) |                     |  |
| 242253868          | 23.58    | 636        | 246   | 25.9     | 7.18     | 17353.28 | NP_001156363.1 | NP_002762.2         | PRSS3       | -             | Trypsin             |  |
| 112980819          | 47.70    | 264        | 499   | 54.8     | 7.59     | 14597.04 | ABI29191.1     | NP_004159.2         | SDHA        | -             | Mitochondrion       |  |
| 89574201           | 49.91    | 267        | 541   | 59.0     | 6.57     | 14553.23 | ABD77326.1     | NP_004159.2         | SDHA        | -             | Mitochondrion       |  |
| 47523888           | 52.35    | 275        | 298   | 32.9     | 9.80     | 13667.26 | NP_999583.1    | NP_001142.2         | SLC25A4     | -             | Mitochondrion       |  |
| 284009806          | 42.75    | 286        | 1020  | 112.1    | 5.66     | 13461.03 | NP_001165012.1 | NP_000693.1         | ATP1A2      | Yes (9+2/9+0) |                     |  |
| 47522750           | 71.38    | 237        | 283   | 30.7     | 8.54     | 12982.50 | NP_999125.1    | NP_003365.1         | VDAC1       | -             | Mitochondrion       |  |
| 45269029           | 57.67    | 282        | 404   | 44.8     | 5.83     | 12819.44 | AAS55927.1     | NP_001092.1         | ACTB        | Yes (9+2/9+0) |                     |  |
| 194038726          | 60.45    | 214        | 531   | 57.8     | 7.85     | 11883.86 | XP_001929120.1 | NP_002645.3         | PKM2        | Yes (9+2/9+0) |                     |  |
| 194038730          | 55.37    | 196        | 531   | 58.0     | 7.71     | 10961.99 | XP_001929125.1 | NP_002645.3         | PKM2        | Yes (9+2/9+0) |                     |  |
| 47522630           | 47.67    | 228        | 430   | 47.4     | 9.01     | 10848.51 | NP_999093.1    | NP_002071.2         | GOT2        | -             | Mitochondrion       |  |
| 48675943           | 39.66    | 170        | 527   | 59.7     | 8.19     | 10220.16 | NP_001001640.1 | NP_000231.1         | MAOA        | -             | Mitochondrion       |  |
| 47522940           | 29.47    | 200        | 509   | 54.2     | 7.68     | 10189.01 | NP_999227.1    | NP_000099.2         | DLD         | -             | Mitochondrion       |  |
| 47522738           | 49.30    | 226        | 781   | 85.7     | 8.05     | 10184.35 | NP_999119.1    | NP_001089.1         | ACO2        | -             | Mitochondrion       |  |
| 284795272          | 26.53    | 202        | 1014  | 111.7    | 5.41     | 9818.50  | NP_001165224.1 | NP_689509.1         | ATP1A3      | Yes (9+2/9+0) |                     |  |
| 262072947          | 39.30    | 179        | 313   | 33.2     | 8.95     | 9237.20  | BAI47781.1     | NP_000099.2         | DLD         | -             | Mitochondrion       |  |
| 194040124          | 53.64    | 221        | 453   | 50.4     | 4.86     | 9143.33  | XP_001925125.1 | NP_821133.1         | TUBB        | Yes (9+2/9+0) |                     |  |
| 194043400          | 46.58    | 192        | 2044  | 230.4    | 6.74     | 9005.07  | XP_001929604.1 | NP_477352.2         | PI4KA       | Yes (9+0)     |                     |  |
| 81174757           | 31.14    | 172        | 167   | 18.7     | 7.02     | 8881.72  | ABB58920.1     | NP_116093.1         | TUBA1C      | -             |                     |  |
| 90569223           | 47.70    | 160        | 174   | 19.5     | 5.77     | 8850.57  | ABD94500.1     | NP_006073.2         | TUBA1B      | Yes (9+2/9+0) |                     |  |
| 194043861          | 56.42    | 172        | 452   | 50.3     | 5.07     | 8702.13  | XP_001928233.1 | NP_006000.2         | TUBA1A      | Yes (9+2/9+0) |                     |  |
| 194035320          | 42.57    | 162        | 491   | 54.5     | 4.73     | 7609.80  | XP_001924562.1 | NP_525125.2         | TUBA3D      | -             |                     |  |
| 194037939          | 47.50    | 165        | 501   | 56.2     | 4.81     | 6961.95  | XP_001924816.1 | NP_001060.1         | TUBB2A      | Yes (9+2/9+0) |                     |  |
| 112980811          | 42.31    | 146        | 260   | 27.8     | 7.20     | 6575.18  | ABI29187.1     | NP_002037.2         | GAPDH       | Yes (9+2)     |                     |  |
| 4454540            | 55.88    | 146        | 170   | 18.8     | 9.77     | 6092.69  | AAD20940.1     | NP_001142.2         | SLC25A4     | -             | Mitochondrion       |  |
| 148879235          | 50.90    | 144        | 167   | 18.6     | 9.91     | 6022.71  | CAN99572.1     | NP_001143.2         | SLC25A5     | -             | Mitochondrion       |  |
| 47522760           | 60.86    | 127        | 442   | 47.6     | 9.31     | 5712.76  | NP_999131.1    | NP_000174.1         | HADHB       | -             | Mitochondrion       |  |
| 47523786           | 38.87    | 139        | 283   | 30.6     | 8.66     | 5710.45  | NP_999529.1    | NP_005653.3         | VDAC3       | -             | Mitochondrion       |  |
| 47522864           | 30.54    | 116        | 1254  | 144.8    | 8.57     | 5596.55  | NP_999186.1    | NP_004990.3         | MYO6        | Yes (9+0)     |                     |  |
| 113205498          | 26.96    | 106        | 434   | 47.1     | 7.96     | 5568.52  | NP_001037992.1 | NP_001967.3         | ENO3        | -             |                     |  |
| 298160980          | 43.54    | 134        | 441   | 47.8     | 9.51     | 5321.07  | NP_001177161   | NP_001350.1         | DECR1       | -             | Mitochondrion       |  |
| 5052383            | 55.50    | 136        | 191   | 19.9     | 9.25     | 5312.53  | AAD38527.1     | NP_002037.2         | GAPDH       | Yes (9+2)     |                     |  |
| 37934198           | 61.15    | 134        | 296   | 31.8     | 8.13     | 5310.98  | AAP68768.1     | NP_001350.1         | DECR1       | -             | Mitochondrion       |  |
| 295442674          | 58.23    | 134        | 328   | 35.4     | 9.31     | 5302.01  | ADG21261.1     | NP_001350.1         | DECR1       | -             | Mitochondrion       |  |
| 833798             | 56.20    | 121        | 605   | 69.4     | 6.30     | 5266.12  | CAA30970.1     | NP_000468.1         | ALB         | -             | Serum               |  |
| 255683404          | 46.46    | 118        | 452   | 50.8     | 8.69     | 5237.17  | NP_001157479.1 | NP_002159.2         | IDH2        | -             | Mitochondrion       |  |
| 47523600           | 53.00    | 97         | 500   | 56.6     | 8.25     | 5174.30  | NP_999428.1    | NP_000654.2         | ABAT        | -             | Mitochondrion       |  |
| 89574151           | 59.57    | 108        | 282   | 29.5     | 8.10     | 5035.22  | ABD77301.1     | NP_005909.2         | MDH2        | Yes (9+2)     | Mitochondrion       |  |
| 194043055          | 41.13    | 99         | 479   | 52.3     | 6.11     | 4926.57  | XP_001924933.1 | NP_000681.2         | ALDH2       | -             | Mitochondrion       |  |
| 47522774           | 45.98    | 105        | 733   | 84.7     | 5.01     | 4844.08  | NP_999138.1    | NP_001017963.2      | HSP90AA1    | Yes (9+2/9+0) |                     |  |
| 47522682           | 53.80    | 100        | 539   | 58.6     | 7.64     | 4838.74  | NP_999066.1    | NP_000523.2         | PCCB        | -             | Mitochondrion       |  |
| 47523016           | 39.55    | 99         | 804   | 92.5     | 4.83     | 4833.64  | NP_999268.1    | NP_003290.1         | HSP90B1     | Yes (9+2/9+0) |                     |  |
| 88683157           | 46.28    | 103        | 296   | 32.9     | 6.28     | 4696.74  | CAJ77723.1     | NP_116093.1         | TUBA1C      | -             |                     |  |
| 217039113          | 36.79    | 104        | 1245  | 139.0    | 6.90     | 4602.43  | ACJ76845.1     | NP_005327.1         | HDLBP       | Yes (9+0)     |                     |  |
| 164541             | 53.36    | 97         | 298   | 31.8     | 8.27     | 4528.76  | AAA31071.1     | NP_005909.2         | MDH2        | Yes (9+2)     | Mitochondrion       |  |
| 47523794           | 54.42    | 113        | 294   | 31.6     | 7.56     | 4429.99  | NP_999534.1    | NP_001171712.1      | VDAC2       | -             | Mitochondrion       |  |
| 49274643           | 32.31    | 64         | 520   | 58.2     | 8.13     | 4421.82  | NP_001001864.1 | NP_000889.3         | MAOB        | -             | Mitochondrion       |  |
| 153792600          | 32.52    | 93         | 2512  | 272.1    | 6.42     | 4171.04  | NP_001093400.1 | NP_004095.4         | FASN        | Yes (9+0)     |                     |  |
| 194036470          | 50.00    | 77         | 256   | 28.6     | 9.47     | 3710.92  | XP_001928906.1 | NP_001679.2         | ATP5F1      | -             | Mitochondrion       |  |
| 47523720           | 40.68    | 64         | 558   | 63.1     | 7.99     | 3682.06  | NP_999495.1    | NP_000166.2         | GPI         | Yes (9+0)     |                     |  |
| 294805368          | 52.13    | 77         | 658   | 73.8     | 8.88     | 3402.27  | ADF42518.1     | NP_000089.1         | CPT2        | -             | Mitochondrion       |  |
| 194039391          | 37.02    | 49         | 724   | 83.2     | 5.03     | 3302.08  | XP_001929605.1 | NP_031381.2         | HSP90AB1    | Yes (9+2/9+0) |                     |  |
| 47522680           | 46.72    | 72         | 944   | 106.6    | 6.02     | 3291.18  | NP_999069.1    | NP_938149.2         | GANAB       | Yes (9+0)     |                     |  |
| 194033595          | 39.94    | 70         | 666   | 73.8     | 5.88     | 3263.17  | XP_001927830.1 | NP_005338.1         | HSPA5       | Yes (9+2/9+0) |                     |  |
| 194041763          | 32.03    | 66         | 793   | 86.8     | 7.03     | 3179.92  | XP_001927564.1 | NP_002851.2         | ALDH18A1    | -             | Mitochondrion       |  |
| 47523762           | 14.02    | 60         | 1220  | 134.6    | 5.86     | 3163.43  | NP_999517.1    | NP_001673.2         | ATP2B1      | Yes (9+2/9+0) |                     |  |
| 194041191          | 43.54    | 67         | 480   | 52.7     | 6.14     | 3106.74  | XP_001926664.1 | NP_003356.2         | UQCRC1      | -             | Mitochondrion       |  |
| 47523626           | 43.55    | 66         | 806   | 89.2     | 5.26     | 3056.19  | NP_999445.1    | NP_009057.1         | VCP         | Yes (9+2/9+0) |                     |  |
| 194035831          | 38.81    | 62         | 1224  | 138.4    | 7.66     | 2947.43  | XP_001928742.1 | NP_001091868.1      | COPA        | Yes (9+2/9+0) |                     |  |
| 47522898           | 32.07    | 65         | 421   | 46.3     | 8.68     | 2872.51  | NP_999204.1    | NP_001120800.1      | ACADM       | Yes (9+2/9+0) | Mitochondrion       |  |
| 194042498          | 34.64    | 64         | 1403  | 161.1    | 6.40     | 2861.82  | XP_001926058.1 | NP_038479.1         | MYOF        | Yes (9+0)     |                     |  |
| 164518958          | 58.98    | 59         | 334   | 36.6     | 5.86     | 2742.65  | NP_001106758.1 | NP_002291.1         | LDHB        | Yes (9+0)     |                     |  |
| 57527987           | 39.86    | 62         | 577   | 67.6     | 6.68     | 2703.18  | NP_001009578.1 | NP_002435.1         | MSN         | Yes (9+2/9+0) |                     |  |
| 47522814           | 23.03    | 49         | 647   | 69.0     | 7.97     | 2691.73  | NP_999159.1    | NP_001922.2         | DLAT        | Yes (9+2)     | Mitochondrion       |  |
| 194033625          | 41.77    | 70         | 632   | 71.5     | 6.68     | 2690.59  | XP_001924858.1 | NP_001027392.1      | STXBP1      | Yes (9+0)     |                     |  |
| 194043700          | 28.20    | 54         | 532   | 60.5     | 8.72     | 2540.53  | XP_001927726.1 | NP_001063.2         | UGT1A6      | -             |                     |  |
| 194037604          | 27.59    | 57         | 1225  | 136.0    | 5.97     | 2525.45  | XP_001927856.1 | NP_060918.2         | CAND1       | Yes (9+0)     |                     |  |
| 194036657          | 21.42    | 56         | 1849  | 208.6    | 5.83     | 2449.70  | XP_001928045.1 | NP_006412.2         | ARFGEF1     | Yes (9+0)     |                     |  |
| 166244455          | 42.82    | 53         | 439   | 48.4     | 6.90     | 2436.27  | ABY86572.1     | NP_000265.1         | OAT         | Yes (9+0)     | Mitochondrion       |  |
| 35384836           | 71.66    | 49         | 314   | 32.9     | 7.97     | 2423.76  | AAQ84564.1     | NP_000117.1         | ETFA        | -             | Mitochondrion       |  |
| 194043180          | 28.25    | 54         | 963   | 106.1    | 5.12     | 2417.35  | XP_001925929.1 | NP_001025177.1      | AP2B1       | Yes (9+0)     |                     |  |
| 47523768           | 61.89    | 60         | 454   | 52.4     | 7.62     | 2371.34  | NP_999520.1    | NP_000111.1         | EPHX1       | -             |                     |  |
| 281427372          | 38.48    | 44         | 421   | 47.5     | 8.94     | 2321.76  | NP_001163994.1 | NP_000131.2         | FECH        | Yes (9+0)     | Mitochondrion       |  |
| 194042320          | 33.30    | 55         | 916   | 102.3    | 6.74     | 2307.52  | XP_001929048.1 | NP_000180.2         | HK2         | -             | Mitochondrion       |  |
| 297591979          | 42.82    | 51         | 439   | 48.5     | 6.90     | 2281.81  | NP_001172070   | NP_000265.1         | OAT         | Yes (9+0)     | Mitochondrion       |  |
| 194033419          | 32.17    | 49         | 373   | 44.4     | 6.40     | 2252.47  | XP_001924268.1 | NP_001104547.1      | EZR         | -             |                     |  |

|           |       |    |      |       |      |         |                |                |          |               |               |
|-----------|-------|----|------|-------|------|---------|----------------|----------------|----------|---------------|---------------|
| 256838109 | 29.64 | 48 | 361  | 40.0  | 9.32 | 2250.57 | NP_001157984.1 | NP_002626.1    | SLC25A3  | Yes (Global)  | Mitochondrion |
| 281427374 | 51.96 | 47 | 535  | 57.4  | 6.54 | 2235.57 | NP_001163991.1 | NP_006422.1    | CCT2     | Yes (9+2/9+0) |               |
| 194039357 | 20.18 | 46 | 1204 | 136.2 | 5.54 | 2208.32 | XP_001929500.1 | NP_065801.1    | XPO5     | Yes (9+0)     |               |
| 47522610  | 36.54 | 46 | 520  | 56.4  | 8.27 | 2206.56 | NP_999103.1    | NP_000427.1    | OXCT1    | -             | Mitochondrion |
| 194043064 | 32.74 | 48 | 1283 | 139.9 | 6.76 | 2200.10 | XP_001925307.1 | NP_006827.1    | GCN1L1   | -             |               |
| 194044286 | 38.87 | 47 | 746  | 83.0  | 5.14 | 2153.66 | XP_001926037.1 | NP_001036041.1 | RRBP1    | Yes (9+2/9+0) |               |
| 47523618  | 46.34 | 65 | 464  | 51.6  | 8.06 | 2130.13 | NP_999441.1    | NP_004068.2    | CS       | -             | Mitochondrion |
| 194038542 | 48.78 | 48 | 533  | 57.6  | 8.24 | 2111.25 | XP_001929208.1 | NP_005580.1    | ALDH6A1  | -             | Mitochondrion |
| 47522692  | 36.98 | 51 | 430  | 47.9  | 7.39 | 2095.52 | NP_999062.1    | NP_001599.1    | ACADL    | -             | Mitochondrion |
| 56792845  | 38.62 | 52 | 189  | 20.7  | 5.20 | 2063.80 | AAW30622.1     | NP_997195.1    | TUBA3E   | -             |               |
| 194039315 | 22.99 | 42 | 1092 | 120.8 | 6.61 | 2048.16 | XP_001926726.1 | NP_002812.2    | PTK7     | Yes (9+2/9+0) |               |
| 57527982  | 20.93 | 40 | 583  | 68.5  | 6.27 | 1967.97 | NP_001009576.1 | NP_002897.1    | RDX      | Yes (9+2/9+0) |               |
| 47523670  | 33.38 | 43 | 737  | 80.1  | 8.03 | 1957.09 | NP_999471.1    | NP_000405.1    | HSD17B4  | -             |               |
| 194033415 | 64.38 | 34 | 233  | 27.3  | 5.97 | 1953.12 | XP_001928755.1 | NP_001104547.1 | EZR      | -             |               |
| 194038427 | 16.79 | 46 | 2138 | 246.8 | 5.29 | 1892.55 | XP_001927057.1 | NP_001020029.1 | SPTB     | Yes (9+0)     | Serum         |
| 194037873 | 9.31  | 40 | 623  | 67.4  | 6.84 | 1875.35 | XP_001925764.1 | NP_062832.1    | GPR162   | -             |               |
| 194041602 | 25.93 | 45 | 405  | 44.3  | 9.66 | 1870.76 | XP_001926332.1 | NP_001600.1    | ACADSB   | -             | Mitochondrion |
| 47523464  | 30.07 | 38 | 439  | 48.8  | 5.71 | 1864.84 | NP_999353.1    | NP_005207.2    | DDOST    | Yes (9+0)     |               |
| 47523114  | 50.60 | 49 | 334  | 36.4  | 6.58 | 1864.09 | NP_999039.1    | NP_005908.1    | MDH1     | Yes (9+2/9+0) |               |
| 194039421 | 10.32 | 53 | 252  | 28.5  | 5.78 | 1827.29 | XP_001927000.1 | NP_058625.2    | CLIC5    | -             |               |
| 54020966  | 52.21 | 44 | 339  | 38.5  | 6.93 | 1815.71 | NP_001005726.1 | NP_001002858.1 | ANXA2    | Yes (9+2/9+0) |               |
| 1900      | 28.71 | 35 | 303  | 35.1  | 8.53 | 1734.32 | CAA27575.1     | NP_001668.1    | ATP1B1   | Yes (9+0)     |               |
| 194042318 | 30.10 | 36 | 917  | 102.4 | 6.73 | 1700.42 | XP_001928917.1 | NP_079406.3    | HKDC1    | Yes (9+0)     |               |
| 164669    | 33.33 | 39 | 417  | 45.1  | 5.58 | 1677.94 | AAA31120.1     | NP_003839.2    | SUCLG2   | -             | Mitochondrion |
| 47523726  | 35.86 | 34 | 608  | 68.7  | 6.55 | 1672.20 | NP_999498.1    | NP_002941.1    | RPN1     | Yes (9+0)     |               |
| 194033647 | 26.97 | 32 | 864  | 97.2  | 6.87 | 1629.01 | XP_001928157.1 | NP_004399.2    | DNM1     | Yes (9+2/9+0) |               |
| 194042126 | 21.73 | 40 | 1376 | 166.0 | 6.71 | 1627.65 | XP_001928377.1 | NP_003741.1    | EIF3A    | Yes (9+2/9+0) |               |
| 113205650 | 30.00 | 35 | 780  | 85.3  | 8.18 | 1614.54 | NP_001038015.1 | NP_000280.1    | PFKM     | Yes (9+0)     |               |
| 38569762  | 36.96 | 40 | 46   | 4.9   | 5.11 | 1606.21 | AAR24399.1     | NP_004083.3    | ECHS1    | -             | Mitochondrion |
| 194037849 | 18.36 | 37 | 1514 | 167.8 | 6.29 | 1600.25 | XP_001925235.1 | NP_000005.2    | A2M      | -             | Serum         |
| 833800    | 32.47 | 34 | 696  | 76.9  | 7.03 | 1598.88 | CAA30943.1     | NP_001054.1    | TF       | -             |               |
| 1921      | 24.47 | 35 | 997  | 109.7 | 5.36 | 1594.81 | CAA33169.1     | NP_733765.1    | ATP2A2   | Yes (9+2/9+0) |               |
| 194034783 | 42.50 | 33 | 320  | 36.0  | 9.20 | 1585.75 | XP_001924385.1 | NP_067022.1    | SQRDL    | -             | Mitochondrion |
| 194042284 | 47.20 | 28 | 322  | 35.0  | 6.60 | 1578.17 | XP_001925338.1 | NP_005262.1    | GLUD1    | -             | Mitochondrion |
| 194038105 | 13.03 | 36 | 1665 | 188.2 | 6.28 | 1557.41 | XP_001925566.1 | NP_006026.3    | CDC42BPB | Yes (9+2/9+0) |               |
| 68445604  | 16.80 | 37 | 1851 | 214.8 | 8.44 | 1549.94 | BAE03307.1     | NP_001135967.1 | MYO5A    | Yes (9+2/9+0) |               |
| 288860138 | 22.56 | 38 | 953  | 107.1 | 6.13 | 1525.19 | NP_001165837.1 | NP_001137533.1 | COPB1    | Yes (9+0)     |               |
| 148747288 | 59.94 | 35 | 322  | 35.6  | 9.23 | 1522.53 | NP_001092072.1 | NP_073591.2    | SFXN1    | -             | Mitochondrion |
| 164543    | 52.94 | 36 | 289  | 31.7  | 6.57 | 1504.67 | AAA31072.1     | NP_005908.1    | MDH1     | Yes (9+2/9+0) |               |
| 95117652  | 31.18 | 33 | 744  | 81.6  | 8.27 | 1472.88 | ABF57019.1     | NP_000280.1    | PFKM     | Yes (9+0)     |               |
| 194041527 | 31.99 | 26 | 572  | 62.3  | 6.38 | 1466.69 | XP_001927831.1 | NP_001377.1    | DPYSL2   | -             |               |
| 194040685 | 20.35 | 27 | 1081 | 121.7 | 6.97 | 1449.04 | XP_001926818.1 | NP_002262.3    | IPO5     | -             |               |
| 48675953  | 29.44 | 30 | 445  | 50.2  | 4.70 | 1441.61 | NP_001001643.1 | NP_001485.2    | GDI2     | -             |               |
| 47523848  | 26.37 | 37 | 455  | 48.9  | 8.82 | 1439.55 | NP_999562.1    | NP_001924.2    | DLST     | -             | Mitochondrion |
| 194042529 | 10.96 | 29 | 894  | 103.7 | 5.45 | 1431.12 | XP_001927307.1 | NP_001094.1    | ACTN2    | -             |               |
| 154101332 | 38.28 | 33 | 128  | 14.6  | 9.72 | 1429.92 | ABS58492.1     | NP_000775.1    | CYP27A1  | -             | Mitochondrion |
| 194036006 | 29.00 | 30 | 531  | 59.2  | 7.36 | 1403.29 | XP_001926412.1 | NP_005989.3    | CCT3     | Yes (9+2/9+0) |               |
| 163915141 | 28.12 | 32 | 626  | 70.8  | 8.35 | 1374.22 | NP_001106518.1 | NP_000746.2    | CRAT     | -             | Mitochondrion |
| 194044007 | 29.36 | 30 | 596  | 66.3  | 8.13 | 1373.89 | XP_001924775.1 | NP_055720.3    | GLS      | Yes (9+0)     | Mitochondrion |
| 47523864  | 28.53 | 32 | 750  | 83.3  | 8.19 | 1373.12 | NP_999570.1    | NP_000246.2    | MUT      | Yes (9+0)     | Mitochondrion |
| 194039401 | 27.21 | 33 | 985  | 106.9 | 6.51 | 1367.83 | XP_001929628.1 | NP_065796.1    | AARS2    | -             | Mitochondrion |
| 178056753 | 25.76 | 26 | 854  | 97.4  | 7.49 | 1352.27 | NP_001116644.1 | NP_002854.3    | PYGL     | -             |               |
| 7547271   | 45.14 | 25 | 175  | 20.0  | 6.84 | 1349.22 | AAB35333.2     | NP_055720.3    | GLS      | Yes (9+0)     | Mitochondrion |
| 264681456 | 39.44 | 28 | 426  | 46.6  | 7.85 | 1338.76 | NP_001161107.1 | NP_002216.2    | IVD      | -             | Mitochondrion |
| 153792027 | 47.48 | 24 | 417  | 44.5  | 7.90 | 1316.24 | NP_001093402.1 | NP_000282.1    | PGK1     | Yes (9+2/9+0) |               |
| 194042961 | 17.19 | 29 | 1059 | 118.2 | 8.35 | 1301.53 | XP_001929589.1 | NP_001130010.1 | ACAD10   | Yes (9+2/9+0) |               |
| 194037640 | 25.84 | 25 | 770  | 85.2  | 7.59 | 1300.79 | XP_001926622.1 | NP_036322.2    | ALDH1L1  | -             |               |
| 194035060 | 18.40 | 28 | 1793 | 193.0 | 6.10 | 1299.51 | XP_001924346.1 | NP_055874.2    | TLN2     | Yes (9+0)     |               |
| 194039730 | 47.49 | 32 | 537  | 57.7  | 8.28 | 1299.49 | XP_001928195.1 | NP_001071.1    | ALDH5A1  | -             | Mitochondrion |
| 178056732 | 43.10 | 22 | 355  | 40.4  | 5.54 | 1282.65 | NP_001116588.1 | NP_002061.1    | GNAI2    | Yes (9+2/9+0) |               |
| 264681432 | 57.99 | 26 | 319  | 35.8  | 5.92 | 1280.04 | NP_001161111.1 | NP_001144.1    | ANXA4    | Yes (9+2/9+0) |               |
| 194042272 | 46.82 | 23 | 299  | 32.7  | 7.01 | 1273.72 | XP_001925088.1 | NP_005262.1    | GLUD1    | -             | Mitochondrion |
| 19919838  | 39.91 | 28 | 431  | 48.1  | 6.89 | 1270.06 | AAM08402.1     | NP_055720.3    | GLS      | Yes (9+0)     | Mitochondrion |
| 51592133  | 21.20 | 24 | 618  | 68.4  | 5.58 | 1266.73 | NP_001004042.1 | NP_001681.2    | ATP6V1A  | Yes (9+2/9+0) |               |
| 281427370 | 41.44 | 27 | 543  | 59.4  | 7.15 | 1264.63 | NP_001163993.1 | NP_006420.1    | CCT7     | Yes (9+2/9+0) |               |
| 47522686  | 17.68 | 25 | 413  | 44.8  | 8.13 | 1246.59 | NP_999063.1    | NP_000008.1    | ACADS    | Yes (9+2/9+0) | Mitochondrion |
| 194043981 | 18.97 | 26 | 1128 | 128.8 | 6.62 | 1238.57 | XP_001928589.1 | NP_995314.1    | NCKAP1   | Yes (9+0)     |               |
| 194043678 | 22.88 | 25 | 953  | 105.7 | 5.39 | 1222.71 | XP_001925937.1 | NP_002798.2    | PSMD1    | Yes (9+0)     |               |
| 147223308 | 17.72 | 27 | 632  | 69.3  | 8.02 | 1218.08 | CAN13201.1     | NP_536350.2    | GNAS     | Yes (9+2/9+0) |               |
| 47522618  | 20.90 | 29 | 1067 | 116.8 | 6.16 | 1202.85 | NP_999099.1    | NP_054706.1    | VCL      | Yes (9+0)     |               |
| 91214448  | 78.82 | 22 | 203  | 21.8  | 6.39 | 1199.86 | ABE27954.1     | NP_001152759.1 | TPI1     | Yes (9+0)     |               |
| 146741316 | 15.74 | 30 | 1201 | 135.5 | 7.21 | 1188.26 | BAF62313.1     | NP_003929.4    | AP3D1    | Yes (9+0)     |               |
| 194037097 | 41.54 | 31 | 260  | 29.2  | 7.01 | 1185.00 | XP_001927840.1 | NP_000058.1    | CA2      | Yes (9+0)     |               |
| 178056466 | 26.85 | 26 | 447  | 50.8  | 8.07 | 1184.59 | NP_001116555.1 | NP_000700.1    | BCKDHA   | -             | Mitochondrion |
| 47523308  | 26.52 | 27 | 641  | 70.1  | 5.82 | 1180.83 | NP_998931.1    | NP_005337.2    | HSPA1B   | Yes (9+2/9+0) | Mitochondrion |
| 113205874 | 59.15 | 19 | 213  | 23.4  | 9.96 | 1176.04 | NP_001038071.1 | NP_001688.1    | ATP5O    | -             | Mitochondrion |
| 194036880 | 26.35 | 26 | 463  | 52.5  | 6.84 | 1164.62 | XP_001927701.1 | NP_004541.1    | NDUFS2   | -             | Mitochondrion |
| 190360601 | 37.59 | 28 | 423  | 48.3  | 7.87 | 1157.66 | NP_001121914.1 | NP_001473.1    | GATM     | -             | Mitochondrion |
| 194044193 | 17.73 | 26 | 1455 | 158.3 | 7.23 | 1155.59 | XP_001926385.1 | NP_000028.3    | ANK1     | Yes (9+2/9+0) | Serum         |
| 194044406 | 19.72 | 26 | 791  | 89.5  | 7.05 | 1150.85 | XP_001927066.1 | NP_002827.1    | PTPRA    | Yes (9+0)     |               |
| 4102210   | 37.93 | 24 | 87   | 9.4   | 9.86 | 1147.20 | AAD01440.1     | NP_003553.2    | SLC25A11 | -             | Mitochondrion |
| 47523722  | 46.18 | 21 | 314  | 34.1  | 9.00 | 1145.52 | NP_999496.1    | NP_005318.3    | HADH     | Yes (Global)  | Mitochondrion |
| 178056512 | 18.10 | 24 | 641  | 70.3  | 6.35 | 1103.02 | NP_001116600.1 | NP_005518.3    | HSPA1L   | Yes (9+2/9+0) |               |
| 223950621 | 11.70 | 19 | 1128 | 118.6 | 5.66 | 1084.52 | NP_001138854.1 | NP_001092004.1 | BAT3     | Yes (9+0)     |               |
| 68124034  | 31.07 | 25 | 309  | 33.6  | 6.80 | 1084.17 | CAJ03391.1     | NP_001393.1    | EEF1A1   | Yes (9+2/9+0) |               |

|           |       |    |      |       |       |         |                |                |          |               |               |
|-----------|-------|----|------|-------|-------|---------|----------------|----------------|----------|---------------|---------------|
| 1616950   | 19.13 | 25 | 920  | 102.4 | 7.43  | 1082.36 | AAB16869.1     | NP_000623.2    | ITGAM    | -             |               |
| 194042197 | 33.94 | 24 | 218  | 24.3  | 9.16  | 1079.28 | XP_001925957.1 | NP_115709.3    | C10orf58 | Yes (9+0)     |               |
| 194044118 | 41.89 | 24 | 475  | 55.4  | 6.15  | 1069.62 | XP_001924839.1 | NP_064505.1    | UGGT1    | -             |               |
| 148225750 | 23.86 | 22 | 859  | 96.6  | 5.41  | 1066.53 | NP_001090973.1 | NP_006635.2    | HSPH1    | -             |               |
| 194043684 | 16.67 | 27 | 360  | 40.4  | 6.18  | 1044.04 | XP_001926541.1 | NP_002233.2    | KCNJ13   | -             |               |
| 118403904 | 26.46 | 19 | 189  | 19.9  | 6.79  | 1042.96 | NP_001072131.1 | NP_009193.2    | PARK7    | Yes (9+0)     |               |
| 194043642 | 15.15 | 19 | 904  | 101.4 | 6.02  | 1042.93 | XP_001925117.1 | NP_001165906.1 | RAB3GAP1 | Yes (9+0)     |               |
| 194042134 | 20.99 | 10 | 243  | 26.6  | 7.28  | 1037.11 | XP_001928552.1 | NP_006784.1    | PRDX3    | Yes (9+2/9+0) | Mitochondrion |
| 47523792  | 25.99 | 25 | 781  | 85.5  | 5.86  | 1031.46 | NP_999532.1    | NP_001091679.1 | CTNNB1   | Yes (9+2/9+0) |               |
| 194041957 | 30.86 | 17 | 499  | 55.4  | 5.40  | 1025.25 | XP_001929355   | NP_116116.1    | INA      | Yes (9+0)     |               |
| 106073338 | 27.36 | 18 | 731  | 84.0  | 6.52  | 1017.04 | ABF81978.1     | NP_005600.1    | PYGM     | Yes (9+0)     |               |
| 47523818  | 26.85 | 20 | 499  | 56.4  | 7.25  | 1010.86 | NP_999546.1    | NP_742127.1    | CAMK2D   | Yes (9+2/9+0) |               |
| 76097691  | 41.08 | 24 | 297  | 34.3  | 4.87  | 1000.87 | ABA39527.1     | NP_003371.2    | VIM      | Yes (9+0)     |               |
| 1236646   | 20.88 | 23 | 455  | 49.3  | 6.06  | 989.27  | AAC48775.1     |                |          |               | Serum         |
| 118403792 | 49.30 | 23 | 357  | 39.1  | 5.62  | 987.02  | NP_001072151.1 | NP_057334.1    | NDRG2    | Yes (9+0)     |               |
| 52631983  | 34.42 | 19 | 337  | 37.5  | 6.30  | 985.81  | AAU85385.1     | NP_004437.2    | EPRS     | Yes (9+0)     |               |
| 50979303  | 26.84 | 17 | 503  | 57.3  | 6.74  | 983.83  | NP_999466.1    | NP_001743.1    | CAT      | Yes (9+0)     |               |
| 47523306  | 22.72 | 18 | 757  | 88.1  | 6.27  | 983.58  | NP_998934.1    | NP_009330.1    | STAT1    | -             |               |
| 171465894 | 17.25 | 15 | 568  | 61.6  | 5.69  | 980.45  | ACB46190.1     | NP_001012679.1 | SLC3A2   | Yes (9+0)     |               |
| 47522660  | 34.37 | 17 | 579  | 62.8  | 7.62  | 969.59  | NP_999079.1    | NP_001432.2    | FAAH     | Yes (9+0)     |               |
| 194044375 | 14.09 | 18 | 646  | 70.4  | 7.71  | 968.09  | XP_001927148.1 | NP_115890.2    | ACSS1    | -             | Mitochondrion |
| 178056392 | 27.40 | 15 | 354  | 40.5  | 5.69  | 958.51  | NP_001116589.1 | NP_006487.1    | GNAI3    | Yes (9+2/9+0) |               |
| 190360675 | 27.63 | 20 | 427  | 47.3  | 7.81  | 953.98  | NP_001121955.1 | NP_005794.1    | FLOT1    | -             |               |
| 194042491 | 18.53 | 24 | 1009 | 116.9 | 6.46  | 947.66  | XP_001925416.1 | NP_004960.2    | IDE      | -             |               |
| 2997739   | 59.76 | 18 | 82   | 9.4   | 7.05  | 933.97  | AAC08590.1     | NP_005150.1    | ACTC1    | Yes (9+2/9+0) |               |
| 195972993 | 16.35 | 16 | 685  | 77.1  | 6.65  | 931.03  | NP_001124446.1 | NP_003147.2    | STIM1    | Yes (9+0)     |               |
| 194035330 | 15.97 | 20 | 864  | 97.3  | 8.38  | 928.45  | XP_001924430.1 | NP_056138.1    | KIAA0776 | Yes (9+0)     |               |
| 194044120 | 53.61 | 23 | 360  | 40.9  | 5.64  | 927.81  | XP_001924866.1 | NP_064505.1    | UGGT1    | -             |               |
| 178056550 | 26.64 | 24 | 533  | 56.8  | 6.89  | 925.57  | NP_001116634.1 | NP_006614.2    | PHGDH    | Yes (9+0)     |               |
| 194041349 | 18.21 | 17 | 280  | 30.3  | 9.16  | 921.67  | XP_001926718.1 | NP_001001331.1 | ATP2B2   | Yes (9+2/9+0) |               |
| 194037880 | 29.52 | 22 | 664  | 73.5  | 5.38  | 917.17  | XP_001925819.1 | NP_003931.2    | USP13    | -             |               |
| 194036093 | 19.54 | 20 | 609  | 68.4  | 8.38  | 900.60  | XP_001926976.1 | NP_065385.2    | PBXIP1   | -             |               |
| 194034213 | 16.21 | 16 | 833  | 95.8  | 6.70  | 889.49  | XP_001926027.1 | NP_055807.1    | DAAM1    | Yes (9+0)     |               |
| 194039491 | 25.96 | 16 | 366  | 39.6  | 7.15  | 879.55  | XP_001927373.1 | NP_005521.1    | IDH3A    | -             | Mitochondrion |
| 194035054 | 21.94 | 17 | 556  | 61.8  | 8.85  | 878.97  | XP_001929115.1 | NP_116246.2    | LACTB    | -             | Mitochondrion |
| 194040871 | 12.57 | 20 | 1575 | 171.5 | 6.99  | 870.67  | XP_001924275.1 | NP_056281.1    | PTPN23   | Yes (9+0)     |               |
| 194033403 | 38.31 | 22 | 556  | 60.3  | 5.99  | 869.34  | XP_001928240.1 | NP_110379.2    | TCP1     | Yes (9+2/9+0) |               |
| 157427728 | 15.99 | 15 | 1076 | 117.8 | 7.43  | 867.53  | NP_001098772.1 | NP_001087.2    | ACLY     | Yes (9+0)     |               |
| 194033639 | 36.83 | 19 | 372  | 41.8  | 9.25  | 863.32  | XP_001927971.1 | NP_079348.1    | PTGES2   | Yes (9+0)     |               |
| 194041569 | 5.18  | 14 | 1970 | 216.6 | 6.30  | 859.42  | XP_001926837.1 | NP_056069.2    | KIF13B   | -             |               |
| 194034221 | 27.43 | 21 | 339  | 38.1  | 8.75  | 842.06  | XP_001928783.1 | NP_057113.1    | DHRS7    | Yes (9+0)     |               |
| 47522636  | 33.41 | 16 | 413  | 46.4  | 7.20  | 837.76  | NP_999092.1    | NP_002070.1    | GOT1     | Yes (9+0)     |               |
| 291622246 | 33.33 | 23 | 417  | 48.3  | 4.46  | 833.09  | NP_001167604.1 | NP_004334.1    | CALR     | Yes (9+0)     |               |
| 197251946 | 22.97 | 17 | 418  | 47.4  | 5.88  | 827.85  | NP_001127815.1 | NP_005712.1    | ACTR3    | Yes (9+2/9+0) |               |
| 194043438 | 28.24 | 22 | 386  | 42.6  | 9.17  | 827.33  | XP_001927482.1 | NP_005975.1    | SLC25A1  | -             | Mitochondrion |
| 194036351 | 8.08  | 20 | 1832 | 196.9 | 5.34  | 823.98  | XP_001926434.1 | NP_0077719.2   | NOTCH2   | -             |               |
| 194042314 | 15.34 | 15 | 789  | 88.0  | 8.27  | 819.68  | XP_001928933.1 | NP_003162.2    | SUPV3L1  | -             | Mitochondrion |
| 147780441 | 10.57 | 17 | 1741 | 192.3 | 7.15  | 813.50  | CAN59660.1     | NP_009224.2    | C4A      | -             | Serum         |
| 194041795 | 41.02 | 15 | 256  | 29.0  | 7.18  | 812.74  | XP_001928790.1 | NP_002620.1    | PGAM1    | Yes (9+0)     |               |
| 194042063 | 20.69 | 19 | 836  | 92.9  | 5.24  | 801.64  | XP_001927134.1 | NP_001001936.1 | AFAP1L2  | -             |               |
| 1304179   | 10.71 | 18 | 448  | 47.3  | 7.05  | 778.33  | BAA07817.1     | NP_000499.1    | FGA      | -             | Serum         |
| 194035289 | 19.34 | 14 | 574  | 62.8  | 6.68  | 777.64  | XP_001927130.1 | NP_002517.1    | NT5E     | Yes (9+2/9+0) |               |
| 2407184   | 13.21 | 17 | 333  | 35.8  | 8.46  | 771.36  | AAB94053.1     | NP_002037.2    | GAPDH    | Yes (9+2)     |               |
| 2258465   | 31.83 | 17 | 333  | 35.0  | 9.23  | 768.51  | AAB94003.1     | NP_003840.2    | SUCLG1   | -             | Mitochondrion |
| 194041803 | 13.69 | 16 | 1030 | 113.1 | 6.24  | 766.78  | XP_001928946.1 | NP_071757.4    | MMS19    | -             |               |
| 194041977 | 12.35 | 15 | 1206 | 138.9 | 5.03  | 763.04  | XP_001929461.1 | NP_055535.2    | SLK      | Yes (9+2/9+0) |               |
| 208972300 | 21.71 | 17 | 152  | 16.9  | 7.75  | 759.32  | ACI32712.1     | NP_008862.1    | SLC2A3   | -             |               |
| 194018678 | 17.55 | 15 | 678  | 76.8  | 5.43  | 745.26  | NP_001123431.1 | NP_000932.3    | POR      | Yes (9+0)     |               |
| 120564445 | 45.08 | 14 | 264  | 28.9  | 6.93  | 745.12  | ABM30148.1     | NP_001389.2    | ECH1     | -             | Mitochondrion |
| 194038734 | 19.08 | 18 | 765  | 86.1  | 7.08  | 743.90  | XP_001929226.1 | NP_006355.2    | SEC23A   | Yes (9+0)     |               |
| 178056478 | 10.35 | 19 | 396  | 43.3  | 6.29  | 742.87  | NP_001116691.1 | NP_000047.1    | BCKDHB   | -             | Mitochondrion |
| 72535190  | 14.15 | 9  | 205  | 22.6  | 7.05  | 739.41  | NP_001026957.1 | NP_004152.1    | RAB1A    | Yes (9+2/9+0) |               |
| 123186755 | 31.04 | 17 | 364  | 40.6  | 6.13  | 727.73  | ABM69185.1     |                |          |               |               |
| 194035996 | 16.20 | 14 | 463  | 52.3  | 9.48  | 723.90  | XP_001924629.1 | NP_839943.2    | IQGAP3   | -             |               |
| 264681430 | 28.97 | 13 | 397  | 41.9  | 8.40  | 722.82  | NP_001161110.1 | NP_006102.2    | ACAA2    | -             | Mitochondrion |
| 194037572 | 26.73 | 15 | 505  | 56.2  | 8.21  | 712.69  | XP_001929492.1 | NP_005403.2    | SHMT2    | Yes (9+2)     | Mitochondrion |
| 85792253  | 29.48 | 15 | 407  | 46.4  | 5.48  | 698.79  | ABC84194.1     | NP_001958.2    | EIF4A2   | Yes (9+2/9+0) |               |
| 155369760 | 25.57 | 18 | 661  | 74.8  | 7.50  | 696.57  | NP_001094498.1 | NP_009223.2    | ACOX1    | Yes (9+0)     |               |
| 113205608 | 23.59 | 15 | 284  | 32.2  | 10.73 | 696.39  | NP_001038007   | NP_000961.2    | RPL6     | -             | Ribosome      |
| 194041249 | 28.74 | 14 | 421  | 46.6  | 8.90  | 694.19  | XP_001925979.1 | NP_060867.2    | CHDH     | -             | Mitochondrion |
| 51592147  | 13.24 | 15 | 710  | 80.7  | 5.85  | 692.68  | NP_001004050.1 | NP_002717.3    | PREP     | Yes (9+0)     |               |
| 194041376 | 10.97 | 9  | 693  | 77.9  | 8.25  | 687.67  | XP_001924800.1 | NP_115545.3    | ACAD11   | -             |               |
| 194035777 | 20.67 | 12 | 421  | 47.2  | 7.33  | 680.63  | XP_001929419.1 | NP_001008661.1 | CCBL2    | -             |               |
| 261532847 | 27.70 | 14 | 361  | 37.7  | 7.25  | 679.94  | ACX85429.1     | NP_006105.1    | TOMM40   | -             | Mitochondrion |
| 47523472  | 10.02 | 12 | 539  | 60.2  | 7.30  | 679.22  | NP_999358.1    | NP_742077.1    | CAMK2B   | -             |               |
| 194041257 | 27.82 | 14 | 266  | 29.3  | 7.83  | 676.34  | XP_001926099.1 | NP_060867.2    | CHDH     | -             | Mitochondrion |
| 47523872  | 14.00 | 15 | 643  | 68.1  | 6.67  | 672.19  | NP_999575.1    | NP_000444.1    | SLC5A5   | -             |               |
| 146741290 | 20.67 | 15 | 358  | 42.0  | 5.68  | 668.90  | BAF62300.1     | NP_002063.2    | GNAQ     | Yes (9+2/9+0) |               |
| 194042806 | 20.65 | 17 | 460  | 49.5  | 6.34  | 666.79  | XP_001927837.1 | NP_001147.1    | ANXA7    | Yes (9+2/9+0) |               |
| 194041218 | 25.38 | 14 | 390  | 45.9  | 8.09  | 664.58  | XP_001928126.1 | NP_001127703.1 | NT5DC2   | -             |               |
| 281324305 | 30.57 | 16 | 350  | 38.7  | 5.35  | 663.35  | ADA60694.1     |                |          |               |               |
| 5052379   | 29.10 | 13 | 189  | 22.0  | 5.25  | 661.81  | AAD38525.1     | NP_001076581.2 | GPD2     | -             | Mitochondrion |
| 212525788 | 17.46 | 15 | 676  | 70.7  | 9.88  | 661.05  | ACJ2765.1      | NP_598006.1    | SYN1     | Yes (9+0)     |               |
| 194034423 | 15.55 | 11 | 463  | 50.9  | 8.69  | 658.23  | XP_001926853.1 | NP_079160.1    | L2HGDH   | Yes (9+0)     | Mitochondrion |
| 194036285 | 21.89 | 14 | 233  | 26.3  | 9.76  | 657.09  | XP_001924916.1 | NP_036245.1    | CA14     | Yes (9+0)     |               |

|           |       |    |      |       |      |        |                |                |          |               |               |
|-----------|-------|----|------|-------|------|--------|----------------|----------------|----------|---------------|---------------|
| 194038709 | 19.85 | 17 | 398  | 44.5  | 7.99 | 656.26 | XP_001928700.1 | NP_036560.1    | NPTN     | Yes (9+0)     |               |
| 194033574 | 13.02 | 19 | 845  | 89.4  | 4.88 | 655.98 | XP_001927353.1 | NP_775960.4    | CRB2     | -             |               |
| 194034593 | 5.95  | 17 | 1058 | 119.3 | 5.57 | 646.88 | XP_001925408.1 | NP_065905.2    | KIAA1468 | -             |               |
| 47522608  | 17.65 | 13 | 629  | 69.2  | 5.95 | 644.85 | NP_999106.1    | NP_002942.2    | RPN2     | Yes (9+0)     |               |
| 11558496  | 13.68 | 15 | 636  | 67.1  | 7.17 | 643.85 | CAC17816.1     | NP_000444.1    | SLC5A5   | -             |               |
| 194035640 | 19.97 | 14 | 741  | 84.6  | 8.48 | 641.97 | XP_001924598.1 | NP_006200.3    | ENPP2    | -             |               |
| 194044626 | 24.39 | 14 | 246  | 28.1  | 4.83 | 641.33 | XP_001927289.1 | NP_003395.1    | YWHAB    | Yes (9+2/9+0) |               |
| 88861940  | 65.75 | 15 | 73   | 7.9   | 8.19 | 636.80 | ABD52877.1     | NP_001606.1    | ACTA2    | Yes (9+2/9+0) |               |
| 194033664 | 26.97 | 13 | 445  | 51.9  | 6.19 | 636.65 | XP_001928746.1 | NP_002531.3    | ODF2     | Yes (9+2/9+0) |               |
| 165973420 | 30.22 | 14 | 364  | 40.3  | 5.76 | 636.01 | NP_001107174.1 |                |          |               |               |
| 113205668 | 52.32 | 13 | 151  | 16.7  | 9.44 | 628.63 | NP_001038021.1 | NP_004519.1    | MGST3    | Yes (9+0)     |               |
| 194041649 | 2.83  | 11 | 741  | 83.5  | 4.88 | 626.99 | XP_001926615.1 | NP_060650.2    | DHX32    | -             | Mitochondrion |
| 5835866   | 20.09 | 9  | 229  | 26.2  | 4.89 | 625.83 | NP_008637.1    | YP_003024029.1 | MT-CO2   | -             | Mitochondrion |
| 98283613  | 26.49 | 13 | 385  | 42.4  | 8.29 | 624.08 | ABF58001.1     | NP_008830.2    | IDH3B    | -             | Mitochondrion |
| 47522772  | 12.31 | 15 | 650  | 74.0  | 5.78 | 623.06 | NP_999137.1    | NP_005177.2    | CAPN1    | Yes (9+2/9+0) |               |
| 194034893 | 29.57 | 15 | 470  | 51.7  | 5.34 | 619.05 | XP_001929453.1 | NP_060615.1    | FAM82A2  | -             | Mitochondrion |
| 178056945 | 8.66  | 11 | 1062 | 118.2 | 7.68 | 618.67 | NP_001116686.1 | NP_065175.4    | VARS2    | -             | Mitochondrion |
| 194042189 | 25.10 | 15 | 502  | 53.9  | 7.30 | 618.46 | XP_001924213.1 | NP_001148.1    | ANXA11   | -             |               |
| 47523958  | 14.76 | 18 | 271  | 28.7  | 7.01 | 612.93 | NP_999619.1    | NP_932766.1    | AQP1     | Yes (9+0)     |               |
| 194040859 | 16.29 | 16 | 798  | 87.6  | 7.37 | 610.94 | XP_001926951.1 | NP_056281.1    | PTPN23   | Yes (9+0)     |               |
| 20378720  | 24.10 | 12 | 361  | 40.1  | 5.94 | 605.93 | AAM20954.1     |                |          |               |               |
| 18699303  | 26.42 | 13 | 352  | 38.9  | 5.36 | 604.78 | AAL78518.1     |                |          |               |               |
| 194043977 | 10.40 | 11 | 1250 | 136.9 | 5.08 | 603.46 | XP_00192844.1  | NP_001123917.1 | SSFA2    | -             |               |
| 89573851  | 23.81 | 12 | 252  | 28.4  | 7.96 | 603.04 | ABD77151.1     | NP_002991.2    | SDHB     | Yes (9+0)     | Mitochondrion |
| 186886352 | 27.67 | 12 | 477  | 53.2  | 7.77 | 597.10 | ACC93575.1     | NP_037518.3    | SLC25A24 | -             | Mitochondrion |
| 194041502 | 20.45 | 14 | 934  | 103.9 | 4.89 | 596.05 | XP_001925857.1 | NP_005373.2    | NEFM     | Yes (9+2/9+0) |               |
| 47522712  | 23.29 | 12 | 322  | 35.6  | 6.38 | 594.26 | NP_999108.1    | NP_003672.1    | PDXK     | Yes (9+0)     |               |
| 288860136 | 31.33 | 13 | 332  | 36.6  | 8.07 | 592.73 | NP_001165834.1 | NP_005557.1    | LDHA     | Yes (9+0)     |               |
| 194040972 | 21.78 | 15 | 381  | 42.7  | 6.80 | 589.42 | XP_001924801.1 | NP_065843.3    | NCEH1    | -             |               |
| 47523628  | 8.31  | 11 | 963  | 108.8 | 5.31 | 587.52 | NP_999442.1    | NP_001141.2    | ANPEP    | -             |               |
| 20378700  | 25.55 | 13 | 364  | 40.6  | 6.80 | 586.35 | AAM20944.1     |                |          |               |               |
| 178056588 | 15.92 | 4  | 201  | 22.1  | 5.73 | 586.30 | NP_001116645.1 | NP_112243.1    | RAB1B    | Yes (9+2/9+0) |               |
| 195539468 | 29.34 | 10 | 259  | 26.7  | 6.04 | 578.75 | NP_001124202.1 | NP_055049.1    | HSD17B8  | Yes (9+0)     |               |
| 194041955 | 17.97 | 13 | 562  | 65.1  | 6.05 | 575.56 | XP_001929313.1 | NP_001127845.1 | NT5C2    | -             |               |
| 194033409 | 26.24 | 12 | 221  | 24.7  | 8.88 | 573.89 | XP_001926475.1 | NP_000627.2    | SOD2     | -             | Mitochondrion |
| 83415427  | 26.10 | 13 | 364  | 40.5  | 5.76 | 572.55 | ABC17921.1     |                |          |               |               |
| 222090428 | 18.64 | 12 | 499  | 55.6  | 9.25 | 567.66 | ACM42422.1     | NP_036345.2    | MLYCD    | Yes (9+0)     | Mitochondrion |
| 194041424 | 10.94 | 11 | 1088 | 124.0 | 6.48 | 567.20 | XP_001926790.1 | NP_001093631.1 | XPO7     | -             |               |
| 211926963 | 25.55 | 12 | 364  | 40.5  | 5.92 | 566.31 | BAG82701.1     |                |          |               |               |
| 258590765 | 4.33  | 13 | 1269 | 133.4 | 8.56 | 566.11 | CAZ66650.1     | NP_003595.1    | IRS4     | -             |               |
| 55926209  | 38.16 | 13 | 207  | 22.9  | 6.70 | 563.68 | NP_001007519.1 | NP_001531.1    | HSPB1    | Yes (9+2/9+0) |               |
| 113205600 | 23.12 | 13 | 359  | 42.0  | 6.23 | 563.38 | NP_001038003.1 | NP_002058.2    | GNA11    | Yes (9+2/9+0) |               |
| 262072813 | 50.70 | 15 | 286  | 31.5  | 8.94 | 561.34 | BAI47714.1     | NP_057226.1    | HSD17B12 | Yes (9+0)     |               |
| 146741296 | 5.25  | 11 | 629  | 65.2  | 8.15 | 560.28 | BAF62303.1     | NP_006112.3    | KRT1     | -             |               |
| 228008282 | 28.68 | 11 | 401  | 45.1  | 4.96 | 559.44 | BAH57697.1     | NP_004148.1    | PRKAR2A  | Yes (9+2/9+0) |               |
| 226533691 | 22.85 | 9  | 407  | 46.1  | 7.55 | 558.96 | NP_001152778.1 | NP_002603.1    | PDK4     | -             | Mitochondrion |
| 194040622 | 21.21 | 13 | 627  | 70.2  | 5.38 | 555.27 | XP_001929180.1 | NP_002661.2    | PLS1     | -             |               |
| 29027441  | 21.05 | 11 | 361  | 40.2  | 5.31 | 554.11 | AAO62090.1     |                |          |               |               |
| 194043917 | 13.94 | 12 | 531  | 58.1  | 5.80 | 554.01 | XP_001925672.1 | NP_000201.2    | ITGA6    | -             |               |
| 29027457  | 25.27 | 12 | 364  | 40.6  | 6.25 | 552.77 | AAO62098.1     |                |          |               |               |
| 194042794 | 19.09 | 8  | 351  | 40.0  | 8.65 | 547.48 | XP_001925861.1 | NP_612366.1    | CCDC109A | Yes (9+0)     |               |
| 148235351 | 29.32 | 13 | 249  | 27.4  | 8.00 | 539.09 | NP_001090944.1 | NP_066552.2    | NDUFV2   | -             | Mitochondrion |
| 194044001 | 44.67 | 14 | 244  | 27.3  | 9.32 | 537.80 | XP_001924675.1 | NP_055177.2    | HIBCH    | Yes (9+0)     | Mitochondrion |
| 33468754  | 50.55 | 13 | 182  | 20.6  | 4.94 | 537.16 | BAC81558.1     |                |          |               |               |
| 18652142  | 23.55 | 13 | 361  | 40.1  | 5.48 | 536.19 | AAL76974.1     |                |          |               |               |
| 194045104 | 1.90  | 10 | 1839 | 205.2 | 6.09 | 535.46 | XP_001926529.1 | NP_113584.3    | HUWE1    | Yes (9+2/9+0) |               |
| 194044901 | 13.63 | 10 | 587  | 65.9  | 5.30 | 533.41 | XP_001925971.1 | NP_005023.2    | PLS3     | Yes (9+0)     |               |
| 167001855 | 19.69 | 12 | 259  | 29.5  | 9.39 | 530.30 | NP_001095290.1 | NP_003850.1    | DPM1     | Yes (9+0)     |               |
| 194042814 | 9.68  | 12 | 1095 | 118.2 | 7.09 | 530.27 | XP_001928228.1 | NP_004913.2    | SEC24C   | Yes (9+2/9+0) |               |
| 83415443  | 20.50 | 12 | 361  | 40.0  | 5.29 | 528.84 | ABC17929.1     |                |          |               |               |
| 227430407 | 11.86 | 10 | 489  | 54.4  | 5.82 | 528.79 | NP_001153087.1 | NP_002264.1    | KRT8     | -             |               |
| 194043572 | 7.93  | 12 | 1576 | 175.6 | 5.34 | 527.30 | XP_001927025.1 | NP_005886.2    | GOLGA3   | Yes (9+2/9+0) |               |
| 194034542 | 4.43  | 12 | 1670 | 186.0 | 6.67 | 524.92 | XP_001925806.1 | NP_003248.3    | TJP1     | Yes (9+0)     |               |
| 2036      | 30.92 | 13 | 249  | 27.7  | 9.14 | 523.84 | CAA34633.1     | NP_002622.2    | PGD      | Yes (9+0)     |               |
| 94981331  | 7.49  | 12 | 601  | 67.9  | 9.10 | 522.22 | ABF49559.1     | YP_003024036.1 | MT-ND5   | -             | Mitochondrion |
| 219521966 | 21.38 | 14 | 421  | 46.9  | 8.53 | 519.76 | NP_001137171.1 | NP_060708.1    | AGK      | Yes (9+0)     | Mitochondrion |
| 112980823 | 29.55 | 11 | 176  | 20.0  | 4.61 | 518.67 | ABI29193.1     | NP_003397.1    | YWHAZ    | Yes (9+2/9+0) |               |
| 18699305  | 23.71 | 11 | 350  | 39.3  | 6.37 | 517.15 | AAL78519.1     |                |          |               |               |
| 31074212  | 10.91 | 8  | 605  | 68.3  | 9.04 | 515.54 | AAAP37947.1    | NP_004740.2    | TBRG4    | -             |               |
| 29027439  | 23.82 | 11 | 361  | 40.2  | 6.65 | 515.47 | AAO62089.1     |                |          |               |               |
| 194034394 | 12.11 | 11 | 801  | 90.8  | 5.20 | 512.50 | XP_001926660.1 | NP_005921.2    | CTAGE5   | Yes (9+0)     |               |
| 194041212 | 11.90 | 10 | 504  | 55.4  | 6.67 | 511.57 | XP_001928031.1 | NP_006832.1    | SLC38A3  | -             |               |
| 194036047 | 27.20 | 14 | 397  | 45.5  | 9.14 | 510.59 | XP_001928886.1 | NP_004623.1    | DAP3     | Yes (Global)  | Mitochondrion |
| 194042990 | 10.62 | 12 | 1300 | 140.6 | 6.32 | 510.21 | XP_001924891.1 | NP_000611.1    | NOS1     | Yes (Global)  |               |
| 194040423 | 28.49 | 11 | 372  | 39.9  | 9.48 | 510.11 | XP_001929615.1 | NP_055156.1    | MTCH1    | -             | Mitochondrion |
| 44890896  | 66.67 | 12 | 66   | 7.6   | 5.10 | 509.84 | BAD12120.1     | NP_001123910.1 | SPTAN1   | -             |               |
| 194036886 | 16.21 | 9  | 506  | 53.7  | 8.21 | 509.17 | XP_001927869.1 | NP_000300.1    | PPOX     | -             | Mitochondrion |
| 162138236 | 5.38  | 10 | 1265 | 140.1 | 7.40 | 506.11 | ABX82822.1     | NP_006286.1    | VARS     | Yes (9+0)     |               |
| 194037910 | 20.13 | 13 | 313  | 34.4  | 6.52 | 505.44 | XP_001924223.1 | NP_001834.2    | CNTN1    | Yes (9+0)     |               |
| 194038870 | 13.28 | 10 | 640  | 70.6  | 8.06 | 505.12 | XP_001928503.1 | NP_004554.2    | PCK2     | -             | Mitochondrion |
| 178056464 | 11.15 | 9  | 529  | 60.6  | 6.11 | 505.06 | NP_001116693.1 | NP_000511.2    | HEXA     | Yes (9+0)     |               |
| 194041508 | 12.02 | 11 | 757  | 84.1  | 5.14 | 502.69 | XP_001924735.1 | NP_006149.2    | NEFL     | Yes (9+0)     |               |
| 194038813 | 19.54 | 12 | 563  | 63.2  | 5.94 | 501.13 | XP_001924849.1 | NP_057190.2    | SCFD1    | Yes (9+0)     |               |
| 167908793 | 7.43  | 9  | 1184 | 132.2 | 6.93 | 501.09 | NP_001108142.1 | NP_003322.3    | TYK2     | -             |               |
| 51507647  | 24.75 | 11 | 295  | 33.6  | 6.10 | 499.78 | CAE46349.1     |                |          |               |               |

|           |       |    |      |       |       |        |                |                |          |               |               |
|-----------|-------|----|------|-------|-------|--------|----------------|----------------|----------|---------------|---------------|
| 47523232  | 11.49 | 11 | 940  | 107.5 | 6.81  | 498.80 | NP_998969.1    | NP_055129.2    | DDX58    | -             |               |
| 164664454 | 27.66 | 14 | 394  | 43.3  | 8.90  | 497.20 | NP_001106914.1 | NP_006108.2    | PECI     | Yes (9+0)     |               |
| 194037636 | 33.49 | 13 | 209  | 23.3  | 5.34  | 496.16 | XP_001927984.1 | NP_036322.2    | ALDH1L1  | -             |               |
| 194033945 | 15.93 | 10 | 408  | 45.4  | 5.16  | 495.92 | XP_001925536.1 | NP_005038.1    | PSMD5    | Yes (9+0)     |               |
| 194041047 | 26.34 | 10 | 243  | 27.4  | 7.90  | 495.10 | NP_001926114.1 | NP_004042.1    | BDH1     | -             | Mitochondrion |
| 194042264 | 43.66 | 14 | 71   | 8.0   | 9.58  | 494.10 | XP_001924961.1 | NP_005262.1    | GLUD1    | -             | Mitochondrion |
| 194042691 | 1.75  | 11 | 4346 | 474.5 | 6.32  | 493.34 | XP_001929357.1 | NP_066267.2    | ANK3     | Yes (9+2/9+0) |               |
| 47522708  | 1.27  | 8  | 864  | 99.0  | 5.35  | 492.02 | NP_999054.1    | NP_005410.1    | STAT2    | -             |               |
| 194040694 | 11.16 | 9  | 251  | 27.4  | 9.91  | 490.95 | XP_001927364.1 | NP_000273.2    | PCCA     | Yes (9+0)     | Mitochondrion |
| 194018686 | 26.13 | 12 | 199  | 22.4  | 9.31  | 488.98 | NP_001123435.1 | NP_065393.1    | RTN4     | Yes (9+0)     |               |
| 194035905 | 4.11  | 10 | 2411 | 280.1 | 4.98  | 488.97 | XP_001929304.1 | NP_003117.2    | SPTA1    | Yes (9+0)     | Serum         |
| 47523446  | 12.37 | 10 | 1091 | 123.1 | 5.27  | 488.68 | NP_999348.1    | NP_000713.2    | CACNA2D1 | Yes (9+0)     |               |
| 47523744  | 14.18 | 10 | 529  | 58.2  | 6.49  | 488.60 | NP_999507.1    | NP_005100.1    | OXSRI    | -             |               |
| 194034149 | 35.32 | 9  | 218  | 25.2  | 6.40  | 487.99 | XP_001924714.1 | NP_057366.2    | AK3      | Yes (9+2/9+0) | Mitochondrion |
| 89886177  | 33.75 | 14 | 317  | 35.7  | 6.35  | 481.86 | NP_001034839.1 | NP_002446.2    | MTX1     | Yes (9+0)     | Mitochondrion |
| 20378702  | 21.70 | 10 | 364  | 40.5  | 5.92  | 481.25 | AAM20945.1     |                |          |               |               |
| 147225187 | 14.60 | 13 | 726  | 80.2  | 6.06  | 478.15 | CAN13319.1     | NP_000535.3    | TAP2     | Yes (9+0)     |               |
| 23598133  | 21.17 | 10 | 359  | 39.8  | 5.27  | 477.89 | AAN35110.1     |                |          |               |               |
| 194045128 | 10.76 | 12 | 539  | 61.7  | 7.03  | 477.70 | XP_001927166.1 | NP_060181.2    | GDPD2    | Yes (Global)  |               |
| 211578396 | 22.98 | 8  | 457  | 50.4  | 8.32  | 475.16 | NP_001129982.1 | NP_066923.3    | NFS1     | -             | Mitochondrion |
| 29027459  | 20.88 | 10 | 364  | 40.5  | 6.13  | 472.44 | AAO62099.1     |                |          |               |               |
| 178056623 | 27.98 | 11 | 243  | 27.0  | 7.30  | 472.27 | NP_001116685.1 | NP_004729.1    | VAPB     | Yes (9+0)     |               |
| 194036227 | 23.73 | 10 | 472  | 52.5  | 6.64  | 470.44 | XP_001929678   | NP_003935.2    | SELENBP1 | Yes (9+0)     |               |
| 90569225  | 37.37 | 10 | 99   | 11.6  | 4.73  | 469.64 | ABD94501.1     | NP_001123910.1 | SPTAN1   | -             |               |
| 45359363  | 33.33 | 12 | 144  | 15.6  | 8.19  | 468.76 | AAS59066.1     | NP_056195.3    | SAMM50   | Yes (9+0)     | Mitochondrion |
| 62867359  | 29.41 | 8  | 170  | 19.3  | 5.25  | 468.32 | BAD95982.1     |                |          |               |               |
| 178056852 | 14.62 | 12 | 807  | 91.6  | 7.15  | 465.77 | NP_001116541.1 | NP_001081.1    | ABCF1    | Yes (9+2/9+0) |               |
| 6606313   | 54.17 | 12 | 96   | 11.6  | 8.46  | 465.04 | AAF19166.1     | NP_001226.2    | SERPINH1 | Yes (9+2/9+0) | Serum         |
| 116047849 | 37.57 | 11 | 189  | 22.4  | 5.72  | 462.99 | ABJ53147.1     | NP_000841.1    | GSTM4    | -             |               |
| 18652158  | 16.94 | 10 | 360  | 39.9  | 5.92  | 461.92 | AAL76982.1     |                |          |               |               |
| 194038528 | 16.39 | 9  | 421  | 46.5  | 6.98  | 459.12 | XP_001929053.1 | NP_006812.3    | ACOT2    | -             | Mitochondrion |
| 41176612  | 45.74 | 10 | 94   | 10.5  | 4.67  | 453.11 | AAR99598.1     | NP_068656.2    | FGG      | -             | Serum         |
| 194036104 | 12.45 | 7  | 490  | 54.4  | 6.21  | 451.36 | XP_001929411.1 | NP_079483.3    | FLAD1    | Yes (9+0)     |               |
| 56606869  | 77.45 | 11 | 102  | 11.3  | 4.46  | 450.31 | AAW02819.1     | NP_004915.2    | ACTN4    | Yes (9+2/9+0) |               |
| 194045027 | 27.61 | 9  | 268  | 29.4  | 9.69  | 449.70 | XP_001926000.1 | NP_940852.3    | APOOL    | Yes (9+0)     |               |
| 157427709 | 7.12  | 8  | 1026 | 117.3 | 5.62  | 447.22 | NP_001098761.1 | NP_005566.2    | LNPEP    | -             |               |
| 194038437 | 13.28 | 9  | 580  | 65.9  | 6.11  | 447.10 | XP_001925608.1 | NP_071919.2    | MPP5     | Yes (9+2/9+0) |               |
| 194037945 | 26.12 | 10 | 268  | 29.8  | 7.64  | 446.77 | XP_001924443.1 | NP_004323.2    | BPHL     | Yes (9+0)     |               |
| 23598145  | 21.98 | 11 | 364  | 40.6  | 5.76  | 446.24 | AAN35116.1     |                |          |               |               |
| 194036926 | 14.66 | 11 | 839  | 93.9  | 5.21  | 444.12 | XP_001925499.1 | NP_060472.2    | OXR1     | Yes (9+0)     | Mitochondrion |
| 194036421 | 11.27 | 7  | 772  | 86.3  | 5.38  | 442.04 | XP_001924396.1 | NP_001007554.1 | CSDE1    | -             |               |
| 194039309 | 6.76  | 9  | 1717 | 192.4 | 6.06  | 441.09 | XP_001929249.1 | NP_055595.2    | CUL7     | -             |               |
| 29027437  | 23.55 | 10 | 361  | 40.1  | 5.88  | 440.69 | AAO62088.1     |                |          |               |               |
| 15082142  | 40.74 | 8  | 108  | 11.7  | 7.34  | 438.82 | AAK84036.1     | NP_000627.2    | SOD2     | -             | Mitochondrion |
| 194041384 | 9.48  | 9  | 1034 | 117.0 | 8.68  | 436.52 | XP_001925087.1 | NP_212132.2    | DOCK7    | Yes (9+0)     |               |
| 194036512 | 11.26 | 11 | 613  | 67.5  | 8.43  | 434.60 | XP_001927385.1 | NP_006612.2    | AHCYL1   | Yes (9+2/9+0) |               |
| 113205612 | 27.72 | 11 | 267  | 30.1  | 6.00  | 432.62 | NP_001038006.1 | NP_006545.1    | MTX2     | Yes (9+0)     | Mitochondrion |
| 194038751 | 30.11 | 10 | 269  | 30.1  | 9.66  | 432.15 | XP_001924288.1 | NP_085134.1    | SLC25A21 | -             | Mitochondrion |
| 219521982 | 24.19 | 8  | 339  | 37.8  | 5.49  | 431.32 | NP_001137178.1 | NP_009106.1    | ERLIN2   | Yes (9+0)     |               |
| 194037239 | 27.27 | 8  | 297  | 33.4  | 7.21  | 429.86 | XP_001926338.1 | NP_003303.2    | TST      | -             | Mitochondrion |
| 178056175 | 24.91 | 7  | 269  | 29.4  | 6.05  | 424.53 | NP_001116558.1 | NP_940991.1    | BSG      | Yes (9+0)     |               |
| 194043190 | 35.92 | 11 | 284  | 33.1  | 9.23  | 424.08 | XP_001928943.1 | NP_003625.2    | NIPSNAP1 | Yes (9+0)     |               |
| 47523704  | 8.01  | 7  | 537  | 60.8  | 8.68  | 421.08 | NP_999484.1    | NP_002750.1    | EIF2AK2  | -             |               |
| 5835868   | 6.19  | 1  | 226  | 25.0  | 9.99  | 419.21 | NP_008639.1    | YP_003024031.1 | MT-ATP6  | -             | Mitochondrion |
| 194034883 | 7.50  | 12 | 973  | 110.1 | 6.01  | 418.16 | XP_001929396.1 | NP_065908.1    | VPS18    | Yes (9+0)     |               |
| 148231223 | 14.12 | 10 | 524  | 55.1  | 5.66  | 417.36 | NP_001090898.1 | NP_065797.2    | MAVS     | -             |               |
| 201066356 | 2.23  | 9  | 986  | 109.9 | 6.81  | 414.96 | NP_001128439.1 | NP_004429.1    | EPHA4    | Yes (9+0)     |               |
| 194043535 | 27.00 | 6  | 237  | 25.1  | 9.10  | 411.94 | XP_001927120.1 | NP_116172.2    | CBR4     | -             |               |
| 194038210 | 14.36 | 9  | 599  | 66.8  | 6.32  | 411.51 | XP_001924682.1 | NP_005056.3    | SEL1L    | -             |               |
| 194044288 | 7.09  | 9  | 846  | 87.4  | 10.08 | 411.06 | XP_001926148.1 | NP_001036041.1 | RRBP1    | Yes (9+2/9+0) |               |
| 138753471 | 51.55 | 10 | 161  | 18.1  | 4.50  | 410.68 | CAM59483.1     | NP_006817.1    | YWHAQ    | Yes (9+2/9+0) |               |
| 33468744  | 37.57 | 9  | 181  | 20.7  | 5.25  | 409.24 | BAC81553.1     |                |          |               |               |
| 156601158 | 14.43 | 11 | 769  | 84.6  | 6.74  | 408.53 | ABU86738.1     | NP_000202.2    | ITGB2    | -             | Serum         |
| 161511655 | 21.32 | 7  | 272  | 28.7  | 8.87  | 403.72 | ABX71843.1     |                |          |               |               |
| 194033435 | 4.46  | 9  | 381  | 41.9  | 8.75  | 403.55 | XP_001926443.1 | NP_149972.1    | LDHAL6B  | -             |               |
| 194042764 | 7.39  | 6  | 568  | 63.6  | 9.25  | 403.43 | XP_001928175.1 | NP_003892.2    | SGLP1    | -             |               |
| 51507653  | 21.02 | 9  | 295  | 33.5  | 5.31  | 398.86 | CAE46352.1     |                |          |               |               |
| 194038857 | 6.80  | 7  | 1000 | 109.0 | 4.94  | 396.53 | XP_001925868.1 | NP_078934.3    | IPO4     | -             |               |
| 194038633 | 7.28  | 7  | 1017 | 113.3 | 6.44  | 396.03 | XP_001924247.1 | NP_006706.2    | MAN2C1   | Yes (Global)  |               |
| 194043043 | 19.16 | 8  | 261  | 29.2  | 7.36  | 391.31 | XP_001926931.1 | NP_006808.1    | ERP29    | Yes (9+0)     |               |
| 61097883  | 3.27  | 5  | 887  | 101.2 | 7.01  | 390.67 | NP_001012974.1 | NP_002638.2    | PIK3C3   | Yes (9+0)     |               |
| 44885994  | 6.95  | 9  | 662  | 75.5  | 5.69  | 390.59 | BAD11809.1     | NP_002453.2    | MX1      | -             |               |
| 194043083 | 33.22 | 8  | 289  | 32.2  | 5.43  | 390.53 | XP_001928729.1 | NP_055545.1    | MLEC     | -             |               |
| 148747594 | 29.25 | 12 | 318  | 34.3  | 5.97  | 386.13 | NP_001092068.1 | NP_000993.1    | RPLP0    | -             | Ribosome      |
| 178056558 | 16.28 | 9  | 215  | 23.7  | 8.06  | 385.08 | NP_001116652.1 | NP_004153.2    | RAB5A    | Yes (9+2/9+0) |               |
| 277349569 | 15.59 | 8  | 513  | 55.4  | 8.24  | 384.32 | NP_001162173.1 | NP_006431.2    | TXNRD2   | -             | Mitochondrion |
| 47522828  | 3.65  | 11 | 768  | 86.1  | 6.30  | 382.61 | NP_999166.1    | NP_003225.2    | TFRC     | -             |               |
| 47523870  | 39.29 | 8  | 224  | 25.0  | 6.01  | 382.47 | NP_999573.1    | NP_004896.1    | PRDX6    | Yes (9+2/9+0) |               |
| 194044373 | 15.68 | 5  | 389  | 43.3  | 6.81  | 381.81 | XP_001927122.1 | NP_065392.1    | C20orf3  | -             |               |
| 111038267 | 17.11 | 6  | 450  | 50.0  | 6.39  | 380.96 | ABH03530.1     | NP_002204.2    | ITGB5    | -             |               |
| 168828757 | 14.40 | 8  | 361  | 40.0  | 6.19  | 379.20 | ACA33865.1     |                |          |               |               |
| 148747342 | 5.32  | 6  | 1090 | 120.6 | 5.97  | 375.18 | NP_001092055.1 | NP_003655.3    | AP3B1    | Yes (9+0)     |               |
| 164507    | 17.13 | 7  | 467  | 51.1  | 7.09  | 374.11 | AAA51295.1     |                |          |               | Serum         |
| 47523192  | 12.24 | 6  | 474  | 52.2  | 7.21  | 373.00 | NP_998993.1    |                |          |               | Serum         |
| 194035688 | 13.45 | 8  | 617  | 68.1  | 8.28  | 372.57 | XP_001924875.1 | NP_001909.2    | DBT      | Yes (9+2)     | Mitochondrion |

|           |       |    |      |       |       |        |                |                |           |               |               |
|-----------|-------|----|------|-------|-------|--------|----------------|----------------|-----------|---------------|---------------|
| 194037951 | 14.55 | 9  | 378  | 42.5  | 6.57  | 372.53 | XP_001926779.1 | NP_109591.1    | SERPINB1  | Yes (9+2/9+0) | Serum         |
| 56606867  | 47.89 | 7  | 71   | 8.3   | 5.33  | 370.60 | AAW02818.1     | NP_001123477.1 | ACTN1     | Yes (9+2/9+0) |               |
| 194040817 | 3.76  | 10 | 2290 | 267.0 | 5.30  | 368.46 | XP_001925616.1 | NP_002069.2    | GOLGA4    | Yes (9+2/9+0) |               |
| 194043483 | 39.63 | 9  | 270  | 30.0  | 5.63  | 365.32 | XP_001929673.1 | NP_000745.1    | COMT      | Yes (9+0)     |               |
| 194038248 | 11.49 | 7  | 653  | 72.7  | 7.12  | 365.32 | XP_001925968.1 | NP_001010854.1 | TTC7B     | Yes (9+0)     |               |
| 156120140 | 6.50  | 6  | 1246 | 137.5 | 6.21  | 364.72 | NP_001095287.1 | NP_008860.4    | SKIV2L    | Yes (9+0)     |               |
| 47523266  | 8.72  | 9  | 562  | 61.7  | 7.09  | 364.47 | NP_998954.1    | NP_079509.5    | COASY     | Yes (9+0)     |               |
| 194035589 | 9.50  | 7  | 853  | 98.8  | 8.56  | 363.41 | XP_001924990.1 | NP_055661.3    | KIAA0196  | Yes (9+0)     |               |
| 194033889 | 16.27 | 7  | 381  | 41.5  | 8.10  | 362.74 | XP_001925382.1 | NP_115679.2    | HSDL2     | -             |               |
| 194036638 | 15.97 | 6  | 288  | 32.7  | 6.99  | 362.26 | XP_001924756.1 | NP_057111.1    | LACTB2    | -             |               |
| 194039712 | 9.75  | 2  | 277  | 31.7  | 8.02  | 362.00 | XP_001927184.1 | NP_002824.1    | PTPN9     | -             |               |
| 194040681 | 7.65  | 5  | 353  | 41.5  | 9.60  | 361.08 | XP_001925853.1 | NP_064506.3    | UGGT2     | -             |               |
| 47523746  | 32.51 | 7  | 243  | 25.7  | 7.83  | 360.98 | NP_999508.1    | NP_000311.2    | QDPR      | Yes (9+0)     |               |
| 194043067 | 37.00 | 9  | 327  | 37.5  | 7.94  | 360.79 | XP_001928267.1 | NP_115690.3    | COQ5      | -             | Mitochondrion |
| 297307135 | 7.52  | 9  | 944  | 103.1 | 6.28  | 359.74 | NP_001171998   | NP_061141.2    | UNC45A    | -             |               |
| 47522844  | 4.21  | 8  | 1661 | 186.7 | 6.51  | 358.09 | NP_999174.1    | NP_000055.2    | C3        | -             | Serum         |
| 47522860  | 24.62 | 8  | 260  | 27.8  | 8.68  | 357.20 | NP_999184.1    | NP_066284.2    | DHRS4     | Yes (9+0)     |               |
| 62082662  | 7.59  | 8  | 435  | 49.6  | 6.35  | 355.74 | AAX62160.1     | NP_002094.2    | GYS1      | -             |               |
| 194037681 | 3.55  | 5  | 1410 | 161.7 | 5.66  | 355.19 | XP_001926390.1 | NP_003557.2    | EEA1      | Yes (9+2/9+0) |               |
| 194041147 | 6.48  | 12 | 1065 | 121.8 | 6.11  | 353.09 | XP_001925272.1 | NP_000087.1    | CP        | -             | Serum         |
| 194038973 | 25.35 | 9  | 288  | 32.0  | 7.18  | 353.07 | XP_001929258.1 | NP_000261.2    | PNP       | -             |               |
| 194040608 | 20.77 | 7  | 337  | 39.2  | 8.38  | 352.60 | XP_001928815.1 | NP_001073138.1 | CAB39L    | -             |               |
| 56417363  | 15.44 | 8  | 395  | 42.7  | 7.65  | 350.41 | AAV90625.1     | NP_001900.1    | CTSD      | -             |               |
| 219522024 | 5.29  | 5  | 416  | 46.5  | 5.29  | 350.00 | NP_001137199.1 | NP_057626.2    | MST4      | -             |               |
| 194036773 | 10.34 | 8  | 793  | 91.3  | 5.11  | 349.17 | XP_001927795.1 | NP_055785.2    | KIFAP3    | Yes (9+2/9+0) |               |
| 194044039 | 24.49 | 7  | 147  | 16.9  | 6.51  | 348.93 | XP_001926810.1 | NP_005268.1    | GPM6A     | Yes (9+0)     |               |
| 196122275 | 9.32  | 9  | 1041 | 115.2 | 5.74  | 348.04 | ACG69792.1     | NP_002201.1    | ITGAV     | Yes (9+0)     |               |
| 33468740  | 16.57 | 6  | 169  | 19.3  | 5.07  | 346.76 | BAC81551.1     |                |           |               |               |
| 194041008 | 13.13 | 6  | 358  | 40.5  | 6.32  | 346.04 | XP_001926476.1 | NP_057390.1    | DNAJB11   | Yes (9+2/9+0) |               |
| 146741286 | 5.65  | 7  | 1204 | 132.7 | 7.05  | 344.29 | BAF62298.1     | NP_005219.2    | EGFR      | -             |               |
| 194045003 | 2.89  | 3  | 1039 | 116.1 | 6.02  | 342.84 | XP_001926323.1 | NP_002628.2    | PHKA1     | -             |               |
| 194033668 | 14.86 | 9  | 592  | 66.7  | 6.13  | 341.99 | XP_001925593.1 | NP_004477.3    | GOLGA2    | Yes (9+2/9+0) |               |
| 194043603 | 36.44 | 10 | 247  | 28.5  | 5.21  | 341.09 | XP_001924932.1 | NP_919337.1    | STX2      | -             |               |
| 5835872   | 7.84  | 8  | 459  | 51.8  | 9.54  | 340.42 | NP_008643.1    | YP_003024035.1 | ND4       | -             | Mitochondrion |
| 270289750 | 12.20 | 8  | 541  | 58.5  | 7.42  | 338.81 | NP_001161887.1 | NP_002970.2    | SCP2      | -             | Mitochondrion |
| 281324303 | 19.14 | 7  | 350  | 38.8  | 5.20  | 338.55 | ADA60693.1     |                |           |               |               |
| 47522702  | 16.31 | 7  | 325  | 36.5  | 6.99  | 337.23 | NP_999055.1    | NP_006057.1    | AKR1A1    | Yes (9+0)     |               |
| 194044779 | 8.11  | 7  | 518  | 59.7  | 6.05  | 337.11 | XP_001928144.1 | NP_689794.1    | MOSPD2    | -             |               |
| 62529273  | 9.12  | 6  | 691  | 74.6  | 5.15  | 336.96 | AAX84942.1     | NP_001741.4    | CAST      | -             |               |
| 285818414 | 24.78 | 7  | 456  | 51.3  | 5.44  | 336.33 | ADC38880.1     | NP_002005.1    | FKBP4     | Yes (9+2/9+0) |               |
| 194043676 | 6.60  | 5  | 500  | 57.6  | 8.46  | 334.96 | XP_001924701.1 | NP_079415.3    | ARMC9     | -             |               |
| 194034195 | 20.41 | 6  | 338  | 38.1  | 7.80  | 334.58 | XP_001925715.1 | NP_000691.1    | ANXA1     | Yes (9+2/9+0) |               |
| 194033835 | 26.32 | 8  | 247  | 28.5  | 9.31  | 333.29 | XP_001925026.1 | NP_056284.1    | NIPSNAP3A | Yes (9+0)     |               |
| 194035833 | 8.74  | 9  | 709  | 78.6  | 6.09  | 331.52 | XP_001928821.1 | NP_056146.1    | NCSTN     | -             |               |
| 194042282 | 10.39 | 9  | 356  | 38.3  | 10.26 | 329.19 | XP_001925311.1 | NP_005262.1    | GLUD1     | -             | Mitochondrion |
| 197251936 | 20.27 | 8  | 370  | 41.6  | 8.18  | 328.60 | NP_001127827.1 | NP_006400.2    | ARPC1A    | Yes (9+0)     |               |
| 51493747  | 14.11 | 5  | 326  | 35.6  | 8.82  | 325.84 | AAU04861.1     | NP_001957.2    | EHHADH    | -             |               |
| 194036667 | 6.94  | 6  | 591  | 65.3  | 8.51  | 325.61 | XP_001926336.1 | NP_037389.4    | SGK3      | -             |               |
| 47523060  | 9.78  | 6  | 511  | 57.6  | 6.27  | 324.34 | NP_999293.1    | NP_005596.2    | PPP3CA    | Yes (9+2/9+0) |               |
| 47523430  | 2.63  | 7  | 1367 | 154.9 | 5.86  | 323.59 | NP_999337.1    | NP_000866.1    | IGF1R     | -             |               |
| 194043996 | 8.94  | 6  | 414  | 45.1  | 8.78  | 322.77 | XP_001925935.1 | NP_071748.2    | OSGEPL1   | -             |               |
| 194041049 | 13.50 | 7  | 637  | 69.6  | 5.90  | 321.82 | XP_001926202.1 | NP_004078.2    | DLG1      | Yes (9+2/9+0) |               |
| 213021239 | 10.67 | 7  | 506  | 55.1  | 6.55  | 321.09 | NP_001132942.1 | NP_067017.2    | SLC30A1   | -             |               |
| 45268993  | 26.97 | 7  | 304  | 33.9  | 7.06  | 321.04 | AAS55909.1     | NP_006301.3    | NPEPPS    | Yes (9+0)     |               |
| 194044826 | 14.22 | 7  | 415  | 47.9  | 8.82  | 320.96 | XP_001927474.1 | NP_001135858.1 | PDK3      | Yes (9+0)     | Mitochondrion |
| 194038457 | 27.53 | 7  | 316  | 34.9  | 9.07  | 317.72 | XP_001928802.1 | NP_057110.3    | RDH11     | Yes (9+0)     |               |
| 509403    | 10.77 | 8  | 427  | 48.7  | 5.58  | 317.12 | CAA84355.1     | NP_005795.2    | DDX39     | -             |               |
| 16506695  | 3.17  | 9  | 2300 | 252.4 | 6.14  | 315.60 | AAL23907.1     | NP_000867.2    | IGF2R     | -             |               |
| 48675951  | 7.93  | 8  | 555  | 62.7  | 6.49  | 314.87 | NP_001001641.1 | NP_001970.2    | EPHX2     | -             |               |
| 262204898 | 7.75  | 6  | 581  | 65.9  | 6.29  | 314.80 | BAI48029.1     | NP_000886.1    | LTA4H     | Yes (9+0)     |               |
| 47523714  | 9.68  | 7  | 620  | 67.6  | 6.49  | 314.11 | NP_999490.1    | NP_620124.1    | RHOT2     | Yes (9+0)     | Mitochondrion |
| 194041915 | 3.01  | 6  | 1861 | 206.5 | 5.80  | 313.34 | XP_001928428.1 | NP_004184.1    | GBF1      | Yes (9+0)     |               |
| 7108677   | 32.26 | 7  | 124  | 14.2  | 4.94  | 312.17 | AAF36511.1     | NP_003325.2    | UBA1      | -             |               |
| 194044822 | 18.75 | 4  | 272  | 30.5  | 6.44  | 312.10 | XP_001927404.1 | NP_006397.1    | PRDX4     | Yes (9+2/9+0) |               |
| 194041043 | 19.25 | 7  | 187  | 20.6  | 10.59 | 311.32 | XP_001926007.1 | NP_976060.1    | BDH1      | -             | Mitochondrion |
| 262204920 | 23.93 | 7  | 280  | 29.8  | 6.52  | 310.87 | BAI48040.1     | NP_060911.2    | PECR      | -             |               |
| 6007614   | 4.50  | 6  | 622  | 68.7  | 8.62  | 310.62 | AAF00977.1     | NP_003031.3    | SLC4A2    | -             |               |
| 117606675 | 7.08  | 5  | 226  | 25.0  | 8.88  | 310.31 | ABK41958.1     | NP_003042.3    | SLC16A1   | Yes (9+0)     |               |
| 119663043 | 34.17 | 5  | 120  | 13.0  | 7.08  | 310.18 | CAJ54466.1     |                |           | -             | Serum         |
| 194038349 | 9.12  | 2  | 351  | 38.2  | 6.46  | 309.83 | XP_001926466   | NP_001076.2    | SERPINA3  | -             | Serum         |
| 194033453 | 9.93  | 5  | 443  | 50.4  | 8.12  | 308.72 | XP_001929253.1 | NP_060379.2    | RMND1     | Yes (Global)  |               |
| 194042948 | 18.38 | 7  | 272  | 31.8  | 7.28  | 305.51 | XP_001929498.1 | NP_001035196.1 | HVCN1     | -             |               |
| 194037091 | 7.69  | 8  | 533  | 59.6  | 5.83  | 304.72 | XP_001927203.1 | NP_003900.1    | CPNE3     | -             |               |
| 194037904 | 21.43 | 7  | 224  | 25.4  | 8.75  | 304.20 | XP_001927215.1 | NP_001687.1    | ATP6V1E1  | Yes (9+2/9+0) |               |
| 194040683 | 8.79  | 6  | 762  | 87.3  | 5.49  | 303.14 | XP_001925875.1 | NP_064506.3    | UGGT2     | -             |               |
| 194038408 | 33.49 | 6  | 209  | 22.9  | 5.59  | 300.66 | XP_001924364.1 | NP_056255.2    | MTHFD1L   | -             | Mitochondrion |
| 194035680 | 2.67  | 9  | 487  | 56.6  | 6.60  | 300.51 | XP_001925424.1 | NP_001559.1    | EIF3E     | Yes (9+0)     |               |
| 194038347 | 5.91  | 2  | 423  | 46.6  | 6.21  | 300.11 | XP_001928637.1 | NP_001076.2    | SERPINA3  | -             | Serum         |
| 194033616 | 6.89  | 6  | 842  | 91.8  | 6.52  | 300.05 | XP_001924749.1 | NP_073744.2    | FAM129B   | -             |               |
| 194033565 | 7.40  | 6  | 838  | 95.2  | 5.17  | 299.77 | XP_001927144.1 | NP_036329.3    | RABGAP1   | -             |               |
| 194037798 | 10.14 | 9  | 483  | 53.0  | 5.83  | 298.64 | XP_001925480.1 | NP_055617.1    | KIAA0528  | Yes (9+0)     |               |
| 160333742 | 7.92  | 8  | 240  | 26.4  | 4.55  | 297.80 | NP_001103895.1 | NP_055695.2    | CD302     | -             |               |
| 194041767 | 5.00  | 9  | 580  | 63.3  | 7.83  | 297.65 | XP_001927663.1 | NP_056446.4    | TCTN3     | Yes (9+0)     |               |
| 21914408  | 11.50 | 7  | 226  | 25.1  | 7.52  | 297.18 | AAM81376.1     | NP_001760.1    | CD9       | -             |               |
| 285818454 | 7.09  | 7  | 875  | 98.5  | 6.71  | 296.80 | ADC38900.1     | NP_061878.3    | MIOS      | -             |               |

|           |       |   |      |       |       |        |                |                |          |               |  |               |  |
|-----------|-------|---|------|-------|-------|--------|----------------|----------------|----------|---------------|--|---------------|--|
| 112292697 | 14.96 | 8 | 361  | 40.3  | 6.37  | 296.08 | ABI14828.1     |                |          |               |  |               |  |
| 150251019 | 22.87 | 4 | 223  | 25.3  | 8.40  | 293.71 | ABR67998.1     | NP_037542.1    | AK4      | -             |  | Mitochondrion |  |
| 210062464 | 20.06 | 5 | 314  | 34.3  | 6.62  | 293.21 | ABY85807.2     |                |          |               |  | Serum         |  |
| 194034135 | 5.19  | 4 | 905  | 100.2 | 7.34  | 293.02 | XP_001924252.1 | NP_079172.2    | ERMP1    | Yes (Global)  |  |               |  |
| 194038835 | 24.49 | 7 | 294  | 31.2  | 9.01  | 292.75 | XP_001926763.1 | NP_064580.2    | SDR39U1  | -             |  |               |  |
| 194038897 | 5.51  | 5 | 363  | 40.7  | 8.13  | 289.66 | XP_001924450.1 | NP_036376.2    | SLC7A8   | -             |  |               |  |
| 47522786  | 12.60 | 6 | 508  | 56.9  | 7.88  | 286.80 | NP_999145.1    | NP_006750.3    | UGP2     | Yes (9+0)     |  |               |  |
| 194038584 | 7.11  | 7 | 985  | 107.4 | 5.92  | 286.53 | XP_001926782.1 | NP_149107.4    | NEK9     | -             |  |               |  |
| 47522960  | 9.34  | 6 | 289  | 31.7  | 7.69  | 286.28 | NP_999238.1    | NP_001748.1    | CBR1     | Yes (9+0)     |  |               |  |
| 194044583 | 10.73 | 6 | 662  | 72.9  | 8.31  | 286.14 | XP_001925939.1 | NP_065069.1    | RALGAPB  | -             |  |               |  |
| 194035955 | 1.97  | 6 | 1570 | 173.2 | 5.66  | 286.12 | XP_001927750.1 | NP_937879.1    | ARHGEF11 | Yes (9+0)     |  |               |  |
| 55742658  | 2.01  | 7 | 3139 | 344.6 | 6.39  | 286.01 | NP_999129.1    | NP_002102.4    | HDH      | -             |  |               |  |
| 148224365 | 21.69 | 5 | 272  | 30.6  | 6.01  | 283.88 | NP_001090922.1 | NP_004921.1    | CAPZB    | Yes (9+0)     |  |               |  |
| 1907268   | 34.07 | 8 | 226  | 25.5  | 7.75  | 278.87 | CAA62960.1     | NP_001096137.1 | PSMA4    | Yes (9+0)     |  |               |  |
| 194037792 | 12.93 | 4 | 348  | 39.1  | 5.25  | 278.48 | XP_001925124.1 | NP_005495.2    | BCAT1    | Yes (9+0)     |  |               |  |
| 168208446 | 14.96 | 8 | 361  | 40.6  | 5.99  | 278.30 | ACA21808.1     |                |          |               |  |               |  |
| 212549623 | 13.05 | 5 | 406  | 47.0  | 5.38  | 278.15 | NP_001131101.1 | NP_055866.1    | ERP44    | -             |  |               |  |
| 72535208  | 9.62  | 8 | 707  | 80.7  | 8.00  | 277.88 | NP_001026966.1 | NP_058197.2    | OAS2     | -             |  | Mitochondrion |  |
| 194041831 | 11.00 | 5 | 582  | 63.2  | 8.09  | 277.85 | XP_001929210.1 | NP_116098.2    | PYROXD2  | -             |  |               |  |
| 194042130 | 6.33  | 7 | 458  | 50.3  | 10.17 | 277.70 | XP_001927430.1 | NP_998814.1    | SFXN4    | -             |  | Mitochondrion |  |
| 80971504  | 14.92 | 5 | 295  | 32.9  | 4.87  | 277.61 | NP_001032223.1 | NP_001012321.1 | RPSA     | Yes (9+2)     |  | Ribosome      |  |
| 194038415 | 7.40  | 5 | 933  | 100.8 | 6.74  | 277.08 | XP_001924552.1 | NP_005947.3    | MTHFD1   | Yes (9+2/9+0) |  |               |  |
| 194035052 | 16.76 | 3 | 173  | 19.9  | 9.28  | 276.53 | XP_001929064.1 | NP_057614.1    | RAB8B    | Yes (9+2/9+0) |  |               |  |
| 37787313  | 16.25 | 5 | 480  | 51.5  | 6.09  | 275.98 | AAP69607.1     | NP_660202.3    | NAPRT1   | -             |  |               |  |
| 194038611 | 30.15 | 5 | 199  | 22.0  | 7.14  | 274.20 | XP_001926158.1 | NP_665877.1    | GSTZ1    | -             |  |               |  |
| 164023822 | 12.40 | 5 | 250  | 29.5  | 10.67 | 274.10 | NP_001106688.1 | NP_000962.2    | RPL7     | -             |  | Ribosome      |  |
| 194044571 | 8.12  | 4 | 542  | 60.1  | 7.42  | 273.25 | XP_001928649.1 | NP_005408.1    | SRC      | Yes (9+2/9+0) |  |               |  |
| 281324325 | 12.19 | 6 | 361  | 40.1  | 5.92  | 272.57 | ADA60704.1     |                |          |               |  |               |  |
| 194040771 | 7.40  | 5 | 919  | 100.5 | 6.70  | 272.43 | XP_001926328.1 | NP_001001486.1 | ATP2C1   | Yes (9+2/9+0) |  |               |  |
| 121483580 | 12.26 | 7 | 514  | 59.7  | 6.24  | 272.36 | ABM54178.1     | NP_001367.2    | DYNC1H1  | Yes (9+2/9+0) |  |               |  |
| 147903595 | 18.18 | 5 | 286  | 33.0  | 5.85  | 271.55 | NP_001090924.1 | NP_006126.1    | CAPZA1   | Yes (9+0)     |  |               |  |
| 194043375 | 15.49 | 5 | 284  | 33.3  | 6.65  | 271.03 | XP_001929544.1 | NP_002737.2    | MAPK3    | Yes (9+2/9+0) |  |               |  |
| 194040283 | 11.24 | 6 | 694  | 79.1  | 5.97  | 269.32 | XP_001925428.1 | NP_072047.4    | VPS52    | Yes (9+0)     |  |               |  |
| 153791794 | 1.52  | 5 | 2177 | 250.6 | 8.62  | 265.71 | NP_001093398.1 | NP_000251.3    | MYO7A    | Yes (9+2/9+0) |  |               |  |
| 194037982 | 15.66 | 4 | 249  | 27.4  | 6.23  | 265.13 | XP_001925942.1 | NP_110437.2    | TXNDC5   | Yes (9+0)     |  |               |  |
| 194041367 | 5.14  | 4 | 798  | 85.9  | 8.32  | 264.22 | XP_001924516.1 | NP_037468.1    | SEC61A1  | Yes (9+0)     |  |               |  |
| 194042025 | 6.78  | 6 | 826  | 93.5  | 7.72  | 262.44 | XP_001927910.1 | NP_065969.3    | GPAM     | Yes (9+0)     |  | Mitochondrion |  |
| 195539478 | 7.58  | 5 | 871  | 98.2  | 7.50  | 261.61 | NP_001124201.1 | NP_067638.3    | TRPV4    | -             |  |               |  |
| 194035155 | 7.10  | 6 | 873  | 99.5  | 8.57  | 261.14 | XP_001925514.1 | NP_009145.1    | SEC63    | Yes (9+0)     |  |               |  |
| 194034987 | 24.86 | 5 | 185  | 20.4  | 5.27  | 260.98 | XP_001926469.1 | NP_001073936.1 | MYO5B    | Yes (9+0)     |  |               |  |
| 194041118 | 13.37 | 5 | 374  | 41.8  | 7.37  | 259.38 | XP_001926115.1 | NP_064576.1    | MRPS22   | -             |  | Mitochondrion |  |
| 194040827 | 20.92 | 7 | 325  | 34.2  | 8.94  | 258.25 | XP_001925834.1 | NP_031361.2    | DLEC1    | -             |  |               |  |
| 47522662  | 17.01 | 6 | 194  | 21.6  | 4.70  | 257.61 | NP_999076.1    | NP_006658.1    | PGRMC1   | Yes (9+0)     |  |               |  |
| 3746944   | 31.85 | 7 | 135  | 15.1  | 5.01  | 257.49 | AAC64130.1     | NP_002624.2    | PGM1     | Yes (9+2/9+0) |  |               |  |
| 194042214 | 5.80  | 5 | 345  | 37.1  | 9.89  | 256.87 | XP_001927462.1 | NP_055209.2    | GHITM    | Yes (9+0)     |  |               |  |
| 158518476 | 23.19 | 7 | 332  | 36.8  | 8.60  | 256.69 | NP_001103527.1 | NP_036371.1    | SIRT3    | -             |  | Mitochondrion |  |
| 56711366  | 20.77 | 6 | 260  | 29.4  | 7.85  | 256.56 | NP_001008688.1 | NP_005172.1    | CA3      | -             |  |               |  |
| 194037724 | 6.76  | 6 | 710  | 80.5  | 9.06  | 255.98 | XP_001928177.1 | NP_059136.2    | MDM1     | Yes (9+0)     |  |               |  |
| 47523632  | 13.39 | 7 | 239  | 27.3  | 5.57  | 255.20 | NP_999444.1    | NP_002809.2    | PSME2    | -             |  |               |  |
| 112980817 | 17.54 | 6 | 211  | 24.6  | 11.18 | 254.76 | ABI29190.1     | NP_000959.2    | RPL4     | -             |  | Ribosome      |  |
| 194043670 | 7.04  | 3 | 341  | 39.9  | 6.89  | 253.75 | XP_001924776.1 | NP_057373.1    | CAB39    | -             |  |               |  |
| 262272069 | 6.97  | 3 | 445  | 51.5  | 6.93  | 253.74 | NP_001160145.1 | NP_003809.1    | CDS2     | Yes (9+0)     |  | Mitochondrion |  |
| 194038961 | 17.59 | 6 | 216  | 24.2  | 7.39  | 251.36 | XP_001929102.1 | NP_116235.2    | RAB2B    | Yes (9+2/9+0) |  |               |  |
| 68132074  | 47.11 | 4 | 121  | 13.7  | 6.77  | 250.17 | AAY85303.1     | NP_055040.2    | PPP2R1A  | Yes (9+2/9+0) |  |               |  |
| 23598087  | 14.20 | 7 | 169  | 18.8  | 8.65  | 249.97 | AAN35094.1     |                |          |               |  |               |  |
| 194041927 | 14.41 | 5 | 236  | 26.7  | 8.07  | 248.31 | XP_001925933.1 | NP_005727.1    | ACTR1A   | Yes (9+2/9+0) |  |               |  |
| 194034199 | 17.34 | 6 | 248  | 27.6  | 5.44  | 247.81 | XP_001928042.1 | NP_002779.1    | PSMA3    | Yes (9+0)     |  |               |  |
| 29888113  | 10.20 | 4 | 255  | 28.1  | 5.71  | 246.23 | AAP03004.1     |                |          |               |  |               |  |
| 162138213 | 6.27  | 3 | 558  | 62.9  | 8.25  | 245.96 | ABX82812.1     | NP_066983.1    | BAT5     | -             |  |               |  |
| 194036686 | 14.08 | 3 | 206  | 21.6  | 8.47  | 245.82 | XP_001926083.1 | NP_001158228.1 | ASPH     | -             |  |               |  |
| 47523420  | 6.87  | 5 | 335  | 36.5  | 6.77  | 245.53 | NP_999331.1    | NP_055290.1    | DHDH     | -             |  |               |  |
| 22651586  | 14.49 | 4 | 276  | 31.8  | 8.66  | 245.25 | AAMO1192.1     | NP_002728.1    | PRKCA    | Yes (9+2/9+0) |  |               |  |
| 47523694  | 6.02  | 4 | 266  | 28.1  | 5.20  | 245.01 | NP_999483      | NP_001003962.1 | CAPNS1   | Yes (9+2/9+0) |  |               |  |
| 194042938 | 1.33  | 7 | 676  | 79.5  | 8.73  | 243.66 | XP_001929381.1 | NP_001137251.1 | IFT81    | Yes (9+2/9+0) |  |               |  |
| 194036695 | 9.06  | 4 | 298  | 31.7  | 9.70  | 243.36 | XP_001926739.1 | NP_002856.1    | RAB2A    | Yes (9+2/9+0) |  |               |  |
| 194038538 | 12.58 | 6 | 469  | 50.6  | 7.47  | 242.73 | XP_001929141.1 | NP_872282.1    | COQ6     | -             |  | Mitochondrion |  |
| 194040293 | 19.62 | 7 | 423  | 45.1  | 6.80  | 242.36 | XP_001925503.1 | NP_003181.3    | TAPBP    | -             |  |               |  |
| 194044054 | 18.06 | 8 | 227  | 26.0  | 6.90  | 242.23 | XP_001924754.1 | NP_699174.1    | ENPP6    | -             |  |               |  |
| 47522874  | 17.11 | 5 | 380  | 42.9  | 5.35  | 242.20 | NP_999191.1    | NP_002725.1    | PRKAR1A  | Yes (9+2/9+0) |  |               |  |
| 47523668  | 21.94 | 7 | 155  | 17.6  | 9.66  | 241.81 | NP_999465.1    | NP_665735.1    | MGST1    | -             |  | Mitochondrion |  |
| 194036345 | 9.17  | 6 | 763  | 87.1  | 5.71  | 240.72 | XP_001926313.1 | NP_001002811.1 | PDE4DIP  | Yes (9+2/9+0) |  |               |  |
| 50604627  | 8.20  | 5 | 683  | 75.9  | 7.69  | 238.92 | AAT79534.1     | NP_001986.2    | ACSL1    | -             |  | Mitochondrion |  |
| 194044904 | 2.19  | 1 | 411  | 44.9  | 6.42  | 238.77 | XP_001926493.1 | NP_001116078.1 | LAMP2    | -             |  |               |  |
| 38569737  | 2.40  | 5 | 1418 | 161.0 | 6.34  | 237.37 | AAR24388.1     | NP_001009567.1 | MRC1L1   | -             |  |               |  |
| 13569571  | 20.97 | 4 | 267  | 30.0  | 5.38  | 237.31 | AAK31151.1     | NP_002600.1    | PDGFRB   | Yes (9+0)     |  |               |  |
| 194044500 | 8.38  | 4 | 489  | 53.9  | 5.49  | 237.20 | XP_001929362.1 | NP_000169.1    | GSS      | -             |  |               |  |
| 2970693   | 4.92  | 4 | 996  | 114.9 | 7.65  | 237.20 | AAC06039.1     | NP_002218.2    | JAK1     | -             |  |               |  |
| 154147607 | 9.57  | 6 | 700  | 79.8  | 4.98  | 236.40 | NP_001093658.1 | NP_001739.2    | CAPN2    | Yes (9+2/9+0) |  |               |  |
| 212549619 | 14.53 | 6 | 468  | 54.2  | 6.15  | 236.32 | NP_001131099.1 | NP_055399.1    | ERO1L    | -             |  |               |  |
| 194036298 | 3.91  | 4 | 742  | 82.6  | 5.57  | 234.34 | XP_001926797.1 | NP_055664.3    | SV2A     | Yes (9+0)     |  |               |  |
| 194044996 | 19.19 | 5 | 198  | 22.2  | 9.92  | 234.08 | XP_001928223.1 | NP_000998.1    | RPS4X    | Yes (9+0)     |  | Ribosome      |  |
| 157427738 | 13.23 | 6 | 310  | 33.6  | 8.43  | 233.33 | NP_001098778.1 | NP_036373.1    | SIRT5    | -             |  |               |  |
| 194036543 | 9.14  | 5 | 514  | 58.6  | 6.71  | 233.09 | XP_001925705.1 | NP_006504.2    | SARS     | Yes (9+0)     |  |               |  |
| 29335683  | 26.27 | 6 | 118  | 13.8  | 4.55  | 232.64 | CAD83090.1     | NP_002046.1    | GFAP     | Yes (9+0)     |  |               |  |
| 194042568 | 5.97  | 6 | 670  | 73.1  | 5.76  | 231.89 | XP_001924892.1 | NP_005637.3    | TARBP1   | -             |  |               |  |

|           |       |   |      |       |       |        |                |                |           |               |               |
|-----------|-------|---|------|-------|-------|--------|----------------|----------------|-----------|---------------|---------------|
| 47522728  | 4.14  | 5 | 1086 | 120.7 | 6.57  | 231.30 | NP_999114.1    | NP_005063.1    | SLC12A4   | -             |               |
| 298160993 | 7.28  | 3 | 151  | 16.5  | 6.76  | 231.20 | NP_001177169   | NP_005267.2    | GPD1      | Yes (9+2)     |               |
| 194041396 | 16.91 | 6 | 207  | 22.2  | 9.26  | 230.84 | XP_001928827.1 | NP_001689.1    | AUH       | -             | Mitochondrion |
| 194036727 | 7.07  | 5 | 580  | 64.2  | 5.69  | 230.33 | XP_001926285.1 | NP_002341.1    | LYN       | -             |               |
| 113205780 | 17.58 | 5 | 330  | 35.2  | 8.15  | 229.97 | NP_001038049.1 | NP_001880.2    | CRYZ      | Yes (9+0)     |               |
| 194035496 | 3.76  | 4 | 691  | 75.6  | 6.49  | 229.46 | XP_001925284.1 | NP_079527.1    | ARHGAP39  | -             |               |
| 194042639 | 2.43  | 1 | 535  | 57.8  | 9.35  | 229.35 | XP_001925518.1 | NP_004569.2    | RAB4A     | Yes (9+2/9+0) |               |
| 194042006 | 7.18  | 7 | 599  | 67.1  | 5.82  | 227.59 | XP_001924595.1 | NP_065116.3    | XPNPEP1   | -             |               |
| 1916278   | 51.95 | 5 | 77   | 8.7   | 7.12  | 226.22 | AAB51264.1     | NP_000500.2    | FGG       | -             | Serum         |
| 1839512   | 10.34 | 3 | 174  | 19.1  | 5.43  | 225.50 | AAB47132.1     | NP_001093422.2 | ITPR1     | -             |               |
| 54020970  | 3.92  | 2 | 536  | 59.8  | 7.94  | 224.41 | NP_001005730.1 | NP_001005750.1 | GBA       | -             |               |
| 164664472 | 7.14  | 4 | 602  | 69.9  | 8.18  | 224.04 | NP_001106922.1 | NP_006236.1    | PPP2R5D   | Yes (9+0)     |               |
| 194037976 | 13.37 | 3 | 344  | 38.1  | 6.30  | 222.45 | XP_001925820.1 | NP_110437.2    | TXNDC5    | Yes (9+0)     |               |
| 194038855 | 6.03  | 2 | 348  | 37.9  | 7.24  | 221.58 | XP_001928049.1 | NP_057660.2    | GMFR2     | -             |               |
| 294489384 | 5.93  | 6 | 894  | 99.4  | 8.48  | 221.56 | NP_001170960.1 | NP_064504.2    | ZC3HAV1   | -             |               |
| 116175265 | 10.03 | 4 | 299  | 33.1  | 5.90  | 221.32 | NP_001070688.1 | NP_690608.1    | RGN       | -             |               |
| 162952052 | 12.84 | 6 | 623  | 67.8  | 7.49  | 221.04 | NP_001106151.1 | NP_001055.1    | TKT       | Yes (9+0)     |               |
| 194035236 | 3.54  | 5 | 508  | 55.9  | 6.98  | 219.82 | XP_001924454.1 | NP_056414.1    | PGM3      | -             |               |
| 4538854   | 9.25  | 5 | 465  | 54.2  | 6.76  | 219.67 | CAB39532.1     | NP_998784.1    | ATP6V1H   | Yes (9+0)     |               |
| 166236027 | 19.69 | 4 | 320  | 35.0  | 6.70  | 219.62 | ABY85805.1     |                |           | -             | Serum         |
| 194036794 | 23.62 | 3 | 127  | 14.2  | 10.43 | 217.65 | XP_001928685.1 | NP_001137146.1 | BRP44     | -             |               |
| 198282001 | 10.57 | 5 | 246  | 28.7  | 9.60  | 217.65 | NP_001123683.1 | NP_003192.1    | TFAM      | -             | Mitochondrion |
| 17062056  | 43.59 | 4 | 78   | 9.1   | 4.60  | 217.20 | AAL34983.1     | NP_002046.1    | GFAP      | Yes (9+0)     |               |
| 194036318 | 7.34  | 5 | 259  | 28.4  | 9.74  | 214.57 | XP_001928004.1 | NP_003837.1    | PEX11B    | Yes (9+0)     |               |
| 219521974 | 3.35  | 7 | 537  | 59.0  | 5.71  | 213.66 | NP_001137175.1 | NP_003906.2    | CPNE1     | -             |               |
| 49274615  | 4.72  | 5 | 784  | 86.5  | 5.54  | 213.28 | NP_001001860.1 | NP_001005333.1 | MAGED1    | -             |               |
| 47522862  | 2.80  | 4 | 1214 | 133.4 | 5.83  | 212.38 | NP_999185.1    | NP_001954.2    | EGF       | -             | Serum         |
| 113205774 | 7.40  | 5 | 770  | 88.0  | 6.30  | 211.09 | NP_001038045.1 | NP_003141.2    | STAT3     | Yes (9+0)     |               |
| 194036835 | 4.36  | 4 | 596  | 64.7  | 8.28  | 210.80 | NP_001924895.1 | NP_000687.3    | ALDH9A1   | -             |               |
| 194043696 | 1.02  | 3 | 2357 | 257.7 | 6.76  | 210.75 | XP_001925648.1 | NP_060688.1    | USP40     | -             |               |
| 82465299  | 11.38 | 2 | 167  | 17.7  | 9.38  | 210.70 | CAJ43431.1     | NP_001104026.1 | FLNA      | Yes (9+0)     |               |
| 194037093 | 6.05  | 4 | 314  | 35.7  | 8.16  | 210.58 | XP_001927382.1 | NP_057117.2    | FAM82B    | Yes (9+0)     |               |
| 21636588  | 53.33 | 5 | 45   | 5.0   | 8.73  | 210.31 | AAM70051.1     | NP_001001973.1 | ATP5C1    | -             | Mitochondrion |
| 194043873 | 10.61 | 3 | 179  | 20.5  | 10.23 | 210.20 | XP_001926172.1 | NP_075066.1    | MRPL44    | -             | Mitochondrion |
| 194041813 | 4.18  | 3 | 479  | 54.0  | 8.24  | 209.70 | XP_001929069.1 | NP_060895.1    | PI4K2A    | -             |               |
| 47522666  | 14.21 | 4 | 373  | 42.0  | 6.74  | 207.95 | NP_999074.1    | NP_001028216.1 | GLUL      | Yes (9+0)     |               |
| 194033839 | 12.50 | 3 | 248  | 28.7  | 9.28  | 207.59 | XP_001925441.1 | NP_056284.1    | NIPSNAP3A | Yes (9+0)     |               |
| 22770997  | 11.25 | 4 | 480  | 52.9  | 6.18  | 207.48 | AAN06824.1     | NP_001087240.1 | TXNRD1    | Yes (Global)  |               |
| 194040465 | 10.21 | 3 | 421  | 48.1  | 7.71  | 206.14 | XP_001927489.1 | NP_005923.2    | MIPEP     | -             | Mitochondrion |
| 194033672 | 2.59  | 3 | 810  | 94.0  | 7.94  | 206.04 | XP_001928885.1 | NP_062540.2    | LRRC8A    | Yes (9+2/9+0) |               |
| 226372953 | 12.17 | 4 | 493  | 54.6  | 6.48  | 202.92 | NP_001139772.1 | NP_003079.1    | FSCN1     | Yes (9+0)     |               |
| 562016    | 23.92 | 5 | 209  | 24.0  | 6.23  | 202.31 | AAA82036.1     | NP_006487.1    | GNAI3     | Yes (9+2/9+0) |               |
| 194038861 | 2.61  | 3 | 1073 | 119.7 | 6.67  | 201.56 | XP_001928270.1 | NP_060469.4    | RNF31     | -             |               |
| 89886173  | 3.82  | 5 | 1046 | 116.8 | 6.70  | 200.58 | NP_001034837.1 | NP_858058.1    | OGT       | Yes (9+2/9+0) |               |
| 194042883 | 3.85  | 4 | 1118 | 124.9 | 6.89  | 199.64 | XP_001925813.1 | NP_003950.1    | HIP1R     | Yes (9+0)     |               |
| 194040517 | 4.05  | 4 | 1210 | 137.9 | 8.84  | 199.59 | XP_001928098.1 | NP_075463.2    | FRY       | Yes (9+0)     |               |
| 5835864   | 7.49  | 5 | 347  | 39.0  | 9.76  | 199.10 | NP_008635.1    | YP_002124303.1 | ND2       | -             |               |
| 89574001  | 14.21 | 5 | 359  | 40.5  | 6.86  | 198.46 | ABD77226.1     | NP_005887.2    | IDH1      | Yes (9+0)     |               |
| 58801555  | 7.41  | 4 | 432  | 47.7  | 6.29  | 198.17 | NP_001011727.1 | NP_000678.1    | AHCY      | Yes (9+2/9+0) |               |
| 194037016 | 4.12  | 2 | 582  | 63.9  | 9.25  | 197.62 | XP_001929151.1 | NP_848927.2    | MTDH      | Yes (9+0)     |               |
| 194036565 | 10.97 | 6 | 556  | 62.7  | 5.58  | 197.39 | XP_001927252.1 | NP_001041675.1 | CLCC1     | -             |               |
| 163310773 | 18.39 | 4 | 223  | 23.8  | 4.88  | 196.46 | NP_001090990.2 | NP_006311.2    | PGRMC2    | Yes (9+0)     |               |
| 219382684 | 21.17 | 4 | 222  | 25.9  | 6.71  | 196.07 | ACL14180.1     | NP_002531.3    | ODF2      | Yes (9+2/9+0) |               |
| 158635942 | 10.80 | 5 | 398  | 45.7  | 7.31  | 195.73 | NP_001098775.1 | NP_003253.1    | SEC62     | -             |               |
| 194041066 | 5.43  | 3 | 405  | 44.2  | 6.67  | 194.57 | XP_001929024.1 | NP_002204.2    | ITGB5     | -             |               |
| 47523544  | 1.78  | 3 | 1746 | 191.3 | 5.15  | 193.92 | NP_999395.1    | NP_002151.2    | TNC       | Yes (9+0)     |               |
| 194034795 | 17.26 | 5 | 168  | 18.3  | 9.63  | 193.79 | XP_001924712.1 | NP_067022.1    | SQRDL     | -             | Mitochondrion |
| 41688313  | 5.97  | 4 | 771  | 86.5  | 5.41  | 193.64 | BAD08664.1     | NP_078789.2    | FYCO1     | Yes (9+2/9+0) |               |
| 164708    | 14.12 | 3 | 255  | 28.7  | 7.55  | 190.52 | AAA31133.1     | NP_066289.2    | UBC       | Yes (9+2/9+0) |               |
| 194033405 | 16.12 | 5 | 397  | 41.3  | 7.43  | 189.35 | XP_001928380.1 | NP_005882.2    | ACAT2     | -             |               |
| 194044820 | 8.16  | 2 | 245  | 28.1  | 6.54  | 188.84 | XP_001926441.1 | NP_001028755.2 | ACOT9     | -             | Mitochondrion |
| 343072    | 40.00 | 7 | 25   | 3.0   | 10.17 | 187.70 | AAA32030.1     | YP_003024030.1 | MT-ATP8   | -             | Mitochondrion |
| 194035700 | 9.91  | 3 | 222  | 25.8  | 6.64  | 187.34 | XP_001925233.1 | NP_000635.2    | AGL       | -             |               |
| 148747492 | 3.89  | 3 | 642  | 65.8  | 7.52  | 187.30 | NP_001092053.1 | NP_000414.2    | KRT2      | -             |               |
| 194044290 | 5.94  | 3 | 387  | 44.9  | 7.09  | 185.26 | XP_001926522.1 | NP_055241.1    | SNX5      | -             |               |
| 153012290 | 5.23  | 5 | 153  | 16.9  | 9.58  | 184.77 | ABS50358.1     | NP_006507.2    | SLC2A1    | Yes (9+0)     |               |
| 194035029 | 3.73  | 2 | 429  | 49.4  | 8.84  | 184.76 | XP_001927058.1 | NP_071331.2    | CSNK1G1   | Yes (9+2/9+0) |               |
| 195562223 | 10.67 | 3 | 300  | 34.3  | 7.36  | 184.67 | ACG50182.1     | NP_690601.1    | ARPC2     | -             |               |
| 194044003 | 8.57  | 2 | 140  | 15.8  | 4.88  | 183.66 | XP_001924740.1 | NP_002185.1    | INPP1     | Yes (9+0)     |               |
| 194035562 | 1.75  | 6 | 1085 | 120.3 | 7.42  | 183.43 | XP_001924570.1 | NP_060952.2    | ASAP1     | -             |               |
| 47523636  | 3.16  | 3 | 1234 | 138.5 | 6.68  | 182.40 | NP_999446.1    | NP_000177.2    | CFH       | Yes (9+0)     | Serum         |
| 194037514 | 1.85  | 3 | 594  | 65.4  | 5.06  | 181.08 | XP_001927687.1 | NP_001973.2    | ERBB3     | -             |               |
| 194035979 | 13.43 | 2 | 216  | 24.8  | 9.44  | 181.02 | XP_001924915.1 | NP_078816.2    | MRPL24    | -             | Mitochondrion |
| 194034342 | 4.79  | 5 | 605  | 68.0  | 5.82  | 180.78 | XP_001926644.1 | NP_060264.3    | KIAA1797  | -             |               |
| 190360653 | 6.49  | 3 | 262  | 29.6  | 8.78  | 180.40 | NP_001121932.1 | NP_001073941.1 | FITM2     | -             |               |
| 194041404 | 8.45  | 4 | 485  | 53.9  | 6.28  | 179.59 | XP_001926450.1 | NP_006406.1    | SPTLC1    | Yes (Global)  |               |
| 194044361 | 15.44 | 5 | 298  | 33.4  | 5.47  | 178.92 | XP_001928328.1 | NP_071363.1    | NAPB      | Yes (9+2/9+0) |               |
| 194034043 | 7.93  | 3 | 353  | 38.2  | 8.62  | 178.59 | XP_001925894.1 | NP_036335.1    | GRHPR     | Yes (9+0)     |               |
| 194042090 | 5.56  | 4 | 665  | 74.0  | 8.43  | 178.56 | XP_001925646.1 | NP_079291.2    | HSPA12A   | Yes (9+0)     |               |
| 297591961 | 2.12  | 4 | 614  | 69.4  | 7.72  | 178.07 | NP_001172069   | NP_055051.1    | GNPAT     | Yes (9+0)     |               |
| 22774002  | 5.55  | 3 | 541  | 58.2  | 6.54  | 177.54 | AAN07167.1     |                |           | -             | Serum         |
| 194044496 | 2.57  | 4 | 662  | 70.5  | 5.12  | 177.09 | XP_001929330.1 | NP_821158.2    | GGT7      | -             |               |
| 531145    | 35.14 | 2 | 37   | 4.2   | 9.32  | 175.73 | AAA20914.1     | NP_002464.1    | MYH9      | Yes (9+2/9+0) |               |
| 194035678 | 14.14 | 4 | 290  | 33.1  | 9.35  | 175.65 | XP_001925316.1 | NP_055488.1    | TTC35     | Yes (9+0)     |               |
| 1839510   | 28.03 | 4 | 132  | 14.8  | 5.78  | 175.43 | AAB47131.1     | NP_001093422.2 | ITPR1     | -             |               |



|           |       |   |      |       |       |        |                |                |           |               |               |
|-----------|-------|---|------|-------|-------|--------|----------------|----------------|-----------|---------------|---------------|
| 114326179 | 10.11 | 4 | 188  | 21.5  | 9.52  | 174.52 | NP_001041538.1 | NP_006398.1    | ARL6IP5   | -             |               |
| 194042148 | 4.55  | 4 | 1078 | 119.6 | 5.78  | 172.81 | XP_001927517.1 | NP_009121.1    | SEC23IP   | Yes (9+0)     |               |
| 194041120 | 2.67  | 3 | 1125 | 126.6 | 5.60  | 172.37 | XP_001926139.1 | NP_004757.1    | COPB2     | Yes (9+2/9+0) |               |
| 147223350 | 7.51  | 5 | 892  | 94.1  | 7.08  | 171.03 | CAN13170.1     | NP_000278.3    | PEX6      | -             |               |
| 41688291  | 20.81 | 3 | 149  | 16.8  | 5.54  | 170.70 | BAD08645.1     | NP_078789.2    | FYCO1     | Yes (9+2/9+0) |               |
| 264681474 | 7.48  | 2 | 361  | 40.5  | 8.27  | 170.32 | NP_001161108.1 | NP_057006.1    | NSDHL     | -             |               |
| 194040306 | 1.05  | 5 | 855  | 94.0  | 8.62  | 170.19 | XP_001925606.1 | NP_006763.2    | SYNGAP1   | -             |               |
| 194038431 | 14.68 | 5 | 361  | 38.8  | 5.38  | 169.67 | XP_001925486.1 | NP_001019389.1 | GPHN      | Yes (9+0)     |               |
| 194044250 | 2.49  | 3 | 1124 | 128.1 | 6.10  | 168.82 | XP_001926187.1 | NP_056007.1    | PLCB1     | -             |               |
| 194038715 | 2.78  | 3 | 1223 | 133.9 | 6.43  | 168.34 | XP_001926127.1 | NP_002490.2    | NEO1      | Yes (9+0)     |               |
| 7288152   | 18.09 | 3 | 282  | 31.4  | 7.23  | 168.31 | BAA92850.1     | NP_001975.1    | ESD       | -             |               |
| 194037864 | 13.90 | 4 | 259  | 28.4  | 7.44  | 168.28 | XP_001925656.1 | NP_057403.1    | COP57A    | Yes (9+0)     |               |
| 45359365  | 18.85 | 3 | 122  | 13.5  | 5.02  | 167.51 | AAS59067.1     | NP_056255.2    | MTHFD1L   | -             | Mitochondrion |
| 47523914  | 5.17  | 2 | 503  | 56.8  | 8.12  | 165.81 | NP_999597.1    | NP_000777.1    | CYP51A1   | Yes (Global)  |               |
| 82542245  | 3.33  | 3 | 751  | 84.7  | 4.81  | 165.75 | ABB82034.1     | NP_958817.1    | APP       | -             |               |
| 89275684  | 6.08  | 3 | 296  | 33.4  | 5.97  | 165.69 | ABD66221.1     | NP_000055.2    | C3        | -             | Serum         |
| 194044632 | 3.93  | 3 | 610  | 67.7  | 9.07  | 165.19 | XP_001927442.1 | NP_001118228.1 | PABPC1L   | -             |               |
| 194034444 | 9.35  | 2 | 278  | 31.6  | 4.89  | 165.15 | XP_001928284.1 | NP_110382.3    | TMX1      | -             |               |
| 194042750 | 7.54  | 3 | 398  | 43.6  | 8.53  | 164.69 | XP_001925115.1 | NP_066952.1    | PPA1      | Yes (9+0)     |               |
| 47523688  | 7.63  | 4 | 249  | 28.7  | 7.28  | 164.68 | NP_999476.1    | NP_000793.1    | FOLR1     | -             |               |
| 194035526 | 2.24  | 3 | 1117 | 124.2 | 6.49  | 163.95 | XP_001926231.1 | NP_113654.4    | TRAPPC9   | -             |               |
| 194043481 | 4.06  | 2 | 961  | 104.2 | 6.79  | 163.33 | XP_001929677.1 | NP_001661.1    | ARVCF     | Yes (9+2/9+0) |               |
| 21229475  | 8.92  | 2 | 157  | 17.8  | 9.47  | 163.19 | AAL40813.2     | NP_002047.2    | GFPT1     | -             |               |
| 194042820 | 1.58  | 2 | 1841 | 197.9 | 6.86  | 163.08 | XP_001928205.1 | NP_055852.2    | KIAA0913  | -             |               |
| 194037790 | 8.35  | 5 | 395  | 44.3  | 6.98  | 162.79 | XP_001925095.1 | NP_005495.2    | BCAT1     | Yes (9+0)     |               |
| 148226851 | 12.50 | 4 | 88   | 10.3  | 9.95  | 162.45 | NP_001090933.1 | NP_001003713.1 | ATP5J2    | -             | Mitochondrion |
| 194038274 | 1.65  | 3 | 1942 | 223.4 | 5.34  | 161.74 | XP_001926860.1 | NP_004230.2    | TRIP11    | -             |               |
| 114199061 | 31.00 | 4 | 100  | 10.8  | 5.36  | 161.21 | ABI54124.1     |                |           | -             | Serum         |
| 195182334 | 29.27 | 4 | 82   | 9.3   | 5.36  | 161.15 | CAQ34911.1     | NP_000199.2    | INSR      | -             |               |
| 194038475 | 2.62  | 2 | 496  | 56.2  | 8.54  | 160.52 | XP_001925531.1 | NP_060669.1    | EXD2      | -             |               |
| 194045011 | 1.86  | 3 | 753  | 82.6  | 9.38  | 159.75 | XP_001928754.1 | NP_004290.2    | ABCB7     | -             | Mitochondrion |
| 1754491   | 8.76  | 3 | 388  | 43.9  | 5.67  | 159.73 | BAA09616.1     | NP_000629.3    | VTN       | Yes (9+0)     | Serum         |
| 4995880   | 7.57  | 4 | 317  | 35.3  | 9.09  | 159.60 | CAB44278.1     | NP_002299.2    | LGALS9    | -             |               |
| 9968805   | 8.44  | 2 | 225  | 25.6  | 7.49  | 159.02 | CAC06755.1     | NP_001076.2    | SERPINA3  | -             | Serum         |
| 194040853 | 10.98 | 3 | 255  | 29.4  | 6.46  | 158.84 | XP_001926855.1 | NP_065080.1    | LZTFL1    | -             |               |
| 194040344 | 2.81  | 3 | 1102 | 120.5 | 6.33  | 158.15 | XP_001926579.1 | NP_056060.2    | ANKS1A    | Yes (9+2/9+0) |               |
| 194043541 | 1.41  | 2 | 1704 | 195.9 | 7.85  | 156.93 | XP_001927668.1 | NP_060101.3    | DDX60     | -             |               |
| 47522710  | 2.28  | 1 | 659  | 73.2  | 6.92  | 156.69 | NP_999050.1    | NP_005898.2    | MAN1A1    | -             |               |
| 194043164 | 2.01  | 4 | 2191 | 238.5 | 7.58  | 156.60 | XP_001925559.1 | NP_001138890.1 | TTC28     | -             |               |
| 154147577 | 2.54  | 3 | 1023 | 115.8 | 5.66  | 154.45 | NP_001093664.1 | NP_071451.2    | IFIH1     | -             |               |
| 189086693 | 30.86 | 2 | 81   | 9.8   | 5.06  | 154.06 | ACD75764.1     | NP_000104.1    | TOR1A     | -             |               |
| 67518138  | 2.22  | 2 | 1172 | 129.0 | 5.59  | 153.66 | AAY68305.1     | NP_002200.2    | ITGAL     | -             |               |
| 194035295 | 5.46  | 4 | 623  | 69.5  | 8.59  | 153.05 | XP_001927626.1 | NP_006363.4    | SYNCRIP   | Yes (9+0)     |               |
| 42742504  | 32.73 | 2 | 55   | 6.2   | 9.36  | 153.02 | AAS45280.1     | NP_004353.1    | CLGN      | -             |               |
| 194043781 | 33.87 | 3 | 124  | 13.8  | 7.34  | 152.45 | XP_001928708.1 | NP_005887.2    | IDH1      | Yes (9+0)     |               |
| 78172717  | 6.11  | 4 | 737  | 79.6  | 8.59  | 151.79 | ABB29449.1     | NP_000584.2    | TAP1      | Yes (9+0)     |               |
| 194042618 | 3.66  | 3 | 929  | 102.9 | 8.06  | 150.39 | XP_001924673.1 | NP_031383.1    | COG2      | Yes (9+0)     |               |
| 47523866  | 10.53 | 4 | 342  | 37.8  | 6.80  | 150.28 | NP_999571.1    | NP_620156.1    | GALM      | -             |               |
| 47522764  | 2.76  | 3 | 798  | 88.2  | 5.47  | 150.08 | NP_999133.1    | NP_391988.1    | ITGB1     | -             |               |
| 194041371 | 11.15 | 3 | 278  | 30.7  | 6.24  | 149.19 | XP_001924646.1 | NP_003698.1    | RUVBL1    | Yes (9+0)     |               |
| 194039792 | 1.83  | 4 | 438  | 47.7  | 11.28 | 148.97 | XP_001926215.1 | NP_066408.1    | HIST1H2AG | -             |               |
| 213021241 | 10.16 | 2 | 246  | 27.4  | 6.76  | 148.69 | NP_001132944.1 | NP_002782.1    | PSMA6     | Yes (9+0)     |               |
| 47523644  | 4.64  | 3 | 732  | 81.2  | 5.55  | 148.57 | NP_999088.1    | NP_001631.3    | APEH      | Yes (Global)  |               |
| 194038586 | 5.02  | 3 | 219  | 24.9  | 6.42  | 148.44 | XP_001926746.1 | NP_006818.3    | TMED10    | Yes (9+0)     |               |
| 1399282   | 24.44 | 4 | 135  | 15.0  | 9.03  | 148.22 | AAB03248.1     | NP_000185.1    | HPRT1     | Yes (9+0)     |               |
| 165973438 | 7.81  | 2 | 192  | 20.4  | 10.59 | 147.86 | NP_001107173.1 | NP_543011.2    | C20orf108 | -             |               |
| 194038351 | 3.78  | 1 | 423  | 47.0  | 7.17  | 147.83 | XP_001928857.1 | NP_001076.2    | SERPINA3  | -             | Serum         |
| 194035082 | 5.74  | 3 | 505  | 56.8  | 6.77  | 147.38 | XP_001926297.1 | NP_004989.2    | MYO1E     | -             |               |
| 194034056 | 5.42  | 2 | 517  | 57.4  | 6.61  | 147.07 | XP_001924254.1 | NP_000683.3    | ALDH1B1   | -             | Mitochondrion |
| 157043065 | 1.09  | 1 | 829  | 93.1  | 5.82  | 145.95 | ABV02066.1     | NP_003174.3    | ADAM17    | -             |               |
| 104295129 | 6.01  | 4 | 383  | 42.9  | 4.86  | 145.33 | ABF72034.1     | NP_777283.1    | AK5       | -             |               |
| 38230151  | 18.35 | 1 | 109  | 12.0  | 5.76  | 145.29 | AAR14175.1     | NP_000025.1    | ALDOA     | Yes (9+2/9+0) |               |
| 194035516 | 5.17  | 2 | 580  | 66.2  | 9.07  | 145.05 | XP_001927718   | NP_777582.3    | ADCK5     | -             |               |
| 194041877 | 4.93  | 3 | 203  | 23.2  | 8.82  | 144.17 | XP_001926760.1 | NP_056263.1    | DPCD      | -             |               |
| 194043202 | 4.44  | 2 | 743  | 84.6  | 5.20  | 144.14 | XP_001926499.1 | NP_115580.2    | ASCC2     | -             |               |
| 172072661 | 3.37  | 2 | 505  | 55.2  | 7.23  | 143.54 | NP_001116458.1 | NP_055121.1    | C22orf28  | Yes (9+0)     |               |
| 47523562  | 3.25  | 2 | 338  | 37.9  | 7.42  | 143.19 | NP_999410      | NP_004857.4    | SCAMP1    | Yes (9+0)     |               |
| 194037756 | 12.16 | 3 | 222  | 24.1  | 7.94  | 141.61 | XP_001925094.1 | NP_055814.1    | RAB21     | Yes (9+2/9+0) |               |
| 190360623 | 2.65  | 2 | 980  | 109.4 | 6.46  | 141.10 | NP_001121934.1 | NP_056392.2    | RAI14     | -             |               |
| 194035181 | 5.91  | 4 | 423  | 47.5  | 6.98  | 140.95 | XP_001925325.1 | NP_003071.2    | SMPD2     | -             |               |
| 194041204 | 3.94  | 2 | 660  | 73.5  | 7.14  | 139.68 | XP_001924052.1 | NP_002209.2    | ITIH4     | -             | Serum         |
| 1845      | 9.36  | 3 | 406  | 45.3  | 5.96  | 138.79 | CAA48565.1     | NP_000657.1    | ACY1      | -             |               |
| 47522718  | 8.85  | 2 | 113  | 12.5  | 7.08  | 138.66 | NP_999109.1    | NP_001335.1    | DAD1      | -             |               |
| 194033614 | 3.32  | 3 | 723  | 83.3  | 5.73  | 138.01 | XP_001924733.1 | NP_612370.3    | LRSAM1    | -             |               |
| 62948008  | 11.62 | 3 | 198  | 22.4  | 6.11  | 137.98 | AAV23007.1     | NP_001028675.1 | SAR1B     | Yes (9+2/9+0) |               |
| 3116334   | 19.05 | 3 | 84   | 9.4   | 4.84  | 137.94 | BAA25983.1     | NP_066293.2    | KRT34     | -             |               |
| 194035291 | 0.95  | 3 | 946  | 110.2 | 6.67  | 137.77 | XP_001927354.1 | NP_722523.1    | SNX14     | -             |               |
| 194043991 | 2.75  | 3 | 363  | 41.7  | 8.18  | 137.45 | XP_001926651.1 | NP_060941.2    | ZC3H15    | -             |               |
| 194041887 | 2.83  | 4 | 849  | 95.4  | 5.03  | 137.32 | XP_001927694.1 | NP_001135906.1 | MGEA5     | -             |               |
| 194038441 | 13.77 | 4 | 247  | 28.2  | 9.36  | 137.25 | XP_001928349.1 | NP_057078.1    | ATP6V1D   | Yes (9+0)     |               |
| 188998336 | 5.08  | 2 | 433  | 49.0  | 7.88  | 136.07 | ACD67895.1     | NP_000160.1    | GLA       | -             |               |
| 194042374 | 2.42  | 2 | 661  | 71.3  | 5.80  | 135.92 | XP_001925493.1 | NP_001005751.1 | FAM21A    | -             |               |
| 23598071  | 19.84 | 3 | 257  | 29.2  | 8.18  | 135.89 | AAN35088.1     |                |           | -             |               |
| 166796061 | 14.48 | 3 | 297  | 34.4  | 9.72  | 135.84 | NP_001107756.1 | NP_000960.2    | RPL5      | -             | Ribosome      |
| 194041231 | 2.04  | 2 | 1520 | 168.2 | 5.02  | 135.58 | XP_001925389.1 | NP_009115.2    | NISCH     | -             |               |

|           |       |   |      |       |       |        |                |                |           |               |               |
|-----------|-------|---|------|-------|-------|--------|----------------|----------------|-----------|---------------|---------------|
| 58618085  | 16.30 | 2 | 184  | 21.3  | 8.34  | 134.95 | AAW80613.1     | NP_006200.3    | ENPP2     | -             |               |
| 218664471 | 3.59  | 2 | 334  | 37.6  | 7.30  | 134.30 | NP_001136304.1 | NP_037415.1    | MAT2B     | -             |               |
| 194038797 | 13.81 | 3 | 210  | 23.3  | 7.17  | 134.05 | XP_001924362.1 | NP_079428.2    | NUBPL     | -             |               |
| 48675947  | 9.39  | 2 | 330  | 37.4  | 6.76  | 133.89 | NP_001001642.1 | NP_002724.1    | PRKAG1    | Yes (9+0)     |               |
| 189232885 | 16.50 | 3 | 200  | 22.2  | 9.66  | 133.48 | CAQ34905.1     | NP_067026.3    | SRPRB     | Yes (9+0)     |               |
| 194018716 | 10.94 | 3 | 64   | 7.4   | 9.52  | 133.09 | NP_001123450.1 | NP_037519.2    | UQCR10    | -             |               |
| 194044404 | 10.42 | 4 | 307  | 34.5  | 8.07  | 132.83 | XP_001924843.1 | NP_110438.1    | MRPS26    | -             | Mitochondrion |
| 2959454   | 3.90  | 4 | 462  | 52.6  | 5.27  | 131.64 | BAA25134.1     | NP_001918.3    | DES       | -             |               |
| 194037253 | 6.02  | 4 | 166  | 17.9  | 9.50  | 131.16 | XP_001925123   | NP_002464.1    | MYH9      | Yes (9+2/9+0) |               |
| 194037024 | 5.56  | 3 | 414  | 47.6  | 8.91  | 130.69 | XP_001929306.1 | NP_057026.3    | MTERFD1   | -             | Mitochondrion |
| 194035577 | 8.01  | 2 | 312  | 34.7  | 5.55  | 130.33 | XP_001928100.1 | NP_777571.1    | FAM84B    | -             |               |
| 45269007  | 25.20 | 2 | 123  | 14.1  | 7.34  | 129.86 | AAS55916.1     | NP_005497.1    | SCARB2    | -             |               |
| 194042069 | 1.31  | 3 | 765  | 86.2  | 5.22  | 129.35 | XP_001929397.1 | NP_065991.3    | FAM160B1  | -             |               |
| 14134126  | 3.96  | 3 | 227  | 25.6  | 8.79  | 129.34 | AAK54250.1     | NP_000560.5    | FCGR3A    | -             |               |
| 194041183 | 4.67  | 3 | 835  | 89.4  | 4.49  | 129.06 | XP_001924305.1 | NP_002366.2    | MAP4      | Yes (9+0)     |               |
| 190360617 | 4.21  | 3 | 285  | 31.5  | 8.97  | 127.57 | NP_001121924.1 | NP_079119.3    | CYBRD1    | -             |               |
| 212549625 | 9.85  | 3 | 264  | 29.9  | 9.74  | 127.16 | NP_001131091.1 | NP_000997.1    | RPS3A     | -             | Ribosome      |
| 194040980 | 2.60  | 1 | 539  | 60.7  | 6.39  | 126.67 | XP_001928521.1 | NP_005078.2    | FXR1      | Yes (9+0)     |               |
| 194033457 | 8.47  | 3 | 307  | 32.9  | 6.43  | 126.32 | XP_001924766.1 | NP_056255.2    | MTHFD1L   | -             | Mitochondrion |
| 16798651  | 11.11 | 2 | 153  | 18.1  | 11.66 | 124.84 | AAL29467.1     | NP_000972.1    | RPL19     | -             | Ribosome      |
| 5835865   | 3.31  | 2 | 514  | 56.9  | 6.70  | 124.77 | NP_008636.1    | YP_003024028.1 | MT-CO1    | -             | Mitochondrion |
| 5733715   | 33.33 | 2 | 84   | 9.5   | 6.18  | 124.63 | AAD49731.1     | NP_002128.1    | HNRNPA2B1 | -             |               |
| 164511    | 9.39  | 1 | 181  | 19.1  | 7.20  | 124.55 | AAA03572.1     |                |           | -             | Serum         |
| 113205654 | 3.82  | 3 | 419  | 47.4  | 8.21  | 124.49 | NP_001038016.1 | NP_001816.2    | CKMT2     | -             | Mitochondrion |
| 58332862  | 2.66  | 2 | 413  | 43.9  | 8.88  | 123.90 | XP_001924600.1 | NP_001004426.1 | PLA2G6    | -             |               |
| 194040687 | 1.89  | 1 | 740  | 81.1  | 8.46  | 123.61 | XP_001926834.1 | NP_005757.1    | FARP1     | -             |               |
| 194033870 | 0.74  | 1 | 1478 | 165.6 | 7.08  | 123.48 | XP_001924429.1 | NP_003631.2    | IKBKAP    | Yes (9+0)     |               |
| 285818458 | 1.25  | 1 | 883  | 99.2  | 6.52  | 123.08 | ADC38902.1     | NP_689596.4    | DIS3L2    | -             |               |
| 194044443 | 5.75  | 2 | 174  | 19.1  | 6.29  | 123.01 | XP_001926038.1 | NP_054731.2    | REM1      | -             |               |
| 194041521 | 11.47 | 2 | 218  | 23.8  | 5.85  | 122.29 | XP_001927627.1 | NP_004322.1    | BNIP3L    | -             | Mitochondrion |
| 194040789 | 4.73  | 2 | 402  | 44.9  | 8.37  | 122.13 | XP_001925335.1 | NP_612390.1    | OXNAD1    | -             |               |
| 194041866 | 20.14 | 2 | 144  | 16.3  | 7.34  | 121.90 | XP_001924538.1 | NP_112233.2    | SFXN3     | -             | Mitochondrion |
| 194033873 | 0.92  | 4 | 870  | 97.4  | 9.22  | 121.89 | XP_001924583.1 | NP_061987.3    | EPB41L4B  | -             | Serum         |
| 285818422 | 2.82  | 2 | 959  | 106.1 | 6.28  | 121.85 | ADC38884.1     | NP_004434.2    | EPHB3     | -             |               |
| 194033682 | 2.70  | 3 | 593  | 65.6  | 5.55  | 121.78 | XP_001928994.1 | NP_116198.2    | FAM73B    | -             |               |
| 194038629 | 2.08  | 2 | 529  | 59.7  | 8.59  | 121.74 | XP_001926766.1 | NP_065154.2    | ADCK1     | Yes (9+0)     |               |
| 194037330 | 3.50  | 3 | 515  | 54.9  | 6.46  | 120.81 | XP_001927253.1 | NP_002263.2    | KRT4      | -             |               |
| 194038625 | 3.25  | 2 | 338  | 38.3  | 5.64  | 119.91 | XP_001928925   | NP_036243.1    | AHSA1     | -             |               |
| 36244564  | 42.31 | 2 | 52   | 5.8   | 6.51  | 119.67 | AAQ85119.1     | NP_002799.3    | PSMD2     | Yes (9+0)     |               |
| 8489819   | 4.72  | 3 | 381  | 43.3  | 8.43  | 119.54 | AAF75766.1     | NP_000929.1    | POLR2B    | -             |               |
| 194034171 | 17.86 | 3 | 196  | 20.5  | 5.48  | 119.37 | XP_001924327.1 | NP_055973.2    | KANK1     | -             |               |
| 194044581 | 2.97  | 2 | 1077 | 119.9 | 5.74  | 119.27 | XP_001925792.1 | NP_055472.1    | KIAA0406  | -             |               |
| 219521970 | 6.30  | 2 | 365  | 41.9  | 9.14  | 118.92 | NP_001137173.1 | NP_060831.2    | AGPAT5    | Yes (9+0)     |               |
| 194040555 | 7.77  | 2 | 193  | 21.4  | 6.35  | 118.78 | XP_001926949.1 | NP_037470.1    | ALG5      | -             |               |
| 194042433 | 2.94  | 3 | 374  | 41.0  | 8.19  | 118.50 | XP_001925032.1 | NP_004888.2    | MINPP1    | -             |               |
| 194036775 | 5.52  | 4 | 743  | 82.4  | 5.48  | 118.44 | XP_001928008.1 | NP_851607.2    | SCYL3     | -             |               |
| 194037044 | 1.62  | 3 | 555  | 62.8  | 6.64  | 118.37 | XP_001924873.1 | NP_060914.2    | PDP1      | -             | Mitochondrion |
| 47522790  | 4.62  | 2 | 303  | 33.2  | 8.05  | 118.27 | NP_999147.1    | NP_001768.1    | CD47      | Yes (9+0)     |               |
| 55742638  | 2.61  | 2 | 537  | 58.4  | 6.65  | 118.22 | NP_998981.1    | NP_000192.2    | ICAM1     | -             |               |
| 194044056 | 2.34  | 1 | 556  | 64.6  | 6.24  | 118.11 | XP_001926144.1 | NP_114159.2    | SNX25     | -             |               |
| 147906477 | 7.34  | 2 | 177  | 19.8  | 9.85  | 117.77 | NP_001090946.1 | NP_009035.3    | RPL10A    | Yes (9+2)     | Ribosome      |
| 48374071  | 9.18  | 2 | 316  | 35.8  | 6.29  | 117.07 | NP_001001539.1 | NP_001619.1    | AKR1B1    | Yes (9+0)     |               |
| 4454998   | 30.30 | 3 | 99   | 10.9  | 4.67  | 116.50 | AAD21027.1     | NP_006807.1    | LMAN2     | -             |               |
| 148747138 | 3.02  | 3 | 596  | 67.5  | 6.96  | 116.08 | NP_001092074.1 | NP_075067.2    | VPS33A    | Yes (9+0)     |               |
| 194034487 | 4.15  | 2 | 289  | 31.7  | 9.31  | 115.66 | XP_001927561.1 | NP_068374.1    | OTX2      | -             |               |
| 194044585 | 6.63  | 2 | 347  | 38.9  | 5.91  | 114.95 | XP_001928975.1 | NP_065069.1    | RALGAPB   | -             |               |
| 148225574 | 25.00 | 4 | 76   | 8.8   | 10.23 | 114.83 | NP_001090942.1 | NP_004365.1    | COX6C     | -             | Mitochondrion |
| 194036332 | 5.37  | 2 | 428  | 48.5  | 7.75  | 114.61 | XP_001928381.1 | NP_057445.3    | ACP6      | -             |               |
| 4098624   | 17.36 | 2 | 121  | 14.4  | 4.82  | 114.37 | AAD00349.1     | NP_002529.1    | OCLN      | -             |               |
| 194039558 | 4.69  | 2 | 597  | 66.2  | 5.82  | 114.07 | XP_001926980.1 | NP_078856.4    | EFTUD1    | -             |               |
| 62700699  | 20.99 | 3 | 81   | 9.0   | 5.86  | 113.81 | CAI79418.1     | NP_004512.1    | KIF5B     | Yes (9+2/9+0) |               |
| 194037231 | 1.55  | 2 | 776  | 83.2  | 8.54  | 113.61 | XP_001924679.1 | NP_203744.1    | MICALL1   | -             |               |
| 292485838 | 3.49  | 2 | 887  | 96.5  | 6.67  | 113.42 | ADE28534.1     | NP_660208.2    | SPATA5    | -             | Mitochondrion |
| 194034081 | 2.48  | 1 | 524  | 58.5  | 6.49  | 113.09 | XP_001925068.1 | NP_060891.3    | TBC1D2    | -             |               |
| 194044383 | 1.93  | 2 | 1292 | 143.9 | 6.96  | 112.59 | XP_001927324.1 | NP_647537.1    | ATRN      | -             |               |
| 262036913 | 8.40  | 2 | 250  | 27.8  | 9.45  | 111.42 | BAI47592.1     | NP_006402.1    | AGPAT1    | -             |               |
| 83026499  | 10.31 | 2 | 97   | 10.9  | 4.54  | 111.38 | ABB96285.1     | NP_068839.1    | ITM2B     | -             |               |
| 194043799 | 2.53  | 2 | 316  | 35.5  | 8.02  | 111.06 | XP_001926406.1 | NP_006046.1    | LANCL1    | -             |               |
| 55742703  | 5.14  | 1 | 253  | 28.9  | 6.93  | 110.43 | NP_999018.1    | NP_001107008.1 | FOLR2     | -             |               |
| 195539470 | 5.79  | 2 | 484  | 55.0  | 7.03  | 110.17 | NP_001124205.1 | NP_000017.1    | ADSL      | -             |               |
| 194042842 | 6.49  | 1 | 262  | 28.7  | 8.02  | 109.06 | XP_001929190.1 | NP_653190.2    | COMTD1    | Yes (9+0)     |               |
| 194033849 | 3.78  | 2 | 793  | 88.3  | 8.18  | 108.82 | XP_001925175.1 | NP_536856.2    | SLC44A1   | -             |               |
| 194018664 | 3.02  | 1 | 463  | 52.4  | 6.13  | 108.14 | NP_001123430   | NP_000479.1    | SERPINC1  | -             | Serum         |
| 55167422  | 9.12  | 2 | 274  | 29.4  | 6.38  | 107.95 | BAD67216       |                |           | -             | Serum         |
| 72535184  | 13.81 | 2 | 181  | 20.4  | 5.72  | 107.58 | NP_001026954.1 | NP_001168.1    | ARL1      | Yes (9+2/9+0) |               |
| 194034243 | 0.32  | 2 | 6165 | 712.1 | 5.27  | 107.46 | XP_001925379.1 | NP_878918.2    | SYNE2     | Yes (9+0)     |               |
| 285818488 | 2.11  | 2 | 710  | 78.5  | 7.27  | 106.19 | ADC38917.1     | NP_008864.3    | SLC5A3    | -             |               |
| 194035040 | 1.70  | 2 | 648  | 70.2  | 7.59  | 105.80 | XP_001928776.1 | NP_003913.3    | HERC1     | -             |               |
| 178056462 | 7.34  | 2 | 354  | 39.2  | 5.40  | 105.80 | NP_001116695.1 | NP_000296.2    | PON2      | Yes (9+0)     |               |
| 194037912 | 4.23  | 3 | 852  | 96.9  | 5.78  | 105.71 | XP_001924655.1 | NP_037509.3    | PDZRN4    | -             |               |
| 4579751   | 2.09  | 1 | 815  | 89.6  | 5.39  | 104.65 | BAA75064.1     | NP_001137357.1 | PPP1R12A  | -             |               |
| 148724910 | 4.37  | 2 | 549  | 61.1  | 6.64  | 104.44 | CAN87698.1     | NP_001701.2    | CFB       | -             | Serum         |
| 190589916 | 2.44  | 1 | 574  | 65.6  | 7.03  | 104.44 | ACE79217.1     | NP_002825.3    | PTPN11    | -             |               |
| 66352015  | 4.72  | 2 | 572  | 65.1  | 6.84  | 104.05 | AAY44742.1     | NP_733821.1    | LMNA      | -             |               |
| 194034693 | 4.42  | 4 | 724  | 84.8  | 7.61  | 104.01 | XP_001928744.1 | NP_004739.3    | CCPG1     | -             |               |

|           |       |   |      |       |       |        |                 |                |          |               |               |
|-----------|-------|---|------|-------|-------|--------|-----------------|----------------|----------|---------------|---------------|
| 1911      | 3.55  | 1 | 338  | 39.3  | 8.56  | 103.84 | CAA29415.1      | NP_002722.1    | PRKACB   | Yes (9+2/9+0) |               |
| 47523538  | 5.21  | 4 | 557  | 59.8  | 9.17  | 103.73 | NP_999396.1     | NP_005147.3    | ROD1     | Yes (9+0)     |               |
| 285818484 | 6.75  | 2 | 326  | 36.1  | 8.88  | 102.71 | ADC38915.1      | NP_001410.2    | ELAVL1   | Yes (9+0)     |               |
| 194043406 | 1.36  | 2 | 664  | 74.8  | 5.62  | 102.13 | XP_001929625.1  | NP_116164.2    | KLHL22   | -             |               |
| 73853886  | 4.98  | 1 | 221  | 24.9  | 5.35  | 101.67 | NP_001027528.1  | NP_899059.1    | RAB27A   | Yes (9+2/9+0) |               |
| 86450157  | 2.83  | 2 | 600  | 66.5  | 5.91  | 101.54 | ABC96267.1      | NP_057441.1    | LIMA1    | Yes (9+0)     |               |
| 194040661 | 2.20  | 2 | 910  | 103.0 | 8.32  | 101.52 | XP_001928146.1  | NP_006313.1    | TUBGCP3  | Yes (9+0)     |               |
| 190589912 | 3.56  | 1 | 337  | 39.0  | 9.03  | 101.51 | ACE79215.1      | NP_002721.1    | PRKACA   | Yes (9+2/9+0) |               |
| 194042012 | 3.12  | 2 | 674  | 75.4  | 6.81  | 100.61 | XP_001924864.1  | NP_058432.1    | ADD3     | Yes (9+0)     |               |
| 194034773 | 0.98  | 2 | 1018 | 111.6 | 8.22  | 100.52 | XP_001926177.1  | NP_000329.2    | SLC12A1  | -             |               |
| 118403822 | 6.78  | 2 | 236  | 25.7  | 5.29  | 100.51 | NP_001072147.1  | NP_004347.1    | CD81     | Yes (9+0)     |               |
| 36244528  | 30.56 | 1 | 36   | 4.2   | 6.60  | 99.89  | AAQ85117.1      | NP_002796.4    | PSMC5    | Yes (9+2/9+0) |               |
| 113205776 | 5.93  | 2 | 405  | 44.5  | 6.90  | 98.55  | NP_001038050.1  | NP_001893.2    | CTH      | -             |               |
| 47523440  | 1.69  | 1 | 650  | 70.2  | 7.43  | 98.39  | NP_999343.1     | NP_005107.4    | SLC23A2  | -             |               |
| 60097959  | 0.41  | 1 | 3674 | 424.6 | 5.91  | 97.65  | NP_001012408.1  | NP_003998.1    | DMD      | Yes (9+2/9+0) |               |
| 222136624 | 8.71  | 2 | 241  | 25.6  | 5.02  | 97.33  | NP_001138398.1  | NP_002789.1    | PSMB6    | -             |               |
| 194041943 | 4.04  | 1 | 322  | 36.1  | 9.42  | 96.55  | XP_001929154.1  | NP_849189.1    | SFXN2    | -             | Mitochondrion |
| 154101328 | 5.21  | 1 | 211  | 23.7  | 6.64  | 96.22  | ABS58490.1      | NP_803882.1    | CYP20A1  | -             |               |
| 148535230 | 0.60  | 1 | 2340 | 264.6 | 6.46  | 96.17  | ABQ85554.1      | NP_942131.1    | ACACA    | Yes (9+0)     |               |
| 194038650 | 4.96  | 2 | 423  | 46.4  | 5.55  | 96.02  | XP_001926526.1  | NP_002426.1    | MPI      | -             |               |
| 148225172 | 9.76  | 1 | 82   | 9.3   | 9.38  | 95.88  | NP_001090937.1  | NP_002480.1    | NDUFA4   | -             | Mitochondrion |
| 194040511 | 5.06  | 1 | 178  | 19.8  | 9.14  | 95.54  | XP_001927896.1  | NP_919299.3    | B3GALTL  | -             |               |
| 194041263 | 2.53  | 1 | 553  | 61.1  | 6.81  | 95.22  | XP_001926497.1  | NP_808881.3    | PDE12    | -             |               |
| 194038056 | 2.24  | 1 | 847  | 92.6  | 7.53  | 94.87  | XP_001925164.1  | NP_001099038.1 | KIF13A   | -             |               |
| 48374067  | 2.39  | 2 | 921  | 102.1 | 6.90  | 94.85  | NP_001001537.1  | NP_002209.2    | ITIH4    | -             | Serum         |
| 194038534 | 7.69  | 1 | 351  | 38.3  | 5.52  | 94.79  | XP_001929109.1  | NP_689657.1    | PTGR2    | -             |               |
| 212549651 | 2.83  | 1 | 566  | 63.2  | 8.32  | 94.77  | NP_001131104.1  | NP_006336.3    | SLC30A9  | Yes (9+0)     |               |
| 113205616 | 9.35  | 2 | 214  | 24.6  | 10.14 | 94.42  | NP_001038008.1  | NP_006004.2    | RPL10    | Yes (9+2)     | Ribosome      |
| 222136592 | 7.32  | 1 | 205  | 23.0  | 6.04  | 94.27  | NP_0011138374.1 | NP_002786.2    | PSMB3    | Yes (9+0)     |               |
| 119352456 | 36.84 | 2 | 57   | 6.4   | 4.78  | 93.77  | ABL63831.1      | NP_001830.1    | CNN3     | Yes (9+0)     |               |
| 33356119  | 20.00 | 1 | 60   | 6.8   | 5.26  | 93.61  | AAQ16316        | NP_009218.2    | MME      | -             |               |
| 194041068 | 2.34  | 1 | 513  | 56.7  | 7.97  | 93.36  | XP_001926717.1  | NP_001019831.2 | KALRN    | -             |               |
| 194036541 | 3.97  | 2 | 705  | 77.9  | 6.00  | 93.25  | XP_001924575.1  | NP_002950.3    | SORT1    | -             |               |
| 194035628 | 8.38  | 3 | 382  | 42.4  | 9.28  | 92.93  | XP_001924315.1  | NP_066301.1    | SNTB1    | Yes (9+0)     |               |
| 13160449  | 45.00 | 2 | 20   | 2.2   | 7.25  | 92.86  | CAC32854.1      | NP_002849.1    | ABCD3    | Yes (9+0)     |               |
| 90903447  | 1.94  | 1 | 620  | 69.8  | 5.12  | 92.46  | ABE02286.1      | NP_001120.3    | AEBP1    | -             |               |
| 155964300 | 19.85 | 2 | 131  | 14.3  | 5.11  | 92.41  | ABU40196.1      | NP_620419.2    | SDR16C5  | -             |               |
| 157427724 | 4.49  | 2 | 334  | 37.6  | 6.73  | 91.59  | NP_001098770.1  | NP_006828.2    | COP55    | -             |               |
| 194043313 | 3.10  | 1 | 355  | 40.7  | 7.61  | 91.01  | XP_001929116.1  | NP_116246.2    | GNAZ     | Yes (9+2/9+0) | Mitochondrion |
| 194042500 | 5.41  | 1 | 185  | 21.4  | 9.69  | 90.85  | XP_001926078.1  | NP_038479.1    | MYOF     | Yes (9+0)     |               |
| 196259976 | 5.76  | 2 | 469  | 49.7  | 6.93  | 90.78  | NP_001124517.1  | NP_001070984.1 | SLC39A7  | Yes (9+0)     |               |
| 194039375 | 5.53  | 2 | 199  | 22.4  | 8.40  | 90.67  | XP_001927232.1  | NP_689945.2    | RSPH9    | -             |               |
| 194044667 | 5.39  | 2 | 427  | 48.2  | 8.69  | 90.48  | XP_001926018.1  | NP_057021.2    | PIGT     | -             |               |
| 194038799 | 12.40 | 1 | 129  | 13.5  | 10.23 | 90.43  | XP_001925166.1  | NP_079428.2    | NUBPL    | -             |               |
| 47522880  | 5.28  | 2 | 568  | 61.3  | 6.99  | 90.36  | NP_999195.1     | NP_001027536.1 | GGT1     | Yes (9+0)     |               |
| 238915589 | 3.14  | 1 | 287  | 33.8  | 5.25  | 90.23  | NP_999136.1     | NP_001822.2    | CLU      | Yes (9+0)     |               |
| 194043317 | 3.86  | 2 | 673  | 76.7  | 8.27  | 90.18  | XP_001925930.1  | NP_004318.3    | BCR      | Yes (9+0)     |               |
| 194035427 | 8.96  | 1 | 134  | 14.9  | 7.30  | 89.92  | XP_001928573.1  | NP_001132982.1 | ECHDC1   | -             |               |
| 118403902 | 4.17  | 1 | 288  | 31.5  | 7.66  | 89.71  | NP_001072132.1  | NP_658985.2    | APOA1BP  | Yes (9+0)     | Serum         |
| 194041571 | 8.02  | 1 | 187  | 21.0  | 6.79  | 89.37  | XP_001924212.1  | NP_036463.1    | MSRA     | -             |               |
| 45269041  | 20.75 | 2 | 106  | 12.0  | 8.62  | 89.24  | AAS55933.1      | NP_000997.1    | RPS3A    | -             | Ribosome      |
| 138752628 | 28.45 | 2 | 116  | 12.6  | 9.80  | 89.16  | CAM32246.1      | NP_001830.1    | CNN3     | Yes (9+0)     |               |
| 71849672  | 2.76  | 2 | 869  | 94.0  | 6.05  | 89.11  | AAZ50617.1      | NP_981961.1    | CD163    | -             |               |
| 194033986 | 1.57  | 2 | 762  | 84.8  | 7.55  | 88.51  | XP_001925873.1  | NP_115547.1    | CEP78    | Yes (9+0)     |               |
| 194035485 | 3.90  | 1 | 538  | 61.2  | 8.81  | 88.24  | XP_001925089.1  | NP_079527.1    | ARHGAP39 | -             |               |
| 194036225 | 7.58  | 1 | 264  | 29.0  | 5.91  | 87.83  | XP_001929676.1  | NP_002787.2    | PSMB4    | Yes (9+0)     |               |
| 194038280 | 2.92  | 1 | 548  | 61.3  | 5.95  | 87.70  | XP_001927091.1  | NP_705933.2    | SLC24A4  | -             |               |
| 30909255  | 3.98  | 2 | 251  | 28.3  | 5.14  | 87.59  | AAP37552.1      | NP_061984.2    | HLA-DRA  | -             |               |
| 194038425 | 1.65  | 1 | 1154 | 127.3 | 6.57  | 87.22  | XP_001926828.1  | NP_056364.1    | PLEKHG3  | -             |               |
| 164664444 | 5.62  | 2 | 356  | 41.7  | 8.13  | 86.70  | NP_001106907.1  | NP_002328.1    | LRPAP1   | -             |               |
| 194043107 | 2.25  | 1 | 757  | 86.7  | 7.15  | 86.16  | XP_001929245.1  | NP_569733.2    | UBE3B    | Yes (9+2/9+0) |               |
| 194041402 | 1.23  | 2 | 1058 | 115.7 | 7.47  | 85.50  | XP_001926329.1  | NP_004551.2    | ROR2     | -             |               |
| 194038512 | 1.16  | 2 | 1804 | 199.7 | 8.24  | 85.40  | XP_001928473.1  | NP_056371.1    | SIPA1L1  | -             |               |
| 194037165 | 2.79  | 2 | 358  | 40.6  | 7.20  | 85.27  | XP_001928704.1  | NP_663786.2    | SEPT3    | Yes (9+2/9+0) |               |
| 297307131 | 12.42 | 3 | 306  | 33.2  | 11.24 | 84.99  | NP_0011171996   | NP_057034.2    | MRPL2    | -             | Mitochondrion |
| 194041354 | 3.04  | 1 | 461  | 53.5  | 6.25  | 84.95  | XP_001926911.1  | NP_443715.1    | IFT122   | Yes (9+2/9+0) |               |
| 10257510  | 4.60  | 1 | 239  | 25.8  | 5.11  | 84.89  | AAF68432.3      | NP_000472.2    | AMT      | -             | Mitochondrion |
| 14269030  | 60.00 | 1 | 40   | 4.7   | 6.51  | 84.60  | AAK57997.1      | NP_000168.1    | GSN      | Yes (9+0)     |               |
| 153792082 | 3.58  | 2 | 755  | 86.4  | 6.21  | 84.36  | NP_001093405.1  | NP_001547.1    | IKBK     | -             |               |
| 194039722 | 2.11  | 2 | 474  | 52.2  | 5.40  | 84.14  | XP_001928023.1  | NP_057440.2    | DCDC2    | -             |               |
| 194037217 | 2.66  | 2 | 752  | 83.8  | 7.14  | 84.13  | NP_001011507.1  | NP_005552.3    | LAMP1    | -             |               |
| 190360625 | 1.56  | 1 | 961  | 108.4 | 6.92  | 84.03  | NP_001121935.1  | NP_001155855.1 | ARHGFE2  | Yes (9+0)     |               |
| 194035033 | 2.33  | 1 | 429  | 49.7  | 5.88  | 83.93  | XP_001928534.1  | NP_003090.2    | SNX1     | Yes (9+0)     |               |
| 68132076  | 16.85 | 1 | 89   | 10.0  | 5.17  | 83.87  | AAV85304.1      | NP_001171034.1 | PPP2R1B  | -             |               |
| 194044687 | 5.05  | 1 | 317  | 35.8  | 8.07  | 83.45  | XP_001928924.1  | NP_005460.2    | ACOT8    | Yes (9+0)     |               |
| 194040538 | 0.96  | 1 | 1148 | 129.1 | 6.25  | 83.36  | XP_001925924.1  | NP_056493.3    | NBEA     | -             |               |
| 178056482 | 7.64  | 2 | 458  | 50.5  | 5.77  | 83.30  | NP_001116607.1  | NP_001013728.2 | PLIN5    | -             |               |
| 194035719 | 4.74  | 1 | 274  | 30.5  | 6.23  | 83.00  | XP_001926413.1  | NP_002052.1    | GCLM     | Yes (9+0)     |               |
| 190360639 | 4.79  | 2 | 167  | 18.6  | 6.18  | 82.72  | NP_001121941.1  | NP_005092.1    | ISG15    | -             |               |
| 194040835 | 6.23  | 1 | 257  | 28.6  | 9.33  | 82.69  | XP_001926074.1  | NP_005098.2    | EXOG     | -             | Mitochondrion |
| 38098644  | 15.97 | 1 | 144  | 15.7  | 6.62  | 82.57  | AAR10973.1      | NP_000628.2    | GSR      | -             | Mitochondrion |
| 194038668 | 3.35  | 2 | 328  | 36.7  | 5.43  | 82.56  | XP_001927445.1  | NP_005688.2    | SCAMP2   | -             |               |
| 194041821 | 2.88  | 1 | 416  | 46.3  | 5.21  | 82.55  | XP_001929145.1  | NP_001002261.1 | ZFYVE27  | -             |               |
| 194042464 | 2.71  | 2 | 553  | 63.8  | 8.35  | 81.94  | XP_001925987.1  | NP_036552.1    | IFIT5    | -             |               |
| 298160923 | 7.86  | 2 | 318  | 36.5  | 5.53  | 81.94  | NP_001177141    | NP_076424.1    | DDRGK1   | -             |               |

|           |       |   |      |       |       |       |                |                |           |                  |               |
|-----------|-------|---|------|-------|-------|-------|----------------|----------------|-----------|------------------|---------------|
| 194036468 | 4.39  | 1 | 342  | 37.0  | 5.74  | 81.62 | XP_001928840.1 | NP_077007.1    | WDR77     | -                |               |
| 194034275 | 8.48  | 2 | 342  | 37.3  | 8.37  | 81.25 | XP_001924827.1 | NP_002442.2    | MTAP      | -                |               |
| 255068732 | 19.64 | 2 | 112  | 12.4  | 8.25  | 81.24 | CAX36905.1     | NP_000574.2    | GC        | -                | Serum         |
| 44889640  | 29.03 | 1 | 62   | 7.4   | 9.41  | 79.90 | AAS48423.1     | NP_001005505.1 | CACNA2D2  | Yes (9+0)        |               |
| 114326183 | 10.00 | 1 | 180  | 20.5  | 5.67  | 79.88 | NP_001041537.1 | NP_001651.1    | ARF4      | Yes (9+2/9+0)    |               |
| 212549653 | 2.08  | 2 | 336  | 38.9  | 7.37  | 79.79 | NP_001131106.1 | NP_443107.1    | VPS26B    | Yes (9+0)        |               |
| 256838117 | 2.00  | 1 | 501  | 55.1  | 8.00  | 79.78 | NP_001157982.1 | NP_001006642.1 | SLC25A25  | -                | Mitochondrion |
| 194041330 | 13.79 | 2 | 261  | 29.9  | 6.81  | 79.54 | XP_001928770.1 | NP_060917.1    | TMEM111   | Yes (9+0)        |               |
| 194040765 | 2.59  | 1 | 348  | 38.3  | 9.36  | 78.93 | XP_001925073.1 | NP_009139.1    | MRPL3     | Yes (Global)     | Mitochondrion |
| 285818434 | 3.01  | 2 | 299  | 34.4  | 8.63  | 78.75 | ADC38890.1     | NP_060714.3    | UQCC      | Yes (9+0)        |               |
| 194034360 | 3.24  | 2 | 649  | 72.3  | 9.45  | 78.40 | XP_001927072.1 | NP_006561.1    | RRAGA     | -                |               |
| 194035338 | 1.39  | 1 | 718  | 78.7  | 5.57  | 77.91 | XP_001926093.1 | NP_001122089.1 | REPS1     | -                |               |
| 194042053 | 2.07  | 1 | 725  | 79.1  | 5.54  | 77.72 | XP_001929043.1 | NP_940916.2    | NHLRC2    | -                |               |
| 154101326 | 6.18  | 2 | 178  | 19.9  | 8.65  | 77.66 | ABS58489.1     | NP_000952.1    | PTGIS     | -                |               |
| 194037700 | 0.40  | 2 | 2481 | 290.3 | 6.06  | 77.49 | XP_001928242.1 | NP_079390.3    | CEP290    | Yes (9+2/9+0)    |               |
| 148233143 | 2.62  | 1 | 534  | 60.9  | 6.01  | 77.45 | NP_001090904.1 | NP_001017962.1 | P4HA1     | Yes (9+0)        |               |
| 47522836  | 5.61  | 1 | 214  | 23.7  | 5.68  | 77.43 | NP_999170.1    | NP_036515.4    | OSTF1     | -                |               |
| 47522740  | 1.92  | 1 | 522  | 57.7  | 6.83  | 77.37 | NP_999120.1    | NP_000503.1    | GALNS     | -                |               |
| 194043214 | 2.94  | 1 | 511  | 57.3  | 7.71  | 77.27 | XP_001929232.1 | NP_114143.1    | TBC1D10A  | -                |               |
| 32170389  | 2.65  | 1 | 378  | 42.8  | 8.66  | 77.20 | CAD99201.1     | NP_056167.1    | POFUT1    | -                |               |
| 113205806 | 1.24  | 1 | 809  | 90.6  | 7.21  | 76.42 | NP_001038055.1 | NP_000292.1    | PLG       | -                | Serum         |
| 194044284 | 5.21  | 1 | 192  | 21.4  | 8.72  | 76.40 | XP_001925938.1 | NP_000998.1    | RPS4X     | Yes (9+0)        | Ribosome      |
| 21703163  | 11.82 | 1 | 110  | 12.0  | 5.06  | 76.35 | AAM76079.1     |                |           | -                | Serum         |
| 194033501 | 4.58  | 1 | 262  | 28.9  | 9.55  | 76.17 | XP_001926029.1 | NP_620132.1    | MRRF      | -                | Mitochondrion |
| 194043246 | 2.45  | 1 | 654  | 74.2  | 6.23  | 75.88 | XP_001924672.1 | NP_110385.1    | OSBP2     | -                |               |
| 194038286 | 4.01  | 1 | 299  | 34.8  | 6.76  | 75.61 | XP_001924290.1 | NP_005104.2    | GOLGA5    | Yes (9+2/9+0)    |               |
| 148237282 | 10.33 | 2 | 213  | 23.3  | 10.77 | 75.48 | NP_001090947.1 | NP_001030168.1 | RPL14     | Yes (9+2)        | Ribosome      |
| 154101338 | 7.89  | 1 | 228  | 26.1  | 9.09  | 75.48 | ABS58495.1     | NP_001052.2    | TBXAS1    | -                |               |
| 194042873 | 1.14  | 1 | 1321 | 146.6 | 7.42  | 74.86 | XP_001928455.1 | NP_065896.1    | PITPNM2   | Yes (9+0)        |               |
| 47523576  | 2.74  | 2 | 292  | 32.2  | 7.97  | 74.69 | NP_999413.1    | NP_861420.1    | HSD11B1   | -                |               |
| 194040461 | 5.03  | 2 | 199  | 21.6  | 9.47  | 74.68 | XP_001928899.1 | NP_689939.1    | EFHA1     | -                |               |
| 264681476 | 6.22  | 1 | 193  | 21.1  | 9.35  | 74.42 | NP_001161101.1 | NP_001986.2    | ACSL1     | -                | Mitochondrion |
| 194033686 | 1.22  | 2 | 819  | 90.8  | 7.25  | 73.65 | XP_001926112.1 | NP_066954.2    | PPP2R4    | Yes (9+0)        |               |
| 194039637 | 0.90  | 1 | 1224 | 137.2 | 7.15  | 73.63 | XP_001927099.1 | NP_001119603.1 | POLG      | -                | Mitochondrion |
| 38230149  | 30.00 | 1 | 40   | 4.2   | 4.72  | 73.57 | AAR14174.1     | NP_005156.1    | ALDOC     | Yes (9+2/9+0)    |               |
| 194033494 | 4.43  | 2 | 677  | 71.2  | 8.65  | 73.46 | XP_001924326.1 | NP_057569.2    | VTA1      | -                |               |
| 194038778 | 2.71  | 2 | 406  | 46.6  | 6.16  | 73.36 | XP_001928303.1 | NP_689419.2    | SNX6      | -                |               |
| 56711358  | 4.67  | 1 | 257  | 27.7  | 9.32  | 73.08 | NP_001008687.1 | NP_898902.1    | PRNP      | Yes (9+0)        |               |
| 47522770  | 3.14  | 1 | 446  | 51.7  | 5.88  | 72.69 | ACR78279.1     | NP_001153647.1 | NAT1      | -                |               |
| 194044772 | 3.02  | 1 | 265  | 28.9  | 5.76  | 72.25 | XP_001927900   | NP_005269.1    | GPM6B     | -                |               |
| 38569721  | 19.67 | 1 | 61   | 7.1   | 6.77  | 71.48 | AAR24381.1     | NP_004499.2    | IDI1      | -                |               |
| 47523702  | 1.02  | 1 | 1277 | 141.9 | 5.43  | 71.39 | NP_999487.1    | NP_000262.2    | NPC1      | Yes (Global)     |               |
| 194033953 | 0.59  | 1 | 1870 | 216.1 | 5.38  | 71.05 | XP_001925689.1 | NP_008949.4    | CEP110    | Yes (Centrosome) |               |
| 3402264   | 5.93  | 1 | 135  | 14.1  | 6.93  | 71.04 | CAA63936.1     | NP_005007.2    | PCBP2     | -                |               |
| 2465404   | 19.35 | 1 | 62   | 7.4   | 8.44  | 70.84 | AAB72090.1     | NP_006254.1    | PSME1     | Yes (9+0)        |               |
| 194034163 | 3.79  | 1 | 475  | 52.9  | 5.47  | 70.57 | XP_001925728   | NP_003374.3    | VLDR      | -                |               |
| 194044689 | 1.86  | 1 | 538  | 58.0  | 8.25  | 70.40 | XP_001926188.1 | NP_219489.1    | SNX21     | -                |               |
| 33317518  | 3.79  | 1 | 290  | 33.4  | 5.57  | 70.12 | AAQ04720       | NP_002818.1    | PTPN1     | -                |               |
| 194041674 | 2.59  | 1 | 424  | 47.7  | 7.96  | 69.71 | XP_001926667.1 | NP_006495.1    | PTPRE     | -                |               |
| 194042740 | 0.99  | 1 | 1010 | 114.2 | 5.90  | 69.55 | XP_001924594.1 | NP_071362.1    | HERC4     | Yes (9+2/9+0)    |               |
| 194042306 | 3.38  | 1 | 621  | 72.0  | 5.53  | 69.49 | XP_001928845.1 | NP_056449.1    | KIAA1279  | -                | Mitochondrion |
| 194034610 | 2.22  | 1 | 450  | 52.9  | 5.50  | 69.32 | XP_001926091.1 | NP_001138439.1 | NEDD4L    | -                |               |
| 88861934  | 17.86 | 1 | 56   | 6.4   | 8.21  | 69.32 | ABD52874.1     | NP_006279.2    | THY1      | Yes (9+0)        |               |
| 194039176 | 1.93  | 1 | 517  | 56.5  | 8.70  | 69.18 | XP_001925238.1 | NP_705841.2    | LPCAT4    | -                |               |
| 285818474 | 1.32  | 1 | 909  | 102.1 | 5.86  | 69.03 | ADC38910.1     | NP_065822.2    | HACE1     | -                |               |
| 118403806 | 6.81  | 1 | 191  | 21.3  | 6.04  | 69.01 | NP_001072148.1 | NP_001034891.1 | CDC42     | Yes (9+2/9+0)    |               |
| 92020123  | 3.83  | 1 | 313  | 34.4  | 5.22  | 68.97 | BAE93252.1     | NP_004360.2    | COL6A3    | -                |               |
| 194038461 | 0.51  | 1 | 2541 | 283.3 | 6.47  | 68.97 | XP_001926176.1 | NP_056161.2    | ZFYVE26   | -                |               |
| 65301133  | 1.94  | 1 | 619  | 70.5  | 5.31  | 68.45 | NP_001018042.1 | NP_000848.1    | GUCY1B3   | Yes (9+0)        |               |
| 157427711 | 1.37  | 1 | 729  | 83.7  | 6.57  | 68.30 | NP_001098762.1 | NP_037386.1    | TBK1      | Yes (9+2/9+0)    |               |
| 194035601 | 7.82  | 1 | 179  | 21.8  | 8.63  | 67.96 | XP_001927839.1 | NP_004996.1    | NDUFB9    | -                | Mitochondrion |
| 98978744  | 17.74 | 1 | 62   | 6.0   | 4.13  | 67.64 | ABF59811.1     | NP_002036.1    | GAP43     | -                |               |
| 178056474 | 5.76  | 1 | 399  | 45.3  | 7.90  | 67.57 | NP_001116606.1 | NP_000226.2    | LIPA      | -                |               |
| 47522706  | 2.75  | 1 | 363  | 39.7  | 5.55  | 67.32 | NP_999053.1    | NP_002380.3    | CD46      | Yes (9+0)        |               |
| 36244585  | 37.50 | 1 | 32   | 3.6   | 5.10  | 67.21 | AAQ85120.1     | NP_002800.2    | PSMD3     | Yes (9+0)        |               |
| 194038386 | 2.53  | 1 | 435  | 46.6  | 10.21 | 67.15 | XP_001926906.1 | NP_037404.2    | SLCO3A1   | -                |               |
| 194038806 | 0.61  | 1 | 1798 | 197.2 | 5.29  | 67.11 | XP_001924707.1 | NP_056197.2    | HECTD1    | -                |               |
| 283443704 | 3.61  | 1 | 527  | 58.4  | 5.49  | 67.07 | ADB19861.1     | NP_036311.3    | FBXO7     | -                |               |
| 117660446 | 16.90 | 1 | 71   | 8.3   | 9.31  | 66.89 | ABK55621.1     | NP_009031.1    | ATP5I     | -                | Mitochondrion |
| 55983056  | 9.26  | 1 | 108  | 11.7  | 4.21  | 66.74 | AAV69970.1     | NP_002801.1    | PSMD4     | -                |               |
| 194044041 | 8.08  | 1 | 198  | 21.9  | 8.18  | 66.60 | XP_001926102.1 | NP_005268.1    | GPM6A     | Yes (9+0)        |               |
| 194044559 | 0.52  | 1 | 1529 | 171.1 | 6.25  | 66.59 | XP_001925182.1 | NP_542194.2    | C20orf117 | -                |               |
| 45269011  | 42.86 | 1 | 28   | 2.9   | 8.02  | 66.45 | AAS55918.1     | NP_004574.2    | RAB5C     | Yes (9+2/9+0)    |               |
| 194036898 | 3.44  | 1 | 291  | 31.9  | 6.67  | 65.80 | XP_001927783.1 | NP_001034800.1 | DEDD      | -                |               |
| 117661101 | 5.06  | 1 | 237  | 27.5  | 11.21 | 65.75 | ABK55654.1     | NP_001001.2    | RPS6      | Yes (9+2/9+0)    | Ribosome      |
| 194041761 | 1.07  | 1 | 1313 | 145.4 | 8.73  | 65.73 | XP_001924696.1 | NP_001030126.1 | SORBS1    | -                |               |
| 194038451 | 0.64  | 2 | 1400 | 153.6 | 8.25  | 65.33 | XP_001925997.1 | NP_065766.1    | PLEKHH1   | -                |               |
| 148223599 | 3.97  | 1 | 277  | 30.0  | 7.30  | 65.28 | NP_001090945.1 | NP_002790.1    | PSMB7     | -                |               |
| 194045114 | 2.19  | 1 | 457  | 53.9  | 5.62  | 65.22 | XP_001924292.1 | NP_056000.1    | ARHGGEF9  | -                |               |
| 165909668 | 2.94  | 1 | 374  | 42.5  | 6.04  | 65.21 | ABY73740.1     | NP_003105.2    | SPAG1     | -                |               |
| 148222424 | 6.16  | 1 | 341  | 37.3  | 8.82  | 65.20 | NP_001090895.1 | NP_003640.2    | DDO       | -                |               |
| 194043095 | 1.35  | 1 | 667  | 74.4  | 6.81  | 65.12 | XP_001926116.1 | NP_476510.1    | GIT2      | -                |               |
| 194035855 | 1.64  | 1 | 610  | 64.5  | 7.33  | 64.71 | XP_001929085.1 | NP_443100.1    | IGSF8     | -                |               |
| 62911467  | 6.82  | 1 | 176  | 20.1  | 5.57  | 64.66 | AAY21386.1     | NP_004098.1    | FCGRT     | -                |               |
| 194043414 | 0.95  | 2 | 839  | 94.5  | 8.92  | 64.52 | XP_001929624.1 | NP_060221.2    | SMPD4     | -                |               |

|           |       |   |      |       |       |       |                |                |          |               |  |               |
|-----------|-------|---|------|-------|-------|-------|----------------|----------------|----------|---------------|--|---------------|
| 21703165  | 11.61 | 1 | 112  | 12.1  | 8.46  | 64.43 | AAM76080.1     |                |          |               |  | Serum         |
| 6013139   | 5.33  | 1 | 319  | 35.3  | 7.83  | 64.14 | AAF01257.1     | NP_001329.1    | CXADR    | -             |  |               |
| 194041688 | 4.81  | 1 | 187  | 21.3  | 5.50  | 63.68 | XP_001924596.1 | NP_005530.3    | INPP5A   | Yes (Global)  |  |               |
| 194044503 | 1.00  | 1 | 899  | 102.7 | 8.54  | 63.56 | XP_001927381.1 | NP_065935.2    | MYH7B    | -             |  |               |
| 194036738 | 8.05  | 1 | 174  | 19.0  | 5.48  | 63.19 | XP_001927278.1 | NP_006321.1    | LYPLA1   | Yes (9+0)     |  |               |
| 15824734  | 11.28 | 1 | 133  | 14.4  | 4.37  | 63.09 | AAL09462.1     | NP_002282.2    | LAMB1    | -             |  |               |
| 194043576 | 0.85  | 1 | 1056 | 113.2 | 8.44  | 62.93 | XP_001928586.1 | NP_003556.1    | ULK1     | -             |  |               |
| 194041294 | 4.46  | 1 | 202  | 23.6  | 7.88  | 62.74 | XP_001925304.1 | NP_886552.2    | TRNT1    | -             |  | Mitochondrion |
| 229892828 | 1.57  | 1 | 637  | 72.6  | 6.29  | 62.25 | NP_001153565.1 | NP_006100.2    | PRMT5    | -             |  |               |
| 194034527 | 2.24  | 1 | 804  | 89.9  | 7.97  | 62.22 | XP_001924324.1 | NP_065976.2    | CACHD1   | -             |  |               |
| 194037728 | 7.36  | 1 | 163  | 18.4  | 6.65  | 61.91 | XP_001926365.1 | NP_001083173.1 | RAP1BL   | -             |  |               |
| 194041369 | 8.28  | 1 | 169  | 18.9  | 5.20  | 61.41 | XP_001924590.1 | NP_003698.1    | RUVBL1   | Yes (9+0)     |  |               |
| 194037351 | 2.01  | 1 | 546  | 59.6  | 7.37  | 61.21 | XP_001925763.1 | NP_056480.1    | AAAS     | -             |  |               |
| 194035587 | 3.19  | 1 | 345  | 39.1  | 6.44  | 60.85 | XP_001924939.1 | NP_055661.3    | KIAA0196 | Yes (9+0)     |  |               |
| 292485836 | 3.04  | 1 | 559  | 61.6  | 9.64  | 60.65 | ADE28533.1     | NP_056350.2    | SPATS2L  | -             |  |               |
| 297307137 | 5.34  | 1 | 206  | 23.7  | 5.14  | 60.54 | NP_0011171999  | NP_002873.1    | RANBP1   | Yes (9+2)     |  |               |
| 194035881 | 4.19  | 1 | 430  | 46.9  | 6.20  | 59.83 | XP_001929212.1 | NP_067012.1    | CADM3    | -             |  |               |
| 194038720 | 2.50  | 1 | 360  | 39.7  | 6.04  | 59.77 | XP_001926345.1 | NP_112574.3    | ADPGK    | -             |  |               |
| 194038048 | 2.57  | 1 | 428  | 47.9  | 5.26  | 59.68 | XP_001924785.1 | NP_006357.1    | CAP2     | -             |  |               |
| 194035113 | 5.78  | 1 | 277  | 30.4  | 5.05  | 59.54 | XP_001925513.1 | NP_059117.3    | COQ3     | -             |  | Mitochondrion |
| 117660743 | 20.00 | 1 | 155  | 16.1  | 9.88  | 59.46 | ABK55635       | NP_005167.2    | ATP5G2   | -             |  | Mitochondrion |
| 194033876 | 4.56  | 1 | 329  | 34.8  | 9.89  | 59.32 | XP_001924641.1 | NP_114401.2    | C9orf5   | -             |  |               |
| 194038256 | 0.50  | 1 | 2004 | 224.8 | 5.88  | 59.24 | XP_001928768.1 | NP_001073883.2 | CCDC88C  | -             |  |               |
| 194039437 | 4.04  | 1 | 322  | 35.4  | 9.31  | 59.17 | XP_001928208.1 | NP_004268.3    | SLC25A27 | -             |  | Mitochondrion |
| 58332864  | 3.75  | 1 | 507  | 55.3  | 8.59  | 58.80 | NP_001011508.1 | NP_542970.1    | SIRPA    | Yes (9+0)     |  |               |
| 194040262 | 6.75  | 1 | 237  | 26.7  | 7.30  | 58.53 | XP_001929671.1 | NP_057361.3    | RAB23    | Yes (9+2/9+0) |  |               |
| 74136759  | 4.38  | 1 | 297  | 32.9  | 6.74  | 58.43 | NP_001028185   | NP_003992.3    | FCGR2B   | -             |  |               |
| 190360597 | 3.24  | 1 | 340  | 38.5  | 9.38  | 58.28 | NP_001121947.1 | NP_057104.2    | TFB1M    | -             |  | Mitochondrion |
| 194042592 | 3.45  | 1 | 290  | 32.9  | 6.37  | 58.28 | XP_001928785.1 | NP_005990.1    | TSNAX    | Yes (9+0)     |  |               |
| 47523922  | 5.17  | 1 | 232  | 26.7  | 9.23  | 58.18 | NP_999602.1    | NP_006361.1    | VTI1B    | -             |  |               |
| 194041392 | 1.27  | 1 | 865  | 96.0  | 8.06  | 57.50 | XP_001928494.1 | NP_006369.3    | SEMA4D   | -             |  |               |
| 73853894  | 1.52  | 1 | 395  | 45.1  | 6.60  | 57.03 | NP_001027529.1 | NP_005473.1    | PIGK     | -             |  |               |
| 166796065 | 3.60  | 1 | 333  | 36.9  | 8.78  | 56.87 | NP_001107758.1 | NP_004084.1    | EFNB2    | -             |  |               |
| 194042826 | 2.30  | 1 | 434  | 48.6  | 6.62  | 56.82 | XP_001928771.1 | NP_036227.1    | AP3M1    | Yes (9+0)     |  |               |
| 47523738  | 3.02  | 1 | 397  | 44.8  | 7.77  | 56.69 | NP_999504.1    | NP_061072.3    | DNAJA4   | Yes (9+2/9+0) |  |               |
| 194044141 | 12.79 | 1 | 172  | 18.8  | 5.26  | 55.76 | XP_001926145.1 | NP_005796.1    | PSMD14   | -             |  |               |
| 5835869   | 5.36  | 1 | 261  | 29.7  | 6.99  | 55.74 | NP_008640.1    | YP_003024032.1 | MT-CO3   | -             |  | Mitochondrion |
| 178057067 | 5.53  | 1 | 380  | 44.5  | 5.07  | 55.41 | NP_001116568.1 | NP_008996.1    | CDC37    | Yes (9+0)     |  |               |
| 194044757 | 1.31  | 1 | 763  | 87.1  | 5.96  | 55.16 | XP_001925292.1 | NP_056506.2    | WWC3     | -             |  |               |
| 194042858 | 1.62  | 1 | 743  | 84.5  | 8.95  | 54.68 | XP_001927747.1 | NP_006806.1    | TMED2    | Yes (9+0)     |  |               |
| 194041378 | 13.13 | 1 | 99   | 11.0  | 9.31  | 54.60 | XP_001924889.1 | NP_002787.2    | PSMB4    | Yes (9+0)     |  |               |
| 45268999  | 7.22  | 1 | 180  | 20.4  | 5.73  | 54.51 | AAS55912.1     | NP_002901.2    | RENBP    | -             |  |               |
| 213021233 | 4.72  | 1 | 212  | 24.7  | 8.19  | 54.43 | NP_001132945.1 | NP_009148.2    | PDCD10   | Yes (9+0)     |  |               |
| 194034417 | 1.61  | 1 | 1059 | 120.6 | 6.24  | 54.22 | XP_001924665.1 | NP_004704.2    | SDCCAG1  | -             |  |               |
| 194037760 | 1.63  | 1 | 674  | 77.3  | 5.25  | 53.37 | XP_001925371.1 | NP_001139685.2 | TBC1D15  | -             |  |               |
| 194033654 | 3.77  | 1 | 265  | 29.9  | 8.31  | 53.25 | XP_001928369.1 | NP_057119.2    | COQ4     | -             |  |               |
| 194034734 | 1.34  | 1 | 1117 | 127.4 | 8.48  | 53.06 | XP_001927765.1 | NP_005145.3    | USP8     | -             |  |               |
| 30523349  | 4.71  | 1 | 255  | 27.8  | 5.85  | 53.05 | AAP31511.1     | NP_997647.1    | FN1      | Yes (9+0)     |  | Serum         |
| 194037506 | 5.26  | 1 | 209  | 22.8  | 6.99  | 53.01 | XP_001927658.1 | NP_001771.1    | CD63     | -             |  |               |
| 194033676 | 1.86  | 1 | 538  | 59.2  | 8.60  | 52.69 | XP_001928954.1 | NP_055723.1    | DOLK     | -             |  |               |
| 194033387 | 4.38  | 1 | 297  | 33.8  | 7.36  | 52.40 | XP_001925977   | NP_005913.2    | MAP3K4   | -             |  |               |
| 194040970 | 1.04  | 1 | 1345 | 147.5 | 6.30  | 52.10 | XP_001924564.1 | NP_073600.3    | FNDC3B   | Yes (9+0)     |  |               |
| 201066354 | 0.99  | 1 | 708  | 79.4  | 5.38  | 51.98 | NP_001128438.1 | NP_036228.1    | APPL1    | Yes (9+0)     |  |               |
| 194041343 | 3.45  | 1 | 319  | 34.4  | 7.08  | 51.96 | XP_001926535.1 | NP_899195.1    | SEC13    | Yes (9+2/9+0) |  |               |
| 47522944  | 1.88  | 1 | 532  | 59.9  | 7.75  | 50.80 | NP_999229.1    | NP_002012.1    | FMO1     | -             |  |               |
| 194042620 | 3.60  | 1 | 278  | 30.1  | 6.65  | 50.52 | XP_001924694.1 | NP_000020.1    | AGT      | -             |  | Serum         |
| 194034958 | 5.71  | 1 | 210  | 24.0  | 9.06  | 50.29 | XP_001925024.1 | NP_060717.1    | TMEM30A  | Yes (9+0)     |  |               |
| 190360643 | 1.13  | 1 | 887  | 97.6  | 5.45  | 50.24 | NP_001121930.1 | NP_001690.2    | AXL      | -             |  |               |
| 264681438 | 5.16  | 1 | 213  | 23.6  | 8.48  | 50.02 | NP_001161114.1 | NP_006310.1    | CDIPT    | Yes (9+0)     |  |               |
| 113196921 | 6.67  | 1 | 135  | 15.3  | 6.00  | 50.02 | ABI31752.1     | NP_000012.1    | PSEN1    | -             |  |               |
| 87137931  | 33.33 | 1 | 57   | 6.8   | 4.53  | 49.74 | ABD28177.1     | NP_005177.2    | CAPN1    | Yes (9+2/9+0) |  |               |
| 194039547 | 9.05  | 1 | 232  | 25.9  | 7.88  | 49.64 | XP_001928898.1 | NP_055969.1    | MESDC2   | Yes (9+0)     |  |               |
| 11544909  | 38.10 | 1 | 21   | 2.5   | 9.01  | 49.28 | CAC17633.1     | NP_001030590.1 | SDHC     | -             |  | Mitochondrion |
| 194044635 | 3.35  | 1 | 388  | 43.6  | 4.98  | 49.04 | XP_001925602.1 | NP_006273.1    | STK4     | -             |  |               |
| 194034612 | 1.35  | 1 | 665  | 73.8  | 5.48  | 48.75 | XP_001926350.1 | NP_001138441.1 | NEDD4L   | -             |  |               |
| 194043041 | 0.92  | 1 | 866  | 99.9  | 6.74  | 48.62 | XP_001924671.1 | NP_079229.2    | NAA25    | -             |  |               |
| 194041951 | 1.06  | 1 | 853  | 94.2  | 6.14  | 48.61 | XP_001929273.1 | NP_060119.3    | CNNM2    | -             |  |               |
| 194044145 | 10.26 | 1 | 156  | 18.1  | 7.28  | 48.44 | XP_001926333.1 | NP_005796.1    | PSMD14   | -             |  |               |
| 113205568 | 6.25  | 1 | 448  | 51.7  | 4.96  | 48.30 | NP_001037995.1 | NP_003757.1    | BECN1    | -             |  |               |
| 47522640  | 1.50  | 1 | 732  | 80.4  | 7.81  | 48.14 | NP_999090.1    | NP_510966.1    | CD97     | Yes (9+0)     |  |               |
| 194036981 | 5.97  | 1 | 201  | 23.1  | 8.78  | 47.49 | XP_001925258.1 | NP_003105.2    | SPAG1    | -             |  |               |
| 194035472 | 5.78  | 1 | 329  | 36.8  | 4.67  | 47.32 | XP_001924798.1 | NP_001010892.1 | RSPH4A   | -             |  |               |
| 194036640 | 2.02  | 1 | 346  | 39.4  | 9.70  | 47.21 | XP_001924653.1 | NP_055109.1    | TRAM1    | Yes (Global)  |  |               |
| 147899515 | 2.42  | 1 | 662  | 75.2  | 4.73  | 46.94 | NP_001090891.1 | NP_001121782.1 | SPARCL1  | -             |  |               |
| 194043881 | 1.89  | 1 | 529  | 54.8  | 10.17 | 46.90 | XP_001926913.1 | NP_004495.2    | AGFG1    | -             |  |               |
| 194042031 | 1.32  | 1 | 683  | 76.6  | 6.43  | 46.76 | XP_001927977.1 | NP_976313.1    | ACSL5    | -             |  | Mitochondrion |
| 209863049 | 2.50  | 1 | 599  | 64.9  | 7.84  | 46.66 | NP_001129438.1 | NP_775897.3    | SLC26A11 | -             |  |               |
| 194045106 | 4.42  | 1 | 249  | 26.7  | 9.16  | 46.30 | XP_001927882.1 | NP_060318.3    | FAM120C  | Yes (9+0)     |  |               |
| 92020110  | 4.07  | 1 | 246  | 27.3  | 4.91  | 46.28 | BAE93251.1     | NP_001840.3    | COL6A2   | -             |  |               |
| 194035630 | 0.77  | 1 | 905  | 100.9 | 7.85  | 45.52 | XP_001924871.1 | NP_071328.2    | MTBP     | -             |  |               |
| 56711370  | 3.03  | 1 | 363  | 40.6  | 8.05  | 45.38 | NP_001008692.1 | NP_055398.1    | LMCD1    | -             |  |               |
| 1769554   | 3.80  | 1 | 237  | 26.5  | 7.17  | 45.09 | AAB39988.1     | NP_000543.2    | VWF      | -             |  | Serum         |
| 194035758 | 1.75  | 1 | 858  | 97.7  | 7.34  | 44.94 | XP_001929199.1 | NP_060573.2    | LRRC8D   | -             |  |               |
| 194035839 | 1.34  | 1 | 596  | 66.6  | 5.43  | 44.57 | XP_001928921.1 | NP_056541.2    | DCAF8    | -             |  |               |
| 194042957 | 0.85  | 1 | 1299 | 138.0 | 9.63  | 44.47 | XP_001929568.1 | NP_002964.3    | ATXN2    | Yes (9+0)     |  |               |

|           |       |   |      |       |      |       |                |                |        |           |
|-----------|-------|---|------|-------|------|-------|----------------|----------------|--------|-----------|
| 194037921 | 6.52  | 1 | 184  | 20.7  | 7.99 | 44.29 | XP_001927316.1 | NP_001491.1    | GMDS   | Yes (9+2) |
| 58003720  | 10.59 | 1 | 85   | 9.8   | 8.62 | 44.03 | AAW62290.1     | NP_000132.3    | FGFR2  | -         |
| 195957254 | 1.34  | 1 | 1191 | 125.3 | 8.59 | 43.93 | ACG59405.1     | NP_005535.1    | IRS1   | -         |
| 164614625 | 4.79  | 1 | 188  | 21.0  | 5.87 | 43.58 | ABY64538.1     | NP_001119574.1 | HP     | - Serum   |
| 194044095 | 1.81  | 1 | 386  | 42.3  | 5.06 | 43.19 | XP_001925879.1 | NP_004865.1    | BAG4   | -         |
| 50054446  | 1.66  | 1 | 722  | 78.8  | 5.96 | 42.75 | NP_001001910.1 | NP_077726.1    | DDX4   | -         |
| 194038316 | 2.56  | 1 | 234  | 27.3  | 6.16 | 42.39 | XP_001925403.1 | NP_075601.1    | OTUB2  | -         |
| 194036959 | 3.13  | 1 | 351  | 40.6  | 4.92 | 40.08 | XP_001925036.1 | NP_056528.2    | RRM2B  | -         |
| 194043613 | 1.64  | 1 | 550  | 60.2  | 6.43 | 39.55 | XP_001924277.1 | NP_076417.2    | AACS   | -         |
| 166796051 | 1.21  | 1 | 744  | 84.6  | 6.93 | 38.64 | NP_001107751.1 | NP_001269.3    | CHUK   | -         |
| 194035482 | 7.59  | 1 | 224  | 24.7  | 7.96 | 35.62 | XP_001926019.1 | NP_054785.2    | COMMD5 | Yes (9+0) |
| 268607631 | 1.14  | 1 | 964  | 105.1 | 7.59 | 34.68 | NP_001161253.1 | NP_004127.1    | IREB2  | -         |
| 194035238 | 0.56  | 1 | 2301 | 259.0 | 6.09 | 29.59 | XP_001924484.1 | NP_055833.2    | DOPEY1 | -         |
